# Supplementary material for: Purple spot damage dynamics investigated by an integrated approach on a 1244 A.D. parchment roll from the Secret Vatican Archive
Source: PubMed Central journal article supplement (PMC5589745; doi:10.1038/s41598-017-05398-7), 2017-09-07
Supplement: 41598_2017_5398_MOESM1_ESM.pdf [file 41598_2017_5398_MOESM1_ESM.pdf]

Purple spot damage dynamics investigated by an integrated approach on a 1244 A.D. parchment roll from the Secret Vatican Archive – Migliore L., Thaller M.C., Vendittozzi G., Mejia A.Y., Mercuri F., Orlanducci S. & Rubechini A.

Table S1. OTUs identification

| OTU n°  | Dominion<br>(% score) | Phylum<br>(% score)     | Class<br>(% score)           | Order<br>(% score)         | Family<br>(% score)             | Genus<br>(% score)                |
|---------|-----------------------|-------------------------|------------------------------|----------------------------|---------------------------------|-----------------------------------|
| OTU0001 | Bacteria<br>(100)     | Actinobacteria<br>(100) | Actinobacteria<br>(100)      | Pseudonocardiales<br>(100) | Pseudonocardiaceae<br>(91)      | unclassified<br>(<50)             |
| OTU0002 | Bacteria<br>(100)     | Actinobacteria<br>(100) | Actinobacteria<br>(100)      | Pseudonocardiales<br>(100) | Pseudonocardiaceae<br>(79)      | unclassified<br>(<50)             |
| OTU0003 | Bacteria<br>(100)     | Proteobacteria<br>(100) | Gammaproteobacteria<br>(100) | Vibrionales<br>(100)       | Vibrionaceae<br>(100)           | <i>Vibrio</i><br>(79)             |
| OTU0004 | Bacteria<br>(100)     | Actinobacteria<br>(100) | Actinobacteria<br>(100)      | Pseudonocardiales<br>(100) | Pseudonocardiaceae<br>(99)      | <i>Saccharopolyspora</i><br>(50)  |
| OTU0005 | Bacteria<br>(100)     | Proteobacteria<br>(100) | Gammaproteobacteria<br>(100) | Alteromonadales<br>(100)   | Pseudoalteromonadaceae<br>(100) | <i>Pseudoalteromonas</i><br>(100) |
| OTU0006 | Bacteria<br>(100)     | Proteobacteria<br>(100) | Gammaproteobacteria<br>(100) | Vibrionales<br>(100)       | Vibrionaceae<br>(100)           | <i>Vibrio</i><br>(63)             |
| OTU0007 | Bacteria<br>(100)     | Proteobacteria<br>(100) | Gammaproteobacteria<br>(100) | Pseudomonadales<br>(100)   | Moraxellaceae<br>(100)          | <i>Acinetobacter</i><br>(100)     |
| OTU0008 | Bacteria<br>(100)     | Proteobacteria<br>(100) | Gammaproteobacteria<br>(100) | Aeromonadales<br>(98)      | Aeromonadaceae<br>(98)          | <i>Aeromonas</i><br>(98)          |
| OTU0009 | Bacteria<br>(100)     | Proteobacteria<br>(100) | Gammaproteobacteria<br>(100) | Vibrionales<br>(100)       | Vibrionaceae<br>(100)           | <i>Vibrio</i><br>(95)             |
| OTU0010 | Bacteria<br>(100)     | Proteobacteria<br>(100) | Gammaproteobacteria<br>(100) | Vibrionales<br>(94)        | Vibrionaceae<br>(94)            | <i>Photobacterium</i><br>(56)     |
| OTU0011 | Bacteria<br>(100)     | Proteobacteria<br>(100) | Gammaproteobacteria<br>(100) | Pseudomonadales<br>(100)   | Moraxellaceae<br>(100)          | <i>Acinetobacter</i><br>(100)     |
| OTU0012 | Bacteria<br>(100)     | Firmicutes<br>(100)     | Bacilli<br>(100)             | Bacillales<br>(100)        | Staphylococcaceae<br>(100)      | <i>Staphylococcus</i><br>(100)    |
| OTU0013 | Bacteria<br>(100)     | Proteobacteria<br>(100) | Gammaproteobacteria<br>(100) | Pseudomonadales<br>(100)   | Pseudomonadaceae<br>(100)       | <i>Pseudomonas</i><br>(100)       |
| OTU0014 | Bacteria<br>(100)     | Firmicutes<br>(100)     | Bacilli<br>(100)             | Lactobacillales<br>(100)   | Streptococcaceae<br>(100)       | <i>Streptococcus</i><br>(100)     |
| OTU0015 | Bacteria<br>(100)     | Actinobacteria<br>(100) | Actinobacteria<br>(100)      | Pseudonocardiales<br>(100) | Pseudonocardiaceae<br>(82)      | unclassified<br>(<50)             |
| OTU0016 | Bacteria<br>(100)     | Proteobacteria<br>(100) | Gammaproteobacteria<br>(100) | Enterobacteriales<br>(100) | Enterobacteriaceae<br>(100)     | unclassified<br>(<50)             |
| OTU0017 | Bacteria<br>(100)     | Proteobacteria<br>(100) | Alphaproteobacteria<br>(100) | Rhizobiales<br>(97)        | Phyllobacteriaceae<br>(94)      | <i>Phyllobacterium</i><br>(94)    |
| OTU0018 | Bacteria<br>(100)     | Firmicutes<br>(100)     | Bacilli<br>(100)             | Lactobacillales<br>(99)    | Enterococcaceae<br>(98)         | <i>Enterococcus</i><br>(98)       |
| OTU0019 | Bacteria<br>(100)     | Actinobacteria<br>(100) | Actinobacteria<br>(100)      | Pseudonocardiales<br>(100) | Pseudonocardiaceae<br>(97)      | <i>Saccharopolyspora</i><br>(74)  |

|         |                   |                         |                              |                            |                             |                                     |
|---------|-------------------|-------------------------|------------------------------|----------------------------|-----------------------------|-------------------------------------|
| OTU0020 | Bacteria<br>(100) | Actinobacteria<br>(100) | Actinobacteria<br>(100)      | Corynebacteriales<br>(100) | Corynebacteriaceae<br>(100) | <i>Corynebacterium</i><br>(100)     |
| OTU0021 | Bacteria<br>(100) | Firmicutes<br>(100)     | Bacilli<br>(100)             | Bacillales<br>(100)        | Staphylococcaceae<br>(100)  | <i>Staphylococcus</i><br>(96)       |
| OTU0022 | Bacteria<br>(100) | Proteobacteria<br>(100) | Gammaproteobacteria<br>(100) | Vibrionales<br>(100)       | Vibrionaceae<br>(100)       | <i>Vibrio</i><br>(83)               |
| OTU0023 | Bacteria<br>(100) | Firmicutes<br>(100)     | Bacilli<br>(100)             | Bacillales<br>(94)         | Bacillaceae1<br>(67)        | <i>Bacillus</i><br>(65)             |
| OTU0024 | Bacteria<br>(100) | Proteobacteria<br>(100) | Gammaproteobacteria<br>(100) | Enterobacteriales<br>(100) | Enterobacteriaceae<br>(100) | <i>Escherichia/Shigella</i><br>(84) |
| OTU0025 | Bacteria<br>(100) | Proteobacteria<br>(100) | Gammaproteobacteria<br>(100) | Vibrionales<br>(100)       | Vibrionaceae<br>(100)       | <i>Vibrio</i><br>(72)               |
| OTU0026 | Bacteria<br>(100) | Actinobacteria<br>(100) | Actinobacteria<br>(100)      | Pseudonocardiales<br>(100) | Pseudonocardiaceae<br>(84)  | unclassified<br>(<50)               |
| OTU0027 | Bacteria<br>(100) | Proteobacteria<br>(100) | Betaproteobacteria<br>(100)  | Neisseriales<br>(96)       | Neisseriaceae<br>(96)       | unclassified<br>(<50)               |
| OTU0028 | Bacteria<br>(100) | Actinobacteria<br>(100) | Actinobacteria<br>(100)      | Pseudonocardiales<br>(100) | Pseudonocardiaceae<br>(98)  | <i>Saccharopolyspora</i><br>(84)    |
| OTU0029 | Bacteria<br>(100) | Actinobacteria<br>(98)  | Actinobacteria<br>(98)       | Corynebacteriales<br>(98)  | Dietziaceae<br>(55)         | <i>Dietzia</i><br>(55)              |
| OTU0030 | Bacteria<br>(100) | Proteobacteria<br>(100) | Gammaproteobacteria<br>(100) | Vibrionales<br>(100)       | Vibrionaceae<br>(100)       | <i>Vibrio</i><br>(95)               |
| OTU0031 | Bacteria<br>(100) | Actinobacteria<br>(100) | Actinobacteria<br>(100)      | Pseudonocardiales<br>(100) | Pseudonocardiaceae<br>(95)  | unclassified<br>(<50)               |
| OTU0032 | Bacteria<br>(100) | Proteobacteria<br>(100) | Gammaproteobacteria<br>(100) | Pseudomonadales<br>(100)   | Moraxellaceae<br>(100)      | <i>Acinetobacter</i><br>(100)       |
| OTU0033 | Bacteria<br>(100) | Actinobacteria<br>(100) | Actinobacteria<br>(100)      | Corynebacteriales<br>(100) | Corynebacteriaceae<br>(100) | <i>Turicella</i><br>(97)            |
| OTU0034 | Bacteria<br>(100) | Proteobacteria<br>(100) | Gammaproteobacteria<br>(100) | Pseudomonadales<br>(100)   | Pseudomonadaceae<br>(100)   | <i>Pseudomonas</i><br>(86)          |
| OTU0035 | Bacteria<br>(100) | Proteobacteria<br>(100) | Gammaproteobacteria<br>(100) | Aeromonadales<br>(100)     | Aeromonadaceae<br>(100)     | <i>Alteromonas</i><br>(95)          |
| OTU0036 | Bacteria<br>(100) | Proteobacteria<br>(100) | Gammaproteobacteria<br>(100) | Pseudomonadales<br>(100)   | Moraxellaceae<br>(100)      | <i>Acinetobacter</i><br>(99)        |
| OTU0037 | Bacteria<br>(100) | Proteobacteria<br>(100) | Gammaproteobacteria<br>(100) | Pseudomonadales<br>(99)    | Pseudomonadaceae<br>(99)    | <i>Pseudomonas</i><br>(94)          |
| OTU0039 | Bacteria<br>(100) | Proteobacteria<br>(100) | Gammaproteobacteria<br>(100) | Vibrionales<br>(100)       | Vibrionaceae<br>(100)       | <i>Photobacterium</i><br>(55)       |
| OTU0040 | Bacteria<br>(100) | Proteobacteria<br>(100) | Betaproteobacteria<br>(100)  | Burkholderiales<br>(100)   | Oxalobacteraceae<br>(100)   | <i>Massilia</i><br>(91)             |
| OTU0041 | Bacteria<br>(100) | Firmicutes<br>(100)     | Bacilli<br>(100)             | Bacillales<br>(96)         | Staphylococcaceae<br>(94)   | <i>Staphylococcus</i><br>(91)       |
| OTU0042 | Bacteria<br>(100) | Firmicutes<br>(100)     | Bacilli<br>(100)             | Lactobacillales<br>(100)   | Streptococcaceae<br>(100)   | <i>Streptococcus</i><br>(100)       |

|         |                   |                         |                              |                            |                                          |                                   |
|---------|-------------------|-------------------------|------------------------------|----------------------------|------------------------------------------|-----------------------------------|
| OTU0043 | Bacteria<br>(100) | Proteobacteria<br>(100) | Gammaproteobacteria<br>(100) | Oceanospirillales<br>(100) | Oceanospirillaceae<br>(100)              | <i>Marinomonas</i><br>(100)       |
| OTU0044 | Bacteria<br>(100) | Firmicutes<br>(100)     | Bacilli<br>(100)             | Lactobacillales<br>(100)   | Streptococcaceae<br>(100)                | <i>Streptococcus</i><br>(100)     |
| OTU0045 | Bacteria<br>(100) | Firmicutes<br>(100)     | Clostridia<br>(100)          | Clostridiales<br>(100)     | Clostridiales_Incertae Sedis<br>XI (100) | <i>Fingoldia</i><br>(100)         |
| OTU0046 | Bacteria<br>(100) | Actinobacteria<br>(100) | Actinobacteria<br>(100)      | Micrococcales<br>(100)     | Micrococcaceae<br>(100)                  | <i>Micrococcus</i><br>(100)       |
| OTU0047 | Bacteria<br>(100) | Actinobacteria<br>(100) | Actinobacteria<br>(100)      | Pseudonocardiales<br>(100) | Pseudonocardiaceae<br>(98)               | <i>Saccharopolyspora</i><br>(52)  |
| OTU0048 | Bacteria<br>(100) | Proteobacteria<br>(100) | Gammaproteobacteria<br>(100) | Pseudomonadales<br>(100)   | Moraxellaceae<br>(100)                   | <i>Enhydrobacter</i><br>(100)     |
| OTU0049 | Bacteria<br>(100) | Actinobacteria<br>(100) | Actinobacteria<br>(100)      | Corynebacteriales<br>(100) | Corynebacteriaceae<br>(100)              | <i>Corynebacterium</i><br>(100)   |
| OTU0050 | Bacteria<br>(100) | Actinobacteria<br>(100) | Actinobacteria<br>(100)      | Corynebacteriales<br>(100) | Corynebacteriaceae<br>(100)              | <i>Corynebacterium</i><br>(100)   |
| OTU0051 | Bacteria<br>(100) | Actinobacteria<br>(100) | Actinobacteria<br>(100)      | Pseudonocardiales<br>(100) | Pseudonocardiaceae<br>(89)               | <i>Saccharopolyspora</i><br>(82)  |
| OTU0052 | Bacteria<br>(100) | Proteobacteria<br>(100) | Gammaproteobacteria<br>(100) | Alteromonadales<br>(100)   | Pseudoalteromonadaceae<br>(100)          | <i>Pseudoalteromonas</i><br>(100) |
| OTU0053 | Bacteria<br>(100) | Proteobacteria<br>(100) | Gammaproteobacteria<br>(100) | Vibrionales<br>(90)        | Vibrionaceae<br>(90)                     | unclassified<br>(<50)             |
| OTU0054 | Bacteria<br>(100) | Actinobacteria<br>(100) | Actinobacteria<br>(100)      | Pseudonocardiales<br>(99)  | Pseudonocardiaceae<br>(94)               | unclassified<br>(<50)             |
| OTU0055 | Bacteria<br>(100) | Proteobacteria<br>(100) | Gammaproteobacteria<br>(100) | Pseudomonadales<br>(100)   | Moraxellaceae<br>(100)                   | <i>Acinetobacter</i><br>(100)     |
| OTU0056 | Bacteria<br>(100) | Proteobacteria<br>(100) | Gammaproteobacteria<br>(100) | Vibrionales<br>(100)       | Vibrionaceae<br>(100)                    | <i>Vibrio</i><br>(94)             |
| OTU0057 | Bacteria<br>(100) | Proteobacteria<br>(100) | Gammaproteobacteria<br>(100) | Pseudomonadales<br>(100)   | Moraxellaceae<br>(100)                   | <i>Acinetobacter</i><br>(100)     |
| OTU0058 | Bacteria<br>(100) | Proteobacteria<br>(100) | Betaproteobacteria<br>(100)  | Burkholderiales<br>(100)   | Oxalobacteraceae<br>(100)                | <i>Massilia</i><br>(89)           |
| OTU0059 | Bacteria<br>(100) | Proteobacteria<br>(100) | Gammaproteobacteria<br>(100) | Pseudomonadales<br>(100)   | Moraxellaceae<br>(100)                   | <i>Acinetobacter</i><br>(100)     |
| OTU0060 | Bacteria<br>(100) | Proteobacteria<br>(100) | Gammaproteobacteria<br>(100) | Pasteurellales<br>(100)    | Pasteurellaceae<br>(100)                 | <i>Haemophilus</i><br>(66)        |
| OTU0061 | Bacteria<br>(100) | Proteobacteria<br>(100) | Gammaproteobacteria<br>(100) | Oceanospirillales<br>(100) | Halomonadaceae<br>(100)                  | <i>Halomonas</i><br>(97)          |
| OTU0062 | Bacteria<br>(100) | Proteobacteria<br>(100) | Gammaproteobacteria<br>(100) | Vibrionales<br>(100)       | Vibrionaceae<br>(100)                    | <i>Allomonas</i><br>(53)          |
| OTU0063 | Bacteria<br>(100) | Firmicutes<br>(100)     | Bacilli<br>(100)             | Lactobacillales<br>(100)   | Carnobacteriaceae<br>(100)               | <i>Dolosigranulum</i><br>(100)    |
| OTU0064 | Bacteria<br>(100) | Proteobacteria<br>(100) | Gammaproteobacteria<br>(100) | Vibrionales<br>(96)        | Vibrionaceae<br>(96)                     | <i>Photobacterium</i><br>(55)     |
| OTU0065 | Bacteria<br>(100) | Firmicutes<br>(100)     | Bacilli<br>(100)             | Lactobacillales<br>(100)   | Streptococcaceae<br>(100)                | <i>Streptococcus</i><br>(99)      |

|         |                   |                         |                              |                            |                                          |                                |
|---------|-------------------|-------------------------|------------------------------|----------------------------|------------------------------------------|--------------------------------|
| OTU0066 | Bacteria<br>(100) | Proteobacteria<br>(100) | Gammaproteobacteria<br>(100) | Pseudomonadales<br>(100)   | Moraxellaceae<br>(100)                   | <i>Acinetobacter</i><br>(100)  |
| OTU0067 | Bacteria<br>(100) | Proteobacteria<br>(100) | Alphaproteobacteria<br>(100) | Rhodobacterales<br>(100)   | Rhodobacteraceae<br>(100)                | <i>Paracoccus</i>              |
| OTU0068 | Bacteria<br>(100) | Proteobacteria<br>(100) | Gammaproteobacteria<br>(100) | Vibrionales<br>(100)       | Vibrionaceae<br>(100)                    | <i>Allomonas</i><br>(50)       |
| OTU0069 | Bacteria<br>(100) | Proteobacteria<br>(100) | Alphaproteobacteria<br>(100) | Rhodobacterales<br>(98)    | Rhodobacteraceae<br>(98)                 | unclassified<br>(<50)          |
| OTU0070 | Bacteria<br>(100) | Firmicutes<br>(100)     | Bacilli<br>(100)             | Bacillales<br>(100)        | Bacillales_Incertae Sedis XII<br>(100)   | <i>Gemella</i><br>(100)        |
| OTU0071 | Bacteria<br>(100) | Proteobacteria<br>(100) | Gammaproteobacteria<br>(100) | Oceanospirillales<br>(100) | Halomonadaceae<br>(98)                   | unclassified<br>(<50)          |
| OTU0072 | Bacteria<br>(100) | Firmicutes<br>(100)     | Bacilli<br>(100)             | Lactobacillales<br>(100)   | unclassified<br>(<50)                    | unclassified<br>(<50)          |
| OTU0073 | Bacteria<br>(100) | Fusobacteria<br>(100)   | Fusobacteriia<br>(100)       | Fusobacteriales<br>(100)   | Fusobacteriaceae<br>(100)                | unclassified<br>(<50)          |
| OTU0074 | Bacteria<br>(100) | Proteobacteria<br>(100) | Gammaproteobacteria<br>(100) | Vibrionales<br>(99)        | Vibrionaceae<br>(99)                     | unclassified<br>(<50)          |
| OTU0075 | Bacteria<br>(100) | Proteobacteria<br>(100) | Gammaproteobacteria<br>(100) | Alteromonadales<br>(99)    | Shewanellaceae<br>(98)                   | <i>Shewanella</i><br>(98)      |
| OTU0076 | Bacteria<br>(100) | Firmicutes<br>(100)     | Negativicutes<br>(100)       | Selenomonadales<br>(100)   | Veillonellaceae<br>(100)                 | <i>Veillonella</i><br>(84)     |
| OTU0077 | Bacteria<br>(100) | Actinobacteria<br>(98)  | Actinobacteria<br>(98)       | Pseudonocardiales<br>(98)  | Pseudonocardiaceae<br>(78)               | unclassified<br>(<50)          |
| OTU0078 | Bacteria<br>(100) | Proteobacteria<br>(100) | Gammaproteobacteria<br>(100) | Vibrionales<br>(100)       | Vibrionaceae<br>(100)                    | <i>Aliivibrio</i><br>(100)     |
| OTU0079 | Bacteria<br>(100) | Actinobacteria<br>(100) | Actinobacteria<br>(100)      | Pseudonocardiales<br>(98)  | Pseudonocardiaceae<br>(77)               | unclassified<br>(<50)          |
| OTU0080 | Bacteria<br>(100) | Actinobacteria<br>(100) | Actinobacteria<br>(100)      | Corynebacteriales<br>(100) | Corynebacteriaceae<br>(84)               | <i>Corynebacterium</i><br>(84) |
| OTU0081 | Bacteria<br>(100) | Firmicutes<br>(100)     | Clostridia<br>(100)          | Clostridiales<br>(100)     | Clostridiales_Incertae Sedis XI<br>(100) | <i>Anaerococcus</i><br>(100)   |
| OTU0082 | Bacteria<br>(100) | Fusobacteria<br>(100)   | Fusobacteriia<br>(100)       | Fusobacteriales<br>(100)   | Fusobacteriaceae<br>(100)                | <i>Fusobacterium</i><br>(98)   |
| OTU0083 | Bacteria<br>(100) | Proteobacteria<br>(100) | Gammaproteobacteria<br>(100) | Vibrionales<br>(100)       | Vibrionaceae<br>(100)                    | <i>Allomonas</i><br>(56)       |
| OTU0084 | Bacteria<br>(100) | Actinobacteria<br>(100) | Actinobacteria<br>(100)      | Corynebacteriales<br>(100) | Corynebacteriaceae<br>(98)               | <i>Corynebacterium</i><br>(98) |
| OTU0085 | Bacteria<br>(100) | Actinobacteria<br>(100) | Actinobacteria<br>(100)      | Actinomycetales<br>(100)   | Actinomycetaceae<br>(100)                | <i>Actinomyces</i><br>(100)    |
| OTU0086 | Bacteria<br>(100) | Proteobacteria<br>(100) | Gammaproteobacteria<br>(100) | Vibrionales<br>(100)       | Vibrionaceae<br>(100)                    | <i>Vibrio</i><br>(91)          |
| OTU0087 | Bacteria<br>(100) | Proteobacteria<br>(100) | Gammaproteobacteria<br>(100) | Pasteurellales<br>(100)    | Pasteurellaceae<br>(100)                 | <i>Haemophilus</i><br>(91)     |
| OTU0088 | Bacteria<br>(100) | Actinobacteria<br>(100) | Actinobacteria<br>(100)      | Micrococcales<br>(100)     | Micrococcaceae<br>(100)                  | <i>Rothia</i><br>(100)         |
| OTU0089 | Bacteria<br>(100) | Proteobacteria<br>(100) | Gammaproteobacteria<br>(100) | Pseudomonadales<br>(98)    | Pseudomonadaceae<br>(98)                 | <i>Pseudomonas</i><br>(87)     |

|         |                   |                         |                              |                            |                             |                                 |
|---------|-------------------|-------------------------|------------------------------|----------------------------|-----------------------------|---------------------------------|
| OUT0090 | Bacteria<br>(100) | Proteobacteria<br>(100) | Gammaproteobacteria<br>(100) | Vibrionales<br>(94)        | Vibrionaceae<br>(94)        | <i>Vibrio</i><br>(67)           |
| OUT0091 | Bacteria<br>(100) | Firmicutes<br>(99)      | Bacilli<br>(99)              | Lactobacillales<br>(99)    | Lactobacillaceae<br>(87)    | unclassified<br>(<50)           |
| OUT0092 | Bacteria<br>(100) | Actinobacteria<br>(100) | Actinobacteria<br>(100)      | Corynebacteriales<br>(100) | Corynebacteriaceae<br>(100) | <i>Corynebacterium</i><br>(100) |
| OUT0093 | Bacteria<br>(100) | Proteobacteria<br>(100) | Gammaproteobacteria<br>(100) | Aeromonadales<br>(100)     | Aeromonadaceae<br>(100)     | <i>Aeromonas</i><br>(100)       |
| OUT0094 | Bacteria<br>(100) | Actinobacteria<br>(100) | Actinobacteria<br>(100)      | Micrococcales<br>(100)     | Micrococcaceae<br>(99)      | <i>Kocuria</i><br>(95)          |
| OUT0095 | Bacteria<br>(100) | Proteobacteria<br>(100) | Gammaproteobacteria<br>(100) | Pasteurellales<br>(100)    | Pasteurellaceae<br>(100)    | <i>Haemophilus</i><br>(76)      |
| OUT0096 | Bacteria<br>(100) | Actinobacteria<br>(100) | Actinobacteria<br>(100)      | Pseudonocardiales<br>(100) | Pseudonocardiaceae<br>(73)  | unclassified<br>(<50)           |
| OUT0097 | Bacteria<br>(100) | Proteobacteria<br>(100) | Gammaproteobacteria<br>(100) | Pseudomonadales<br>(100)   | Pseudomonadaceae<br>(100)   | <i>Pseudomonas</i><br>(79)      |
| OUT0098 | Bacteria<br>(100) | Proteobacteria<br>(100) | Gammaproteobacteria<br>(100) | Vibrionales<br>(100)       | Vibrionaceae<br>(100)       | unclassified<br>(<50)           |
| OUT0099 | Bacteria<br>(100) | Proteobacteria<br>(100) | Gammaproteobacteria<br>(100) | Vibrionales<br>(100)       | Vibrionaceae<br>(100)       | <i>Allomonas</i><br>(70)        |
| OUT0100 | Bacteria<br>(100) | Proteobacteria<br>(100) | Alphaproteobacteria<br>(100) | Rhodospirillales<br>(100)  | Rhodospirillaceae<br>(100)  | <i>Azospirillum</i><br>(99)     |
| OUT0101 | Bacteria<br>(100) | Firmicutes<br>(100)     | Negativicutes<br>(100)       | Selenomonadales<br>(100)   | Veillonellaceae<br>(100)    | <i>Veillonella</i><br>(100)     |
| OUT0102 | Bacteria<br>(100) | Proteobacteria<br>(100) | Gammaproteobacteria<br>(100) | Vibrionales<br>(100)       | Vibrionaceae<br>(100)       | <i>Vibrio</i><br>(61)           |
| OUT0103 | Bacteria<br>(100) | Proteobacteria<br>(100) | Gammaproteobacteria<br>(100) | Chromatiales<br>(100)      | Chromatiaceae<br>(100)      | <i>Rheinheimera</i><br>(100)    |
| OUT0104 | Bacteria<br>(100) | Fusobacteria<br>(100)   | Fusobacteriia<br>(100)       | Fusobacteriales<br>(100)   | Fusobacteriaceae<br>(100)   | <i>Cetobacterium</i><br>(92)    |
| OUT0105 | Bacteria<br>(100) | Actinobacteria<br>(100) | Actinobacteria<br>(100)      | Pseudonocardiales<br>(100) | Pseudonocardiaceae<br>(97)  | unclassified<br>(<50)           |
| OUT0106 | Bacteria<br>(100) | Actinobacteria<br>(100) | Actinobacteria<br>(100)      | Pseudonocardiales<br>(100) | Pseudonocardiaceae<br>(99)  | unclassified<br>(<50)           |
| OUT0107 | Bacteria<br>(100) | Actinobacteria<br>(100) | Actinobacteria<br>(100)      | Corynebacteriales<br>(100) | Corynebacteriaceae<br>(100) | <i>Corynebacterium</i><br>(100) |
| OUT0108 | Bacteria<br>(100) | Actinobacteria<br>(100) | Actinobacteria<br>(100)      | Micrococcales<br>(100)     | Micrococcaceae<br>(100)     | <i>Rothia</i><br>(100)          |
| OUT0109 | Bacteria<br>(100) | Proteobacteria<br>(100) | Gammaproteobacteria<br>(100) | Vibrionales<br>(100)       | Vibrionaceae<br>(100)       | <i>Vibrio</i><br>(59)           |
| OUT0110 | Bacteria<br>(100) | Proteobacteria<br>(100) | Gammaproteobacteria<br>(100) | Aeromonadales<br>(99)      | Aeromonadaceae<br>(99)      | <i>Aeromonas</i><br>(96)        |
| OUT0111 | Bacteria<br>(100) | Proteobacteria<br>(100) | Betaproteobacteria<br>(94)   | Neisseriales<br>(70)       | Neisseriaceae<br>(70)       | unclassified<br>(<50)           |
| OUT0112 | Bacteria<br>(100) | Proteobacteria<br>(100) | Gammaproteobacteria<br>(100) | Pseudomonadales<br>(96)    | Pseudomonadaceae<br>(96)    | <i>Pseudomonas</i><br>(75)      |
| OUT0113 | Bacteria<br>(100) | Actinobacteria<br>(100) | Actinobacteria<br>(100)      | Pseudonocardiales<br>(100) | Pseudonocardiaceae<br>(89)  | unclassified<br>(<50)           |

|         |                   |                               |                              |                            |                                          |                                 |
|---------|-------------------|-------------------------------|------------------------------|----------------------------|------------------------------------------|---------------------------------|
| OTU0114 | Bacteria<br>(100) | Firmicutes<br>(100)           | Clostridia<br>(100)          | Clostridiales<br>(100)     | Clostridiales_Incertae Sedis<br>XI (100) | <i>Peptoniphilus</i><br>(100)   |
| OTU0115 | Bacteria<br>(100) | Bacteroidetes<br>(98)         | Bacteroidia<br>(85)          | Bacteroidales<br>(85)      | Prevotellaceae<br>(77)                   | <i>Alloprevotella</i><br>(66)   |
| OTU0116 | Bacteria<br>(100) | Actinobacteria<br>(100)       | Actinobacteria<br>(100)      | Pseudonocardiales<br>(98)  | Pseudonocardiaceae<br>(82)               | unclassified<br>(<50)           |
| OUT0117 | Bacteria<br>(100) | Firmicutes<br>(99)            | Bacilli<br>(99)              | Bacillales<br>(78)         | Staphylococcaceae<br>(71)                | <i>Staphylococcus</i><br>(71)   |
| OUT0118 | Bacteria<br>(100) | Actinobacteria<br>(100)       | Actinobacteria<br>(100)      | Corynebacteriales<br>(100) | Corynebacteriaceae<br>(91)               | <i>Corynebacterium</i><br>(91)  |
| OUT0119 | Bacteria<br>(100) | Proteobacteria<br>(100)       | Gammaproteobacteria<br>(100) | Vibrionales<br>(100)       | Vibrionaceae<br>(100)                    | <i>Allomonas</i><br>(53)        |
| OUT0120 | Bacteria<br>(100) | Actinobacteria<br>(99)        | Actinobacteria<br>(99)       | Corynebacteriales<br>(99)  | unclassified<br>(<50)                    | unclassified<br>(<50)           |
| OUT0121 | Bacteria<br>(100) | Proteobacteria<br>(100)       | Alphaproteobacteria<br>(100) | Rhodobacterales<br>(87)    | Rhodobacteraceae<br>(87)                 | unclassified<br>(<50)           |
| OUT0122 | Bacteria<br>(100) | Actinobacteria<br>(100)       | Actinobacteria<br>(100)      | Pseudonocardiales<br>(98)  | Pseudonocardiaceae<br>(85)               | unclassified<br>(<50)           |
| OUT0123 | Bacteria<br>(100) | Proteobacteria<br>(100)       | Gammaproteobacteria<br>(100) | Vibrionales<br>(100)       | Vibrionaceae<br>(100)                    | <i>Vibrio</i><br>(76)           |
| OUT0124 | Bacteria<br>(100) | Proteobacteria<br>(100)       | Gammaproteobacteria<br>(100) | Vibrionales<br>(94)        | Vibrionaceae<br>(94)                     | <i>Vibrio</i><br>(67)           |
| OUT0125 | Bacteria<br>(100) | Deinococcus-<br>Thermus (100) | Deinococci<br>(100)          | Deinococcales<br>(100)     | Deinococcaceae<br>(100)                  | <i>Deinococcus</i><br>(100)     |
| OUT0126 | Bacteria<br>(100) | Proteobacteria<br>(100)       | Betaproteobacteria<br>(100)  | Neisseriales<br>(95)       | Neisseriaceae<br>(95)                    | unclassified<br>(<50)           |
| OUT0127 | Bacteria<br>(100) | Actinobacteria<br>(100)       | Actinobacteria<br>(100)      | Pseudonocardiales<br>(100) | Pseudonocardiaceae<br>(89)               | unclassified<br>(<50)           |
| OUT0130 | Bacteria<br>(100) | Proteobacteria<br>(100)       | Gammaproteobacteria<br>(100) | Vibrionales<br>(90)        | Vibrionaceae<br>(90)                     | <i>Salinivibrio</i><br>(56)     |
| OUT0131 | Bacteria<br>(100) | unclassified<br>(<50)         | unclassified<br>(<50)        | unclassified<br>(<50)      | unclassified<br>(<50)                    | unclassified<br>(<50)           |
| OUT0133 | Bacteria<br>(100) | Proteobacteria<br>(100)       | Gammaproteobacteria<br>(100) | Enterobacteriales<br>(100) | Enterobacteriaceae<br>(100)              | unclassified<br>(<50)           |
| OUT0134 | Bacteria<br>(100) | Fusobacteria<br>(100)         | Fusobacteriia<br>(100)       | Fusobacteriales<br>(100)   | Fusobacteriaceae<br>(100)                | <i>Cetobacterium</i><br>(97)    |
| OUT0135 | Bacteria<br>(100) | Fusobacteria<br>(100)         | Fusobacteriia<br>(100)       | Fusobacteriales<br>(100)   | Fusobacteriaceae<br>(100)                | <i>Fusobacterium</i><br>(97)    |
| OUT0136 | Bacteria<br>(100) | Proteobacteria<br>(100)       | Gammaproteobacteria<br>(100) | Xanthomonadales<br>(100)   | Xanthomonadaceae<br>(100)                | <i>Stenotrophomonas</i><br>(97) |
| OUT0137 | Bacteria<br>(100) | Firmicutes<br>(100)           | Bacilli<br>(100)             | Bacillales<br>(100)        | Staphylococcaceae<br>(99)                | <i>Salinicoccus</i><br>(81)     |
| OUT0138 | Bacteria<br>(100) | Proteobacteria<br>(100)       | Alphaproteobacteria<br>(100) | Rhodobacterales<br>(89)    | Rhodobacteraceae<br>(89)                 | unclassified<br>(<50)           |

|         |                   |                         |                              |                            |                                |                                  |
|---------|-------------------|-------------------------|------------------------------|----------------------------|--------------------------------|----------------------------------|
| OUT0139 | Bacteria<br>(100) | Actinobacteria<br>(100) | Actinobacteria<br>(100)      | Pseudonocardiales<br>(100) | unclassified<br>(<50)          | unclassified<br>(<50)            |
| OUT0140 | Bacteria<br>(100) | Proteobacteria<br>(100) | Gammaproteobacteria<br>(100) | Pseudomonadales<br>(79)    | Moraxellaceae<br>(79)          | <i>Acinetobacter</i><br>(76)     |
| OUT0141 | Bacteria<br>(100) | Proteobacteria<br>(100) | Betaproteobacteria<br>(100)  | Burkholderiales<br>(100)   | Comamonadaceae<br>(97)         | <i>Comamonas</i><br>(86)         |
| OUT0142 | Bacteria<br>(100) | Proteobacteria<br>(100) | Gammaproteobacteria<br>(100) | Alteromonadales<br>(100)   | Pseudoalteromonadaceae<br>(93) | <i>Pseudoalteromonas</i><br>(92) |
| OUT0143 | Bacteria<br>(100) | Actinobacteria<br>(99)  | Actinobacteria<br>(99)       | Pseudonocardiales<br>(99)  | Pseudonocardiaceae<br>(86)     | unclassified<br>(<50)            |
| OUT0144 | Bacteria<br>(100) | Proteobacteria<br>(100) | Gammaproteobacteria<br>(100) | Pseudomonadales<br>(82)    | Pseudomonadaceae<br>(82)       | <i>Pseudomonas</i><br>(78)       |
| OUT0145 | Bacteria<br>(100) | Actinobacteria<br>(100) | Actinobacteria<br>(100)      | Pseudonocardiales<br>(100) | Pseudonocardiaceae<br>(87)     | unclassified<br>(<50)            |
| OUT0146 | Bacteria<br>(100) | Actinobacteria<br>(100) | Actinobacteria<br>(100)      | Pseudonocardiales<br>(98)  | Pseudonocardiaceae<br>(86)     | unclassified<br>(<50)            |
| OUT0147 | Bacteria<br>(100) | Proteobacteria<br>(100) | Alphaproteobacteria<br>(100) | Rhizobiales<br>(100)       | Methylobacteriaceae<br>(100)   | <i>Methylobacterium</i><br>(100) |
| OUT0148 | Bacteria<br>(100) | Bacteroidetes<br>(100)  | Bacteroidia<br>(100)         | Bacteroidales<br>(100)     | Porphyromonadaceae<br>(100)    | <i>Tannerella</i><br>(96)        |
| OUT0149 | Bacteria<br>(100) | Actinobacteria<br>(100) | Actinobacteria<br>(100)      | Pseudonocardiales<br>(100) | Pseudonocardiaceae<br>(83)     | unclassified<br>(<50)            |
| OUT0150 | Bacteria<br>(100) | Proteobacteria<br>(100) | Gammaproteobacteria<br>(100) | Xanthomonadales<br>(100)   | Xanthomonadaceae<br>(100)      | <i>Stenotrophomonas</i><br>(90)  |
| OUT0152 | Bacteria<br>(100) | Actinobacteria<br>(100) | Actinobacteria<br>(100)      | Pseudonocardiales<br>(100) | Pseudonocardiaceae<br>(70)     | unclassified<br>(<50)            |
| OUT0153 | Bacteria<br>(100) | Firmicutes<br>(100)     | Bacilli<br>(100)             | Lactobacillales<br>(100)   | Streptococcaceae<br>(100)      | <i>Streptococcus</i><br>(100)    |
| OUT0154 | Bacteria<br>(100) | Actinobacteria<br>(100) | Actinobacteria<br>(100)      | Pseudonocardiales<br>(100) | unclassified<br>(<50)          | unclassified<br>(<50)            |
| OUT0155 | Bacteria<br>(100) | Proteobacteria<br>(100) | Gammaproteobacteria<br>(100) | Pseudomonadales<br>(100)   | Moraxellaceae<br>(100)         | <i>Psychrobacter</i><br>(65)     |
| OUT0156 | Bacteria<br>(100) | Actinobacteria<br>(100) | Actinobacteria<br>(100)      | Pseudonocardiales<br>(99)  | Pseudonocardiaceae<br>(80)     | unclassified<br>(<50)            |
| OUT0157 | Bacteria<br>(100) | Proteobacteria<br>(100) | Alphaproteobacteria<br>(100) | Rhodospirillales<br>(100)  | Rhodospirillaceae<br>(100)     | <i>Azospirillum</i><br>(99)      |
| OUT0158 | Bacteria<br>(100) | Actinobacteria<br>(100) | Actinobacteria<br>(100)      | Pseudonocardiales<br>(100) | Pseudonocardiaceae<br>(97)     | unclassified<br>(<50)            |
| OUT0159 | Bacteria<br>(100) | Proteobacteria<br>(100) | Gammaproteobacteria<br>(100) | Vibrionales<br>(92)        | Vibrionaceae<br>(92)           | <i>Photobacterium</i><br>(55)    |
| OUT0160 | Bacteria<br>(100) | Proteobacteria<br>(100) | Alphaproteobacteria<br>(100) | Rhizobiales<br>(100)       | Methylobacteriaceae<br>(100)   | <i>Methylobacterium</i><br>(100) |
| OUT0161 | Bacteria<br>(100) | Proteobacteria<br>(100) | Gammaproteobacteria<br>(97)  | Aeromonadales<br>(80)      | Aeromonadaceae<br>(80)         | <i>Aeromonas</i><br>(74)         |
| OUT0162 | Bacteria<br>(100) | Actinobacteria<br>(98)  | Actinobacteria<br>(98)       | Pseudonocardiales<br>(98)  | Pseudonocardiaceae<br>(76)     | unclassified<br>(<50)            |
| OUT0163 | Bacteria<br>(100) | Firmicutes<br>(100)     | Bacilli<br>(100)             | Lactobacillales<br>(100)   | Streptococcaceae<br>(99)       | <i>Streptococcus</i><br>(99)     |

|         |                   |                         |                              |                            |                               |                                  |
|---------|-------------------|-------------------------|------------------------------|----------------------------|-------------------------------|----------------------------------|
| OUT0164 | Bacteria<br>(100) | Proteobacteria<br>(100) | Gammaproteobacteria<br>(100) | Vibrionales<br>(100)       | Vibrionaceae<br>(100)         | <i>Allomonas</i><br>(55)         |
| OUT0165 | Bacteria<br>(100) | Actinobacteria<br>(100) | Actinobacteria<br>(100)      | Pseudonocardiales<br>(100) | Pseudonocardiaceae<br>(100)   | <i>Saccharopolyspora</i><br>(67) |
| OUT0167 | Bacteria<br>(100) | Proteobacteria<br>(100) | Gammaproteobacteria<br>(100) | Vibrionales<br>(100)       | Vibrionaceae<br>(100)         | <i>Allomonas</i><br>(76)         |
| OUT0168 | Bacteria<br>(100) | Planctomycets<br>(99)   | Planctomycetia<br>(99)       | Planctomycetales<br>(99)   | Planctomycetaceae<br>(99)     | <i>Blastopirellula</i><br>(51)   |
| OUT0169 | Bacteria<br>(100) | Actinobacteria<br>(100) | Actinobacteria<br>(100)      | Pseudonocardiales<br>(100) | unclassified<br>(<50)         | unclassified<br>(<50)            |
| OUT0170 | Bacteria<br>(100) | Actinobacteria<br>(100) | Actinobacteria<br>(100)      | Pseudonocardiales<br>(100) | Pseudonocardiaceae<br>(87)    | unclassified<br>(<50)            |
| OUT0172 | Bacteria<br>(100) | Proteobacteria<br>(100) | Gammaproteobacteria<br>(100) | Vibrionales<br>(100)       | Vibrionaceae<br>(100)         | <i>Allomonas</i><br>(54)         |
| OUT0173 | Bacteria<br>(100) | Actinobacteria<br>(100) | Actinobacteria<br>(100)      | Pseudonocardiales<br>(100) | Pseudonocardiaceae<br>(80)    | unclassified<br>(<50)            |
| OUT0174 | Bacteria<br>(100) | Actinobacteria<br>(100) | Actinobacteria<br>(100)      | Pseudonocardiales<br>(100) | unclassified<br>(<50)         | unclassified<br>(<50)            |
| OUT0175 | Bacteria<br>(100) | Firmicutes<br>(97)      | Clostridia<br>(96)           | Clostridiales<br>(96)      | Peptostreptococcaceae<br>(51) | unclassified<br>(<50)            |
| OUT0176 | Bacteria<br>(100) | Proteobacteria<br>(100) | Gammaproteobacteria<br>(100) | Pasteurellales<br>(100)    | Pasteurellaceae<br>(100)      | <i>Actinobacillus</i><br>(61)    |
| OUT0178 | Bacteria<br>(100) | Actinobacteria<br>(100) | Actinobacteria<br>(100)      | Pseudonocardiales<br>(100) | Pseudonocardiaceae<br>(85)    | unclassified<br>(<50)            |
| OUT0179 | Bacteria<br>(100) | Proteobacteria<br>(100) | Gammaproteobacteria<br>(100) | Vibrionales<br>(97)        | Vibrionaceae<br>(97)          | <i>Photobacterium</i><br>(51)    |
| OUT0180 | Bacteria<br>(100) | Firmicutes<br>(100)     | Bacilli<br>(100)             | Lactobacillales<br>(100)   | Streptococcaceae<br>(100)     | <i>Streptococcus</i><br>(100)    |
| OUT0181 | Bacteria<br>(100) | Proteobacteria<br>(100) | Gammaproteobacteria<br>(100) | Pseudomonadales<br>(100)   | Moraxellaceae<br>(100)        | <i>Acinetobacter</i><br>(100)    |
| OUT0182 | Bacteria<br>(100) | Actinobacteria<br>(100) | Actinobacteria<br>(100)      | Pseudonocardiales<br>(100) | Pseudonocardiaceae<br>(80)    | unclassified<br>(<50)            |
| OUT0183 | Bacteria<br>(100) | Firmicutes<br>(97)      | Clostridia<br>(92)           | Clostridiales<br>(92)      | unclassified<br>(<50)         | unclassified<br>(<50)            |
| OUT0184 | Bacteria<br>(100) | Proteobacteria<br>(100) | Alphaproteobacteria<br>(100) | Rhizobiales<br>(91)        | unclassified<br>(<50)         | unclassified<br>(<50)            |
| OUT0185 | Bacteria<br>(100) | Proteobacteria<br>(100) | Gammaproteobacteria<br>(100) | Vibrionales<br>(100)       | Vibrionaceae<br>(100)         | <i>Allomonas</i><br>(64)         |
| OUT0186 | Bacteria<br>(100) | Proteobacteria<br>(100) | Alphaproteobacteria<br>(100) | Rhodobacterales<br>(100)   | Rhodobacteraceae<br>(100)     | <i>Silicibacter</i><br>(53)      |
| OUT0187 | Bacteria<br>(100) | Proteobacteria<br>(100) | Gammaproteobacteria<br>(100) | Aeromonadales<br>(87)      | Aeromonadaceae<br>(86)        | <i>Aeromonas</i><br>(72)         |
| OUT0188 | Bacteria<br>(100) | Proteobacteria<br>(100) | Alphaproteobacteria<br>(100) | Rhodobacterales<br>(100)   | Rhodobacteraceae<br>(100)     | unclassified<br>(<50)            |
| OUT0189 | Bacteria<br>(100) | Proteobacteria<br>(100) | Alphaproteobacteria<br>(100) | Rhizobiales<br>(95)        | Phyllobacteriaceae<br>(93)    | <i>Phyllobacterium</i><br>(90)   |



|         |                   |                         |                              |                            |                                          |                              |
|---------|-------------------|-------------------------|------------------------------|----------------------------|------------------------------------------|------------------------------|
| OUT0190 | Bacteria<br>(100) | Proteobacteria<br>(100) | Gammaproteobacteria<br>(100) | Vibrionales<br>(100)       | Vibrionaceae<br>(100)                    | <i>Vibrio</i><br>(72)        |
| OUT0191 | Bacteria<br>(100) | Proteobacteria<br>(100) | Alphaproteobacteria<br>(100) | Rhodobacterales<br>(96)    | Rhodobacteraceae<br>(96)                 | <i>Oceanicola</i><br>(56)    |
| OUT0192 | Bacteria<br>(100) | Proteobacteria<br>(100) | Gammaproteobacteria<br>(100) | Vibrionales<br>(100)       | Vibrionaceae<br>(100)                    | <i>Lucibacterium</i><br>(65) |
| OUT0193 | Bacteria<br>(100) | Proteobacteria<br>(100) | Alphaproteobacteria<br>(100) | Rhodobacterales<br>(96)    | Rhodobacteraceae<br>(96)                 | unclassified<br>(<50)        |
| OUT0194 | Bacteria<br>(100) | Proteobacteria<br>(100) | Gammaproteobacteria<br>(100) | Alteromonadales<br>(95)    | Shewanellaceae<br>(92)                   | <i>Shewanella</i><br>(92)    |
| OUT0195 | Bacteria<br>(100) | Proteobacteria<br>(100) | Gammaproteobacteria<br>(100) | Vibrionales<br>(100)       | Vibrionaceae<br>(100)                    | <i>Vibrio</i><br>(78)        |
| OUT0196 | Bacteria<br>(100) | Firmicutes<br>(100)     | Bacilli<br>(100)             | Bacillales<br>(100)        | Bacillaceae<br>(96) 1                    | <i>Anoxybacillus</i><br>(92) |
| OUT0197 | Bacteria<br>(100) | Bacteroidetes<br>(100)  | Flavobacteria<br>(100)       | Flavobacteriales<br>(100)  | Flavobacteriaceae<br>(100)               | <i>Eudoraea</i><br>(66)      |
| OUT0198 | Bacteria<br>(100) | Bacteroidetes<br>(79)   | Bacteroidia<br>(79)          | Bacteroidales<br>(79)      | Prevotellaceae<br>(78)                   | <i>Prevotella</i><br>(51)    |
| OUT0199 | Bacteria<br>(100) | Actinobacteria<br>(95)  | Actinobacteria<br>(95)       | Pseudonocardiales<br>(95)  | Pseudonocardiaceae<br>(87)               | unclassified<br>(<50)        |
| OUT0200 | Bacteria<br>(100) | Actinobacteria<br>(100) | Actinobacteria<br>(100)      | Pseudonocardiales<br>(100) | unclassified<br>(<50)                    | unclassified<br>(<50)        |
| OUT0201 | Bacteria<br>(100) | Actinobacteria<br>(100) | Actinobacteria<br>(100)      | Pseudonocardiales<br>(100) | Pseudonocardiaceae<br>(86)               | unclassified<br>(<50)        |
| OUT0202 | Bacteria<br>(100) | Actinobacteria<br>(92)  | Actinobacteria<br>(92)       | Corynebacteriales<br>(92)  | unclassified<br>(<50)                    | unclassified<br>(<50)        |
| OUT0203 | Bacteria<br>(100) | Proteobacteria<br>(100) | Gammaproteobacteria<br>(100) | Vibrionales<br>(100)       | Vibrionaceae<br>(100)                    | unclassified<br>(<50)        |
| OUT0204 | Bacteria<br>(100) | Proteobacteria<br>(100) | Gammaproteobacteria<br>(100) | Vibrionales<br>(100)       | Vibrionaceae<br>(100)                    | <i>Allomonas</i><br>(52)     |
| OUT0205 | Bacteria<br>(100) | Proteobacteria<br>(100) | Gammaproteobacteria<br>(100) | Vibrionales<br>(100)       | Vibrionaceae<br>(100)                    | <i>Vibrio</i><br>(76)        |
| OUT0206 | Bacteria<br>(100) | Bacteroidetes<br>(99)   | Bacteroidia<br>(97)          | Bacteroidales<br>(97)      | Porphyromonadaceae<br>(94)               | <i>Porphyromonas</i><br>(63) |
| OUT0207 | Bacteria<br>(100) | Actinobacteria<br>(100) | Actinobacteria<br>(100)      | Pseudonocardiales<br>(99)  | Pseudonocardiaceae<br>(89)               | unclassified<br>(<50)        |
| OUT0208 | Bacteria<br>(100) | Proteobacteria<br>(100) | Alphaproteobacteria<br>(100) | Rhodobacterales<br>(99)    | Rhodobacteraceae<br>(99)                 | <i>Phaeobacter</i><br>(67)   |
| OUT0209 | Bacteria<br>(100) | Proteobacteria<br>(100) | Gammaproteobacteria<br>(100) | Vibrionales<br>(100)       | Vibrionaceae<br>(100)                    | <i>Vibrio</i><br>(63)        |
| OUT0211 | Bacteria<br>(100) | Bacteroidetes<br>(100)  | Flavobacteria<br>(77)        | Flavobacteriales<br>(77)   | Cryomorphaceae<br>(60)                   | unclassified<br>(<50)        |
| OUT0212 | Bacteria<br>(100) | Firmicutes<br>(100)     | Clostridia<br>(100)          | Clostridiales<br>(100)     | Clostridiales_Incertae Sedis<br>XI (100) | <i>Murdochiella</i><br>(100) |
| OUT0213 | Bacteria<br>(100) | Proteobacteria<br>(100) | Gammaproteobacteria<br>(100) | Vibrionales<br>(100)       | Vibrionaceae<br>(100)                    | <i>Vibrio</i><br>(74)        |
| OUT0214 | Bacteria<br>(100) | Proteobacteria<br>(100) | Gammaproteobacteria<br>(100) | Vibrionales<br>(100)       | Vibrionaceae<br>(100)                    | <i>vibrio</i><br>(55)        |

|         |                   |                                   |                              |                            |                                          |                                |
|---------|-------------------|-----------------------------------|------------------------------|----------------------------|------------------------------------------|--------------------------------|
| OUT0215 | Bacteria<br>(100) | Proteobacteria<br>(100)           | Alphaproteobacteria<br>(100) | Rhizobiales<br>(90)        | Phyllobacteriaceae<br>(89)               | <i>Phyllobacterium</i><br>(89) |
| OTU0216 | Bacteria<br>(100) | Proteobacteria<br>(100)           | Alphaproteobacteria<br>(100) | Rhizobiales<br>(80)        | Phyllobacteriaceae<br>(80)               | <i>Phyllobacterium</i><br>(78) |
| OTU0217 | Bacteria<br>(100) | Actinobacteria<br>(100)           | Actinobacteria<br>(100)      | Micrococcales<br>(100)     | Brevibacteriaceae<br>(100)               | <i>Brevibacterium</i><br>(100) |
| OTU0218 | Bacteria<br>(100) | Proteobacteria<br>(100)           | Alphaproteobacteria<br>(100) | Sphingomonadales<br>(99)   | Sphingomonadaceae<br>(98)                | <i>Sphingomonas</i><br>(98)    |
| OTU0219 | Bacteria<br>(100) | Firmicutes<br>(100)               | Clostridia<br>(100)          | Clostridiales<br>(100)     | Clostridiales_Incertae Sedis<br>XI (100) | <i>Anaerococcus</i><br>(100)   |
| OTU0220 | Bacteria<br>(100) | Proteobacteria<br>(100)           | Alphaproteobacteria<br>(100) | Rhizobiales<br>(83)        | Phyllobacteriaceae<br>(80)               | <i>Phyllobacterium</i><br>(79) |
| OTU0221 | Bacteria<br>(100) | Cyanobacteria/<br>Chloroplast(61) | unclassified<br>(<50)        | unclassified<br>(<50)      | unclassified<br>(<50)                    | unclassified<br>(<50)          |
| OTU0222 | Bacteria<br>(100) | Actinobacteria<br>(98)            | Actinobacteria<br>(98)       | Pseudonocardiales<br>(98)  | Pseudonocardiaceae<br>(75)               | unclassified<br>(<50)          |
| OTU0223 | Bacteria<br>(100) | Proteobacteria<br>(100)           | Gammaproteobacteria<br>(100) | Alteromonadales<br>(70)    | unclassified<br>(<50)                    | unclassified<br>(<50)          |
| OTU0224 | Bacteria<br>(100) | Actinobacteria<br>(100)           | Actinobacteria<br>(100)      | Pseudonocardiales<br>(100) | Pseudonocardiaceae<br>(87)               | unclassified<br>(<50)          |
| OTU0225 | Bacteria<br>(100) | Proteobacteria<br>(100)           | Gammaproteobacteria<br>(100) | Vibrionales<br>(100)       | Vibrionaceae<br>(100)                    | unclassified<br>(<50)          |
| OTU0226 | Bacteria<br>(100) | Proteobacteria<br>(100)           | Gammaproteobacteria<br>(100) | Vibrionales<br>(100)       | Vibrionaceae<br>(100)                    | <i>Vibrio</i><br>(75)          |
| OTU0227 | Bacteria<br>(100) | Proteobacteria<br>(100)           | Betaproteobacteria<br>(100)  | Burkholderiales<br>(100)   | Burkholderiales_incertae<br>Sedis (97)   | <i>Sphaerotilus</i><br>(97)    |
| OUT0228 | Bacteria<br>(100) | Actinobacteria<br>(100)           | Actinobacteria<br>(100)      | Pseudonocardiales<br>(100) | Pseudonocardiaceae<br>(90)               | unclassified<br>(<50)          |
| OUT0229 | Bacteria<br>(100) | Actinobacteria<br>(100)           | Actinobacteria<br>(100)      | Pseudonocardiales<br>(99)  | Pseudonocardiaceae<br>(70)               | unclassified<br>(<50)          |
| OUT0230 | Bacteria<br>(100) | Proteobacteria<br>(100)           | Gammaproteobacteria<br>(99)  | Pseudomonadales<br>(99)    | Pseudomonadaceae<br>(99)                 | <i>Pseudomonas</i><br>(50)     |
| OUT0231 | Bacteria<br>(100) | Firmicutes<br>(100)               | Bacilli<br>(100)             | Lactobacillales<br>(99)    | Carnobacteriaceae<br>(97)                | <i>Granulicatella</i><br>(92)  |
| OUT0232 | Bacteria<br>(100) | Actinobacteria<br>(100)           | Actinobacteria<br>(100)      | Pseudonocardiales<br>(100) | Pseudonocardiaceae<br>(88)               | unclassified<br>(<50)          |
| OUT0235 | Bacteria<br>(100) | Actinobacteria<br>(100)           | Actinobacteria<br>(100)      | Pseudonocardiales<br>(100) | Pseudonocardiaceae<br>(76)               | unclassified<br>(<50)          |
| OUT0236 | Bacteria<br>(100) | Proteobacteria<br>(100)           | Alphaproteobacteria<br>(100) | Rhodobacterales<br>(100)   | Rhodobacteraceae<br>(100)                | <i>Donghicola</i><br>(59)      |
| OUT0237 | Bacteria<br>(100) | Planctomycets<br>(97)             | Planctomycetia<br>(97)       | Planctomycetales<br>(97)   | Planctomycetaceae<br>(97)                | <i>Planctomyces</i><br>(78)    |
| OUT0238 | Bacteria<br>(100) | Bacteroidetes<br>(100)            | Flavobacteria<br>(100)       | Flavobacteriales<br>(100)  | Flavobacteriaceae<br>(100)               | <i>Capnocytophaga</i><br>(100) |
| OUT0239 | Bacteria<br>(100) | Proteobacteria<br>(100)           | Gammaproteobacteria<br>(100) | Vibrionales<br>(100)       | Vibrionaceae<br>(100)                    | <i>Vibrio</i><br>(68)          |
| OUT0240 | Bacteria<br>(100) | Actinobacteria<br>(100)           | Actinobacteria<br>(100)      | Actinomycetales<br>(100)   | Actinomycetaceae<br>(100)                | <i>Actinomyces</i><br>(100)    |

|         |                   |                         |                              |                            |                             |                               |
|---------|-------------------|-------------------------|------------------------------|----------------------------|-----------------------------|-------------------------------|
| OTU0242 | Bacteria<br>(100) | Actinobacteria<br>(100) | Actinobacteria<br>(100)      | Pseudonocardiales<br>(100) | Pseudonocardiaceae<br>(97)  | unclassified<br>(<50)         |
| OTU0243 | Bacteria<br>(100) | Firmicutes<br>(100)     | Negativicutes<br>(100)       | Selenomonadales<br>(100)   | Veillonellaceae<br>(100)    | <i>Veillonella</i><br>(100)   |
| OTU0246 | Bacteria<br>(100) | Proteobacteria<br>(100) | Gammaproteobacteria<br>(100) | Alteromonadales<br>(99)    | Shewanellaceae<br>(99)      | <i>Shewanella</i><br>(99)     |
| OTU0251 | Bacteria<br>(100) | Proteobacteria<br>(100) | Gammaproteobacteria<br>(100) | Oceanospirillales<br>(100) | Oceanospirillaceae<br>(100) | <i>Marinomonas</i><br>(99)    |
| OTU0252 | Bacteria<br>(100) | Actinobacteria<br>(100) | Actinobacteria<br>(100)      | Micrococcales<br>(100)     | Microbacteriaceae<br>(100)  | <i>Zimmermannella</i><br>(81) |
| OTU0253 | Bacteria<br>(100) | Proteobacteria<br>(100) | Gammaproteobacteria<br>(100) | Oceanospirillales<br>(100) | Oceanospirillaceae<br>(100) | <i>Marinomonas</i><br>(100)   |
| OTU0254 | Bacteria<br>(100) | Actinobacteria<br>(99)  | Actinobacteria<br>(99)       | Pseudonocardiales<br>(99)  | Pseudonocardiaceae<br>(83)  | unclassified<br>(<50)         |
| OTU0255 | Bacteria<br>(100) | Proteobacteria<br>(100) | Gammaproteobacteria<br>(100) | Aeromonadales<br>(90)      | Aeromonadaceae<br>(90)      | <i>Aeromonas</i><br>(90)      |
| OTU0256 | Bacteria<br>(100) | Actinobacteria<br>(100) | Actinobacteria<br>(100)      | Pseudonocardiales<br>(99)  | Pseudonocardiaceae<br>(93)  | unclassified<br>(<50)         |
| OTU0257 | Bacteria<br>(100) | Proteobacteria<br>(100) | Gammaproteobacteria<br>(100) | Xanthomonadales<br>(100)   | Xanthomonadaceae<br>(100)   | <i>Xanthomonas</i><br>(99)    |
| OTU0258 | Bacteria<br>(100) | Proteobacteria<br>(100) | Gammaproteobacteria<br>(100) | Vibrionales<br>(100)       | Vibrionaceae<br>(100)       | <i>Allomonas</i><br>(60)      |
| OTU0259 | Bacteria<br>(100) | Proteobacteria<br>(100) | Gammaproteobacteria<br>(100) | Vibrionales<br>(100)       | Vibrionaceae<br>(100)       | <i>Listonella</i><br>(65)     |
| OTU0261 | Bacteria<br>(100) | Proteobacteria<br>(100) | Gammaproteobacteria<br>(100) | Vibrionales<br>(94)        | Vibrionaceae<br>(94)        | <i>Salinivibrio</i><br>(52)   |
| OTU0263 | Bacteria<br>(100) | Proteobacteria<br>(100) | Gammaproteobacteria<br>(100) | Chromatiales<br>(98)       | Chromatiaceae<br>(98)       | <i>Rheinheimera</i><br>(98)   |
| OTU0264 | Bacteria<br>(100) | Proteobacteria<br>(100) | Betaproteobacteria<br>(100)  | Burkholderiales<br>(100)   | Comamonadaceae<br>(95)      | <i>Delftia</i><br>(76)        |
| OTU0265 | Bacteria<br>(100) | Proteobacteria<br>(100) | Gammaproteobacteria<br>(99)  | Pseudomonadales<br>(99)    | Moraxellaceae<br>(99)       | <i>Acinetobacter</i><br>(99)  |
| OTU0268 | Bacteria<br>(100) | Proteobacteria<br>(100) | Alphaproteobacteria<br>(100) | Rhodobacterales<br>(100)   | Rhodobacteraceae<br>(100)   | unclassified<br>(<50)         |
| OTU0269 | Bacteria<br>(100) | Proteobacteria<br>(100) | Gammaproteobacteria<br>(100) | Chromatiales<br>(96)       | Chromatiaceae<br>(96)       | <i>Rheinheimera</i><br>(96)   |
| OTU0270 | Bacteria<br>(100) | Actinobacteria<br>(100) | Actinobacteria<br>(100)      | Micrococcales<br>(100)     | Micrococcaceae<br>(100)     | <i>Nesterenkonia</i><br>(81)  |
| OTU0271 | Bacteria<br>(100) | Actinobacteria<br>(100) | Actinobacteria<br>(100)      | Pseudonocardiales<br>(99)  | Pseudonocardiaceae<br>(90)  | unclassified<br>(<50)         |
| OTU0272 | Bacteria<br>(100) | Bacteroidetes<br>(99)   | Bacteroidia<br>(98)          | Bacteroidales<br>(98)      | Porphyromonadaceae<br>(97)  | <i>Porphyromonas</i><br>(79)  |
| OTU0273 | Bacteria<br>(100) | Actinobacteria<br>(100) | Actinobacteria<br>(100)      | Pseudonocardiales<br>(100) | Pseudonocardiaceae<br>(82)  | unclassified<br>(<50)         |
| OTU0274 | Bacteria<br>(100) | Proteobacteria<br>(100) | Gammaproteobacteria<br>(100) | Vibrionales<br>(99)        | Vibrionaceae<br>(99)        | <i>Allomonas</i><br>(94)      |
| OTU0275 | Bacteria<br>(100) | Actinobacteria<br>(100) | Actinobacteria<br>(100)      | Pseudonocardiales<br>(100) | Pseudonocardiaceae<br>(90)  | unclassified<br>(<50)         |

|         |                   |                         |                              |                            |                                |                                  |
|---------|-------------------|-------------------------|------------------------------|----------------------------|--------------------------------|----------------------------------|
| OTU0276 | Bacteria<br>(100) | Actinobacteria<br>(100) | Actinobacteria<br>(100)      | Micrococcales<br>(100)     | Micrococcaceae<br>(97)         | <i>Nesterenkonia</i><br>(54)     |
| OUT0277 | Bacteria<br>(100) | Actinobacteria<br>(100) | Actinobacteria<br>(100)      | Pseudonocardiales<br>(100) | Pseudonocardiaceae<br>(87)     | unclassified<br>(<50)            |
| OUT0280 | Bacteria<br>(100) | Actinobacteria<br>(100) | Actinobacteria<br>(100)      | Pseudonocardiales<br>(100) | Pseudonocardiaceae<br>(87)     | unclassified<br>(<50)            |
| OUT0281 | Bacteria<br>(100) | Actinobacteria<br>(100) | Actinobacteria<br>(100)      | Corynebacteriales<br>(100) | Corynebacteriaceae<br>(94)     | <i>Nesterenkonia</i><br>(87)     |
| OUT0283 | Bacteria<br>(100) | Proteobacteria<br>(100) | Gammaproteobacteria<br>(100) | Vibrionales<br>(100)       | Vibrionaceae<br>(100)          | <i>Allomonas</i><br>(51)         |
| OUT0284 | Bacteria<br>(100) | Proteobacteria<br>(100) | Betaproteobacteria<br>(100)  | Rhodocyclales<br>(94)      | Rhodocyclaceae<br>(94)         | unclassified<br>(<50)            |
| OUT0285 | Bacteria<br>(100) | Proteobacteria<br>(100) | Alphaproteobacteria<br>(100) | Rhizobiales<br>(85)        | Phyllobacteriaceae<br>(82)     | <i>Phyllobacterium</i><br>(82)   |
| OUT0288 | Bacteria<br>(100) | Actinobacteria<br>(100) | Actinobacteria<br>(100)      | Pseudonocardiales<br>(100) | Pseudonocardiaceae<br>(95)     | unclassified<br>(<50)            |
| OUT0289 | Bacteria<br>(100) | Proteobacteria<br>(100) | Gammaproteobacteria<br>(100) | Oceanospirillales<br>(98)  | Oceanospirillaceae<br>(98)     | <i>Marinomonas</i><br>(98)       |
| OUT0290 | Bacteria<br>(100) | Proteobacteria<br>(100) | Gammaproteobacteria<br>(100) | Vibrionales<br>(100)       | Vibrionaceae<br>(100)          | <i>Allomonas</i><br>(78)         |
| OUT0291 | Bacteria<br>(100) | Actinobacteria<br>(100) | Actinobacteria<br>(100)      | Pseudonocardiales<br>(100) | Pseudonocardiaceae<br>(86)     | unclassified<br>(<50)            |
| OUT0293 | Bacteria<br>(100) | Bacteroidetes<br>(100)  | Bacteroidia<br>(99)          | Bacteroidales<br>(99)      | Porphyromonadaceae<br>(95)     | <i>Porphyromonas</i><br>(70)     |
| OUT0294 | Bacteria<br>(100) | Actinobacteria<br>(99)  | Actinobacteria<br>(99)       | Pseudonocardiales<br>(99)  | Pseudonocardiaceae<br>(78)     | unclassified<br>(<50)            |
| OUT0295 | Bacteria<br>(100) | Proteobacteria<br>(100) | Gammaproteobacteria<br>(100) | Pseudomonadales<br>(100)   | Moraxellaceae<br>(100)         | <i>Acinetobacter</i><br>(100)    |
| OUT0296 | Bacteria<br>(99)  | Bacteroidetes<br>(82)   | Bacteroidia<br>(77)          | Bacteroidales<br>(77)      | Prevotellaceae<br>(64)         | <i>Prevotella</i><br>(56)        |
| OUT0297 | Bacteria<br>(100) | Planctomycets<br>(88)   | Planctomycetia<br>(88)       | Planctomycetales<br>(88)   | Planctomycetaceae<br>(88)      | <i>Pirellula</i><br>(56)         |
| OUT0298 | Bacteria<br>(100) | Bacteroidetes<br>(100)  | Flavobacteria<br>(98)        | Flavobacteriales<br>(98)   | Cryomorphaceae<br>(98)         | unclassified<br>(<50)            |
| OUT0299 | Bacteria<br>(100) | Actinobacteria<br>(100) | Actinobacteria<br>(100)      | Corynebacteriales<br>(100) | Corynebacteriaceae<br>(94)     | <i>Corynebacterium</i><br>(91)   |
| OUT0300 | Bacteria<br>(100) | Actinobacteria<br>(100) | Actinobacteria<br>(100)      | Pseudonocardiales<br>(100) | Pseudonocardiaceae<br>(59)     | unclassified<br>(<50)            |
| OUT0301 | Bacteria<br>(100) | Proteobacteria<br>(100) | Alphaproteobacteria<br>(100) | Caulobacterales<br>(100)   | Caulobacteraceae<br>(100)      | <i>Brevundimonas</i><br>(100)    |
| OUT0302 | Bacteria<br>(100) | Proteobacteria<br>(100) | Gammaproteobacteria<br>(100) | Vibrionales<br>(95)        | Vibrionaceae<br>(95)           | <i>Listonella</i><br>(55)        |
| OUT0303 | Bacteria<br>(100) | Proteobacteria<br>(100) | Alphaproteobacteria<br>(100) | Rhodobacterales<br>(88)    | Rhodobacteraceae<br>(99)       | <i>Oceanicola</i><br>(84)        |
| OUT0304 | Bacteria<br>(100) | Proteobacteria<br>(100) | Gammaproteobacteria<br>(73)  | Alteromonadales<br>(70)    | Pseudoalteromonadaceae<br>(59) | <i>Pseudoalteromonas</i><br>(56) |
| OUT0305 | Bacteria<br>(100) | Firmicutes<br>(100)     | Negativicutes<br>(98)        | Selenomonadales<br>(98)    | Veillonellaceae<br>(98)        | <i>Veillonella</i><br>(87)       |

|         |                   |                         |                              |                            |                                        |                                    |
|---------|-------------------|-------------------------|------------------------------|----------------------------|----------------------------------------|------------------------------------|
| OUT0306 | Bacteria<br>(100) | Proteobacteria<br>(100) | Gammaproteobacteria<br>(100) | Pseudomonadales<br>(99)    | Moraxellaceae<br>(99)                  | <i>Acinetobacter</i><br>(98)       |
| OTU0307 | Bacteria<br>(100) | Firmicutes<br>(99)      | Clostridia<br>(99)           | Clostridiales<br>(98)      | Ruminococcaceae<br>(89)                | <i>Clostridium IV</i><br>(69)      |
| OTU0308 | Bacteria<br>(100) | Proteobacteria<br>(100) | Gammaproteobacteria<br>(100) | Pseudomonadales<br>(100)   | Moraxellaceae<br>(100)                 | <i>Acinetobacter</i><br>(98)       |
| OTU0309 | Bacteria<br>(100) | Proteobacteria<br>(100) | Gammaproteobacteria<br>(100) | Vibrionales<br>(100)       | Vibrionaceae<br>(100)                  | <i>Lucibacterium</i><br>(60)       |
| OTU0310 | Bacteria<br>(100) | Proteobacteria<br>(100) | Gammaproteobacteria<br>(100) | Vibrionales<br>(93)        | Vibrionaceae<br>(93)                   | <i>Photobacterium</i><br>(62)      |
| OTU0311 | Bacteria<br>(100) | Proteobacteria<br>(100) | Alphaproteobacteria<br>(99)  | Rhizobiales<br>(99)        | Hyphomicrobiaceae<br>(65)              | <i>Rhodoplanes</i><br>(58)         |
| OTU0312 | Bacteria<br>(100) | Actinobacteria<br>(100) | Actinobacteria<br>(100)      | Pseudonocardiales<br>(99)  | unclassified<br>(<50)                  | unclassified<br>(<50)              |
| OTU0313 | Bacteria<br>(100) | Firmicutes<br>(100)     | Bacilli<br>(100)             | Lactobacillales<br>(100)   | Carnobacteriaceae<br>(100)             | <i>Dolosigranulum</i><br>(100)     |
| OTU0314 | Bacteria<br>(100) | Proteobacteria<br>(100) | Gammaproteobacteria<br>(100) | Vibrionales<br>(100)       | Vibrionaceae<br>(100)                  | <i>Allomonas</i><br>(81)           |
| OTU0315 | Bacteria<br>(100) | Actinobacteria<br>(100) | Actinobacteria<br>(100)      | Micrococcales<br>(100)     | unclassified<br>(<50)                  | unclassified<br>(<50)              |
| OTU0316 | Bacteria<br>(100) | Firmicutes<br>(100)     | Bacilli<br>(100)             | Bacillales<br>(100)        | Bacillales_Incertae Sedis XII<br>(100) | <i>Gemella</i><br>(100)            |
| OTU0317 | Bacteria<br>(100) | Proteobacteria<br>(100) | Gammaproteobacteria<br>(100) | Vibrionales<br>(98)        | Vibrionaceae<br>(98)                   | <i>Allomonas</i><br>(81)           |
| OTU0318 | Bacteria<br>(100) | Firmicutes<br>(100)     | Bacilli<br>(100)             | Lactobacillales<br>(100)   | Aerococcaceae<br>(100)                 | <i>Aerococcus</i><br>(100)         |
| OTU0321 | Bacteria<br>(100) | Firmicutes<br>(100)     | Bacilli<br>(100)             | Lactobacillales<br>(100)   | Lactobacillaceae<br>(95)               | <i>Lactobacillus</i><br>(94)       |
| OTU0322 | Bacteria<br>(100) | Proteobacteria<br>(100) | Gammaproteobacteria<br>(100) | Vibrionales<br>(100)       | Vibrionaceae<br>(100)                  | unclassified<br>(<50)              |
| OTU0323 | Bacteria<br>(100) | Actinobacteria<br>(100) | Actinobacteria<br>(100)      | Actinomycetales<br>(100)   | Actinomycetaceae<br>(100)              | <i>Varibaculum</i><br>(100)        |
| OTU0324 | Bacteria<br>(100) | Proteobacteria<br>(100) | Betaproteobacteria<br>(100)  | Neisseriales<br>(100)      | Neisseriaceae<br>(100)                 | <i>Neisseria</i><br>(100)          |
| OTU0325 | Bacteria<br>(100) | Firmicutes<br>(100)     | Bacilli<br>(100)             | Bacillales<br>(98)         | Staphylococcaceae<br>(93)              | <i>Staphylococcus</i><br>(89)      |
| OTU0326 | Bacteria<br>(100) | Proteobacteria<br>(100) | Gammaproteobacteria<br>(100) | Vibrionales<br>(100)       | Vibrionaceae<br>(100)                  | <i>Vibrio</i><br>(60)              |
| OTU0327 | Bacteria<br>(100) | Proteobacteria<br>(100) | Gammaproteobacteria<br>(100) | Vibrionales<br>(99)        | Vibrionaceae<br>(99)                   | unclassified<br>(<50)              |
| OTU0328 | Bacteria<br>(100) | Actinobacteria<br>(100) | Actinobacteria<br>(100)      | Pseudonocardiales<br>(100) | Pseudonocardiaceae<br>(70)             | unclassified<br>(<50)              |
| OTU0329 | Bacteria<br>(100) | Firmicutes<br>(100)     | Clostridia<br>(100)          | Clostridiales<br>(100)     | Peptostreptococcaceae<br>(100)         | <i>Peptostreptococcus</i><br>(100) |
| OTU0330 | Bacteria<br>(100) | Actinobacteria<br>(99)  | Actinobacteria<br>(99)       | Pseudonocardiales<br>(98)  | unclassified<br>(<50)                  | unclassified<br>(<50)              |

|         |                   |                         |                              |                            |                             |                                  |
|---------|-------------------|-------------------------|------------------------------|----------------------------|-----------------------------|----------------------------------|
| OTU0332 | Bacteria<br>(100) | Proteobacteria<br>(100) | Gammaproteobacteria<br>(100) | Vibrionales<br>(96)        | Vibrionaceae<br>(96)        | <i>Vibrio</i><br>(64)            |
| OTU0334 | Bacteria<br>(100) | Actinobacteria<br>(100) | Actinobacteria<br>(100)      | Pseudonocardiales<br>(100) | Pseudonocardiaceae<br>(77)  | unclassified<br>(<50)            |
| OTU0335 | Bacteria<br>(100) | Firmicutes<br>(100)     | Bacilli<br>(100)             | Bacillales<br>(100)        | Bacillaceae<br>(78) 1       | <i>Anoxybacillus</i><br>(68)     |
| OTU0337 | Bacteria<br>(100) | Actinobacteria<br>(99)  | Actinobacteria<br>(99)       | Pseudonocardiales<br>(99)  | Pseudonocardiaceae<br>(72)  | unclassified<br>(<50)            |
| OTU0338 | Bacteria<br>(100) | Proteobacteria<br>(100) | Gammaproteobacteria<br>(100) | Pseudomonadales<br>(99)    | Pseudomonadaceae<br>(99)    | unclassified<br>(<50)            |
| OTU0339 | Bacteria<br>(100) | Bacteroidetes<br>(100)  | Bacteroidia<br>(100)         | Bacteroidales<br>(100)     | Prevotellaceae<br>(100)     | <i>Prevotella</i><br>(100)       |
| OTU0340 | Bacteria<br>(100) | Proteobacteria<br>(100) | Gammaproteobacteria<br>(100) | Vibrionales<br>(100)       | Vibrionaceae<br>(100)       | unclassified<br>(<50)            |
| OTU0341 | Bacteria<br>(100) | Proteobacteria<br>(100) | Gammaproteobacteria<br>(100) | Oceanospirillales<br>(100) | Oceanospirillaceae<br>(100) | <i>Marinomonas</i><br>(100)      |
| OTU0342 | Bacteria<br>(100) | Actinobacteria<br>(99)  | Actinobacteria<br>(99)       | Pseudonocardiales<br>(99)  | unclassified<br>(<50)       | unclassified<br>(<50)            |
| OTU0343 | Bacteria<br>(100) | Firmicutes<br>(97)      | Bacilli<br>(97)              | Bacillales<br>(93)         | Staphylococcaceae<br>(89)   | <i>Staphylococcus</i><br>(85)    |
| OTU0344 | Bacteria<br>(100) | Actinobacteria<br>(100) | Actinobacteria<br>(100)      | Pseudonocardiales<br>(100) | Pseudonocardiaceae<br>(92)  | unclassified<br>(<50)            |
| OTU0345 | Bacteria<br>(100) | Proteobacteria<br>(100) | Gammaproteobacteria<br>(100) | Vibrionales<br>(100)       | Vibrionaceae<br>(100)       | <i>Allomonas</i><br>(57)         |
| OTU0346 | Bacteria<br>(100) | Proteobacteria<br>(100) | Gammaproteobacteria<br>(100) | Aeromonadales<br>(73)      | Aeromonadaceae<br>(73)      | <i>Aeromonas</i><br>(71)         |
| OTU0347 | Bacteria<br>(100) | Proteobacteria<br>(100) | Gammaproteobacteria<br>(100) | Chromatiales<br>(99)       | Chromatiaceae<br>(99)       | <i>Rheinheimera</i><br>(99)      |
| OTU0348 | Bacteria<br>(100) | Proteobacteria<br>(99)  | Gammaproteobacteria<br>(99)  | Xanthomonadales<br>(88)    | Xanthomonadaceae<br>(88)    | <i>Pseudoxanthomonas</i><br>(75) |
| OTU0349 | Bacteria<br>(100) | Proteobacteria<br>(100) | Alphaproteobacteria          | Rhizobiales<br>(57)        | Phyllobacteriaceae<br>(54)  | unclassified<br>(<50)            |
| OTU0350 | Bacteria<br>(100) | Proteobacteria<br>(100) | Alphaproteobacteria<br>(100) | Rhodobacterales<br>(98)    | Rhodobacteraceae<br>(98)    | unclassified<br>(<50)            |
| OTU0353 | Bacteria<br>(100) | Proteobacteria<br>(100) | Gammaproteobacteria<br>(100) | Vibrionales<br>(100)       | Vibrionaceae<br>(100)       | <i>Allomonas</i><br>(72)         |
| OTU0354 | Bacteria<br>(100) | Proteobacteria<br>(100) | Gammaproteobacteria<br>(100) | Vibrionales<br>(97)        | Vibrionaceae<br>(97)        | <i>Photobacterium</i><br>(50)    |
| OTU0356 | Bacteria<br>(100) | Proteobacteria<br>(100) | Gammaproteobacteria<br>(100) | Vibrionales<br>(100)       | Vibrionaceae<br>(100)       | <i>Allomonas</i><br>(76)         |
| OTU0358 | Bacteria<br>(100) | Actinobacteria<br>(98)  | Actinobacteria<br>(98)       | Pseudonocardiales<br>(98)  | Pseudonocardiaceae<br>(90)  | unclassified<br>(<50)            |
| OTU0359 | Bacteria<br>(100) | Proteobacteria<br>(100) | Gammaproteobacteria<br>(100) | Pseudomonadales<br>(100)   | Moraxellaceae<br>(100)      | <i>Acinetobacter</i><br>(100)    |
| OTU0360 | Bacteria<br>(100) | Firmicutes<br>(100)     | Negativicutes<br>(100)       | Selenomonadales<br>(100)   | Veillonellaceae<br>(100)    | <i>Selenomonas</i><br>(90)       |
| OTU0361 | Bacteria<br>(100) | Proteobacteria<br>(100) | Alphaproteobacteria<br>(100) | Rhizobiales<br>(87)        | Phyllobacteriaceae<br>(85)  | <i>Phyllobacterium</i><br>(85)   |

|         |                   |                                   |                              |                            |                            |                                |
|---------|-------------------|-----------------------------------|------------------------------|----------------------------|----------------------------|--------------------------------|
| OTU0362 | Bacteria<br>(100) | Proteobacteria<br>(100)           | Gammaproteobacteria<br>(100) | Vibrionales<br>(100)       | Vibrionaceae<br>(100)      | <i>vibrio</i><br>(55)          |
| OTU0363 | Bacteria<br>(100) | Proteobacteria<br>(100)           | Gammaproteobacteria<br>(100) | Vibrionales<br>(100)       | Vibrionaceae<br>(100)      | <i>Listonella</i><br>(87)      |
| OTU0364 | Bacteria<br>(100) | Proteobacteria<br>(100)           | Alphaproteobacteria<br>(100) | Rhodobacterales<br>(91)    | Rhodobacteraceae<br>(91)   | unclassified<br>(<50)          |
| OTU0365 | Bacteria<br>(100) | Proteobacteria<br>(100)           | Betaproteobacteria<br>(100)  | Burkholderiales<br>(100)   | Alcaligenaceae<br>(100)    | <i>Achromobacter</i><br>(64)   |
| OTU0366 | Bacteria<br>(100) | Actinobacteria<br>(100)           | Actinobacteria<br>(100)      | Pseudonocardiales<br>(100) | Pseudonocardiaceae<br>(93) | unclassified<br>(<50)          |
| OTU0367 | Bacteria<br>(100) | Cyanobacteria/<br>Chloroplast(56) | unclassified<br>(<50)        | unclassified<br>(<50)      | unclassified<br>(<50)      | unclassified<br>(<50)          |
| OTU0368 | Bacteria<br>(100) | Actinobacteria<br>(100)           | Actinobacteria<br>(100)      | Pseudonocardiales<br>(100) | Pseudonocardiaceae<br>(93) | unclassified<br>(<50)          |
| OTU0369 | Bacteria<br>(100) | Actinobacteria<br>(99)            | Actinobacteria<br>(99)       | Pseudonocardiales<br>(99)  | Pseudonocardiaceae<br>(77) | unclassified<br>(<50)          |
| OTU0371 | Bacteria<br>(100) | Proteobacteria<br>(100)           | Gammaproteobacteria<br>(100) | Vibrionales<br>(99)        | Vibrionaceae<br>(99)       | <i>Listonella</i><br>(84)      |
| OTU0372 | Bacteria<br>(100) | Actinobacteria<br>(99)            | Actinobacteria<br>(99)       | Pseudonocardiales<br>(99)  | Pseudonocardiaceae<br>(86) | unclassified<br>(<50)          |
| OTU0373 | Bacteria<br>(100) | Actinobacteria<br>(100)           | Actinobacteria<br>(100)      | Pseudonocardiales<br>(100) | Pseudonocardiaceae<br>(70) | unclassified<br>(<50)          |
| OTU0374 | Bacteria<br>(100) | Proteobacteria<br>(100)           | Gammaproteobacteria<br>(100) | Vibrionales<br>(99)        | Vibrionaceae<br>(99)       | unclassified<br>(<50)          |
| OTU0376 | Bacteria<br>(100) | Proteobacteria<br>(100)           | Betaproteobacteria<br>(100)  | Burkholderiales<br>(100)   | Comamonadaceae<br>(100)    | <i>Schlegelella</i><br>(92)    |
| OTU0377 | Bacteria<br>(100) | Proteobacteria<br>(100)           | Gammaproteobacteria<br>(100) | Vibrionales<br>(100)       | Vibrionaceae<br>(100)      | <i>Allomonas</i><br>(84)       |
| OTU0378 | Bacteria<br>(100) | Proteobacteria<br>(100)           | Alphaproteobacteria<br>(100) | Rhodobacterales<br>(97)    | Rhodobacteraceae<br>(97)   | unclassified<br>(<50)          |
| OTU0379 | Bacteria<br>(100) | Actinobacteria<br>(100)           | Actinobacteria<br>(100)      | Actinomycetales<br>(100)   | Actinomycetaceae<br>(100)  | <i>Actinomyces</i><br>(100)    |
| OTU0380 | Bacteria<br>(100) | Proteobacteria<br>(100)           | Gammaproteobacteria<br>(100) | Vibrionales<br>(94)        | Vibrionaceae<br>(94)       | <i>Photobacterium</i><br>(69)  |
| OTU0382 | Bacteria<br>(100) | Proteobacteria<br>(100)           | Gammaproteobacteria<br>(100) | Vibrionales<br>(92)        | Vibrionaceae<br>(92)       | <i>Salinivibrio</i><br>(58)    |
| OTU0384 | Bacteria<br>(100) | Actinobacteria<br>(100)           | Actinobacteria<br>(100)      | Pseudonocardiales<br>(100) | Pseudonocardiaceae<br>(78) | unclassified<br>(<50)          |
| OTU0385 | Bacteria<br>(100) | Proteobacteria<br>(100)           | Gammaproteobacteria<br>(100) | Vibrionales<br>(100)       | Vibrionaceae<br>(100)      | <i>Allomonas</i><br>(75)       |
| OTU0386 | Bacteria<br>(100) | Proteobacteria<br>(100)           | Alphaproteobacteria<br>(100) | Rhizobiales<br>(93)        | unclassified<br>(<50)      | unclassified<br>(<50)          |
| OTU0387 | Bacteria<br>(100) | Actinobacteria<br>(100)           | Actinobacteria<br>(100)      | Pseudonocardiales<br>(98)  | Pseudonocardiaceae<br>(85) | unclassified<br>(<50)          |
| OTU0388 | Bacteria<br>(100) | Proteobacteria<br>(100)           | Alphaproteobacteria<br>(100) | Rhodobacterales<br>(98)    | Rhodobacteraceae<br>(98)   | unclassified<br>(<50)          |
| OTU0389 | Bacteria<br>(100) | Actinobacteria<br>(100)           | Actinobacteria<br>(100)      | Corynebacteriales<br>(100) | Corynebacteriaceae<br>(94) | <i>Corynebacterium</i><br>(90) |

|         |                   |                         |                              |                            |                                |                                   |
|---------|-------------------|-------------------------|------------------------------|----------------------------|--------------------------------|-----------------------------------|
| OTU0390 | Bacteria<br>(100) | Actinobacteria<br>(100) | Actinobacteria<br>(100)      | Pseudonocardiales<br>(100) | Pseudonocardiaceae<br>(96)     | unclassified<br>(<50)             |
| OUT0391 | Bacteria<br>(100) | Proteobacteria<br>(100) | Gammaproteobacteria<br>(100) | Alteromonadales<br>(99)    | Pseudoalteromonadaceae<br>(99) | <i>Pseudoalteromonas</i><br>(97)  |
| OUT0393 | Bacteria<br>(100) | Actinobacteria<br>(80)  | Actinobacteria<br>(80)       | Pseudonocardiales<br>(79)  | Pseudonocardiaceae<br>(66)     | unclassified<br>(<50)             |
| OUT0394 | Bacteria<br>(100) | Firmicutes<br>(100)     | Bacilli<br>(100)             | Lactobacillales<br>(100)   | Streptococcaceae<br>(100)      | <i>Streptococcus</i><br>(100)     |
| OUT0395 | Bacteria<br>(100) | Proteobacteria<br>(100) | Gammaproteobacteria<br>(100) | unclassified<br>(<50)      | unclassified<br>(<50)          | unclassified<br>(<50)             |
| OUT0396 | Bacteria<br>(100) | Proteobacteria<br>(100) | Gammaproteobacteria<br>(100) | Xanthomonadales<br>(100)   | Xanthomonadaceae<br>(100)      | <i>Pseudoxanthomonas</i><br>(100) |
| OUT0397 | Bacteria<br>(100) | Proteobacteria<br>(100) | Alphaproteobacteria<br>(100) | Rhodobacterales<br>(98)    | Rhodobacteraceae<br>(98)       | unclassified<br>(<50)             |
| OUT0398 | Bacteria<br>(100) | Proteobacteria<br>(100) | Gammaproteobacteria<br>(100) | Vibrionales<br>(89)        | Vibrionaceae<br>(89)           | unclassified<br>(<50)             |
| OUT0399 | Bacteria<br>(100) | Proteobacteria<br>(100) | Gammaproteobacteria<br>(100) | Chromatiales<br>(100)      | Chromatiaceae<br>(100)         | <i>Rheinheimera</i><br>(100)      |
| OUT0400 | Bacteria<br>(100) | Proteobacteria<br>(100) | Betaproteobacteria<br>(100)  | Burkholderiales<br>(99)    | Comamonadaceae<br>(99)         | <i>Acidovorax</i><br>(87)         |
| OUT0402 | Bacteria<br>(100) | Proteobacteria<br>(100) | Gammaproteobacteria<br>(100) | Pseudomonadales<br>(77)    | Moraxellaceae<br>(77)          | <i>Acinetobacter</i><br>(71)      |
| OUT0403 | Bacteria<br>(100) | Firmicutes<br>(100)     | Bacilli<br>(100)             | Lactobacillales<br>(100)   | Streptococcaceae<br>(100)      | <i>Streptococcus</i><br>(100)     |
| OUT0404 | Bacteria<br>(100) | Actinobacteria<br>(99)  | Actinobacteria<br>(99)       | Pseudonocardiales<br>(98)  | Pseudonocardiaceae<br>(69)     | unclassified<br>(<50)             |
| OUT0405 | Bacteria<br>(100) | Proteobacteria<br>(100) | Gammaproteobacteria<br>(100) | Vibrionales<br>(100)       | Vibrionaceae<br>(100)          | <i>Allomonas</i><br>(71)          |
| OUT0406 | Bacteria<br>(100) | Actinobacteria<br>(100) | Actinobacteria<br>(100)      | Pseudonocardiales<br>(99)  | Pseudonocardiaceae<br>(90)     | unclassified<br>(<50)             |
| OUT0407 | Bacteria<br>(100) | Proteobacteria<br>(100) | Gammaproteobacteria<br>(100) | Vibrionales<br>(100)       | Vibrionaceae<br>(100)          | <i>Vibrio</i><br>(88)             |
| OUT0408 | Bacteria<br>(100) | Firmicutes<br>(100)     | Bacilli<br>(100)             | Lactobacillales<br>(100)   | Streptococcaceae<br>(100)      | <i>Streptococcus</i><br>(100)     |
| OUT0409 | Bacteria<br>(100) | Proteobacteria<br>(100) | Gammaproteobacteria<br>(100) | Aeromonadales<br>(100)     | Aeromonadaceae<br>(100)        | <i>Aeromonas</i><br>(100)         |
| OUT0410 | Bacteria<br>(100) | Actinobacteria<br>(100) | Actinobacteria<br>(100)      | Pseudonocardiales<br>(100) | Pseudonocardiaceae<br>(82)     | unclassified<br>(<50)             |
| OUT0412 | Bacteria<br>(100) | Proteobacteria<br>(100) | Gammaproteobacteria<br>(100) | Pseudomonadales<br>(100)   | Moraxellaceae<br>(100)         | <i>Acinetobacter</i><br>(100)     |
| OUT0414 | Bacteria<br>(100) | Proteobacteria<br>(100) | Gammaproteobacteria<br>(99)  | Vibrionales<br>(88)        | Vibrionaceae<br>(88)           | <i>Allomonas</i><br>(74)          |
| OUT0415 | Bacteria<br>(100) | Proteobacteria<br>(99)  | Gammaproteobacteria<br>(99)  | Alteromonadales<br>(99)    | Pseudoalteromonadaceae<br>(88) | <i>Pseudoalteromonas</i><br>(85)  |
| OUT0416 | Bacteria<br>(100) | Actinobacteria<br>(100) | Actinobacteria<br>(100)      | Corynebacteriales<br>(100) | Corynebacteriaceae<br>(89)     | <i>Corynebacterium</i><br>(78)    |
| OUT0417 | Bacteria<br>(100) | Proteobacteria<br>(100) | Gammaproteobacteria<br>(94)  | Alteromonadales<br>(94)    | Pseudoalteromonadaceae<br>(88) | <i>Pseudoalteromonas</i><br>(81)  |



|         |                   |                         |                              |                            |                             |                                  |
|---------|-------------------|-------------------------|------------------------------|----------------------------|-----------------------------|----------------------------------|
| OUT0418 | Bacteria<br>(100) | Actinobacteria<br>(100) | Actinobacteria<br>(100)      | Pseudonocardiales<br>(100) | Pseudonocardiaceae<br>(94)  | unclassified<br>(<50)            |
| OUT0419 | Bacteria<br>(100) | Proteobacteria<br>(100) | Gammaproteobacteria<br>(100) | Vibrionales<br>(100)       | Vibrionaceae<br>(100)       | <i>Allomonas</i><br>(53)         |
| OUT0420 | Bacteria<br>(100) | Actinobacteria<br>(100) | Actinobacteria<br>(100)      | Pseudonocardiales<br>(100) | Pseudonocardiaceae<br>(72)  | unclassified<br>(<50)            |
| OUT0421 | Bacteria<br>(100) | Proteobacteria<br>(100) | Gammaproteobacteria<br>(100) | Pseudomonadales<br>(100)   | Moraxellaceae<br>(100)      | <i>Acinetobacter</i><br>(95)     |
| OUT0422 | Bacteria<br>(100) | Proteobacteria<br>(100) | Betaproteobacteria<br>(100)  | Burkholderiales<br>(100)   | Comamonadaceae<br>(92)      | unclassified<br>(<50)            |
| OUT0423 | Bacteria<br>(100) | Proteobacteria<br>(100) | Alphaproteobacteria<br>(100) | Rhodobacterales<br>(99)    | Rhodobacteraceae<br>(99)    | unclassified<br>(<50)            |
| OUT0424 | Bacteria<br>(100) | Actinobacteria<br>(100) | Actinobacteria<br>(100)      | Pseudonocardiales<br>(100) | Pseudonocardiaceae<br>(100) | <i>Actinomycetospora</i><br>(99) |
| OUT0425 | Bacteria<br>(100) | Proteobacteria<br>(100) | Alphaproteobacteria<br>(100) | Rhizobiales<br>(96)        | Phyllobacteriaceae<br>(95)  | <i>Phyllobacterium</i><br>(93)   |
| OUT0426 | Bacteria<br>(100) | Actinobacteria<br>(100) | Actinobacteria<br>(100)      | Pseudonocardiales<br>(97)  | Pseudonocardiaceae<br>(88)  | unclassified<br>(<50)            |
| OUT0427 | Bacteria<br>(100) | Actinobacteria<br>(100) | Actinobacteria<br>(100)      | Pseudonocardiales<br>(99)  | Pseudonocardiaceae<br>(97)  | unclassified<br>(<50)            |
| OUT0428 | Bacteria<br>(100) | Proteobacteria<br>(100) | Gammaproteobacteria<br>(100) | Pseudomonadales<br>(100)   | Moraxellaceae<br>(100)      | <i>Acinetobacter</i><br>(100)    |
| OUT0429 | Bacteria<br>(100) | Proteobacteria<br>(100) | Gammaproteobacteria<br>(100) | Vibrionales<br>(95)        | Vibrionaceae<br>(95)        | unclassified<br>(<50)            |
| OUT0430 | Bacteria<br>(100) | Proteobacteria<br>(100) | Gammaproteobacteria<br>(100) | Vibrionales<br>(98)        | Vibrionaceae<br>(98)        | unclassified<br>(<50)            |
| OUT0431 | Bacteria<br>(100) | Proteobacteria<br>(100) | Gammaproteobacteria<br>(100) | Enterobacteriales<br>(100) | Enterobacteriaceae<br>(100) | unclassified<br>(<50)            |
| OUT0432 | Bacteria<br>(100) | Proteobacteria<br>(100) | Gammaproteobacteria<br>(100) | Vibrionales<br>(100)       | Vibrionaceae<br>(100)       | <i>Allomonas</i><br>(51)         |
| OUT0433 | Bacteria<br>(100) | Proteobacteria<br>(100) | Gammaproteobacteria<br>(100) | Vibrionales<br>(100)       | Vibrionaceae<br>(100)       | <i>Vibrio</i><br>(75)            |
| OUT0434 | Bacteria<br>(100) | Actinobacteria<br>(100) | Actinobacteria<br>(100)      | Corynebacteriales<br>(100) | Corynebacteriaceae<br>(96)  | <i>Corynebacterium</i><br>(94)   |
| OUT0435 | Bacteria<br>(100) | Proteobacteria<br>(100) | Alphaproteobacteria<br>(100) | Rhodobacterales<br>(56)    | Rhodobacteraceae<br>(56)    | unclassified<br>(<50)            |
| OUT0436 | Bacteria<br>(100) | Actinobacteria<br>(99)  | Actinobacteria<br>(99)       | Pseudonocardiales<br>(99)  | unclassified<br>(<50)       | unclassified<br>(<50)            |
| OUT0437 | Bacteria<br>(100) | Actinobacteria<br>(100) | Actinobacteria<br>(100)      | Pseudonocardiales<br>(98)  | Pseudonocardiaceae<br>(84)  | <i>Saccharopolyspora</i><br>(65) |
| OUT0438 | Bacteria<br>(100) | Actinobacteria<br>(100) | Actinobacteria<br>(100)      | Pseudonocardiales<br>(100) | Pseudonocardiaceae<br>(70)  | unclassified<br>(<50)            |
| OUT0439 | Bacteria<br>(100) | Proteobacteria<br>(100) | Gammaproteobacteria<br>(100) | Pseudomonadales<br>(99)    | Pseudomonadaceae<br>(99)    | <i>Pseudomonas</i><br>(91)       |
| OUT0440 | Bacteria<br>(100) | Proteobacteria<br>(100) | Gammaproteobacteria<br>(100) | Vibrionales<br>(100)       | Vibrionaceae<br>(100)       | <i>Vibrio</i><br>(88)            |

|         |                   |                         |                              |                            |                             |                                   |
|---------|-------------------|-------------------------|------------------------------|----------------------------|-----------------------------|-----------------------------------|
| OUT0441 | Bacteria<br>(100) | Proteobacteria<br>(100) | Deltaproteobacteria<br>(100) | Desulfobacterales<br>(100) | Desulfobacteraceae<br>(100) | <i>Desulfatibacillum</i><br>(100) |
| OUT0442 | Bacteria<br>(100) | Proteobacteria<br>(100) | Gammaproteobacteria<br>(100) | Pseudomonadales<br>(98)    | Moraxellaceae<br>(98)       | <i>Acinetobacter</i><br>(96)      |
| OUT0443 | Bacteria<br>(100) | Actinobacteria<br>(100) | Actinobacteria<br>(100)      | Pseudonocardiales<br>(100) | Pseudonocardiaceae<br>(90)  | unclassified<br>(<50)             |
| OUT0444 | Bacteria<br>(100) | Actinobacteria<br>(100) | Actinobacteria<br>(100)      | Pseudonocardiales<br>(100) | unclassified<br>(<50)       | unclassified<br>(<50)             |
| OUT0445 | Bacteria<br>(100) | Proteobacteria<br>(100) | Alphaproteobacteria<br>(100) | Rhizobiales<br>(98)        | Phyllobacteriaceae<br>(98)  | <i>Phyllobacterium</i><br>(98)    |
| OUT0446 | Bacteria<br>(100) | Proteobacteria<br>(100) | Alphaproteobacteria<br>(100) | Rhizobiales<br>(68)        | Phyllobacteriaceae<br>(65)  | <i>Phyllobacterium</i><br>(65)    |
| OUT0447 | Bacteria<br>(100) | Proteobacteria<br>(100) | Gammaproteobacteria<br>(100) | Oceanospirillales<br>(100) | Alcanivoracaceae<br>(100)   | <i>Alcanivorax</i><br>(100)       |
| OUT0448 | Bacteria<br>(100) | Proteobacteria<br>(100) | Gammaproteobacteria<br>(100) | Aeromonadales<br>(70)      | Aeromonadaceae<br>(68)      | unclassified<br>(<50)             |
| OUT0449 | Bacteria<br>(100) | Proteobacteria<br>(100) | Gammaproteobacteria<br>(100) | Vibrionales<br>(83)        | Vibrionaceae<br>(83)        | <i>Photobacterium</i><br>(52)     |
| OUT0450 | Bacteria<br>(100) | Proteobacteria<br>(100) | Gammaproteobacteria<br>(100) | Pseudomonadales<br>(100)   | Moraxellaceae<br>(100)      | <i>Acinetobacter</i><br>(100)     |
| OUT0451 | Bacteria<br>(99)  | unclassified<br>(<50)   | unclassified<br>(<50)        | unclassified<br>(<50)      | unclassified<br>(<50)       | unclassified<br>(<50)             |
| OUT0452 | Bacteria<br>(100) | Actinobacteria<br>(100) | Actinobacteria<br>(100)      | Pseudonocardiales<br>(100) | unclassified<br>(<50)       | unclassified<br>(<50)             |
| OUT0453 | Bacteria<br>(100) | Proteobacteria<br>(100) | Gammaproteobacteria<br>(99)  | Pseudomonadales<br>(96)    | Moraxellaceae<br>(96)       | <i>Acinetobacter</i><br>(86)      |
| OUT0454 | Bacteria<br>(100) | Firmicutes<br>(100)     | Bacilli<br>(100)             | Lactobacillales<br>(100)   | Lactobacillaceae<br>(100)   | <i>Lactobacillus</i><br>(95)      |
| OUT0455 | Bacteria<br>(100) | Proteobacteria<br>(100) | Gammaproteobacteria<br>(100) | Vibrionales<br>(100)       | Vibrionaceae<br>(100)       | <i>Allomonas</i><br>(84)          |
| OUT0456 | Bacteria<br>(100) | Proteobacteria<br>(100) | Gammaproteobacteria<br>(100) | Vibrionales<br>(88)        | Vibrionaceae<br>(88)        | unclassified<br>(<50)             |
| OUT0457 | Bacteria<br>(100) | Actinobacteria<br>(100) | Actinobacteria<br>(100)      | Pseudonocardiales<br>(99)  | Pseudonocardiaceae<br>(86)  | unclassified<br>(<50)             |
| OUT0458 | Bacteria<br>(100) | Proteobacteria<br>(100) | Gammaproteobacteria<br>(100) | Vibrionales<br>(100)       | Vibrionaceae<br>(100)       | <i>Allomonas</i><br>(79)          |
| OUT0459 | Bacteria<br>(100) | Proteobacteria<br>(100) | Gammaproteobacteria<br>(100) | Enterobacteriales<br>(100) | Enterobacteriaceae<br>(100) | unclassified<br>(<50)             |
| OUT0460 | Bacteria<br>(100) | Proteobacteria<br>(100) | Gammaproteobacteria<br>(100) | Vibrionales<br>(100)       | Vibrionaceae<br>(100)       | <i>Allomonas</i><br>(50)          |
| OUT0461 | Bacteria<br>(100) | Actinobacteria<br>(100) | Actinobacteria<br>(100)      | Pseudonocardiales<br>(100) | unclassified<br>(<50)       | unclassified<br>(<50)             |
| OUT0462 | Bacteria<br>(100) | Proteobacteria<br>(100) | Gammaproteobacteria<br>(100) | Vibrionales<br>(100)       | Vibrionaceae<br>(100)       | <i>Vibrio</i><br>(85)             |
| OUT0463 | Bacteria<br>(100) | Proteobacteria<br>(100) | Gammaproteobacteria<br>(100) | Vibrionales<br>(100)       | Vibrionaceae<br>(100)       | <i>Vibrio</i><br>(58)             |
| OUT0464 | Bacteria<br>(99)  | Planctomycetes<br>(56)  | Planctomycetia<br>(56)       | unclassified<br>(<50)      | unclassified<br>(<50)       | unclassified<br>(<50)             |

|         |                   |                         |                              |                             |                                        |                                  |
|---------|-------------------|-------------------------|------------------------------|-----------------------------|----------------------------------------|----------------------------------|
| OUT0465 | Bacteria<br>(100) | Proteobacteria<br>(100) | Betaproteobacteria<br>(100)  | Burkholderiales<br>(99)     | Burkholderiaceae<br>(99)               | <i>Burkholderia</i><br>(99)      |
| OUT0466 | Bacteria<br>(100) | Actinobacteria<br>(99)  | Actinobacteria<br>(99)       | Pseudonocardiales<br>(99)   | unclassified<br>(<50)                  | unclassified<br>(<50)            |
| OUT0467 | Bacteria<br>(100) | Proteobacteria<br>(100) | Gammaproteobacteria<br>(100) | Alteromonadales<br>(100)    | Pseudoalteromonadaceae<br>(98)         | <i>Pseudoalteromonas</i><br>(98) |
| OUT0468 | Bacteria<br>(100) | Actinobacteria<br>(100) | Actinobacteria<br>(100)      | Pseudonocardiales<br>(100)  | Pseudonocardiaceae<br>(93)             | unclassified<br>(<50)            |
| OUT0469 | Bacteria<br>(100) | Proteobacteria<br>(100) | Gammaproteobacteria<br>(100) | Vibrionales<br>(96)         | Vibrionaceae<br>(96)                   | unclassified<br>(<50)            |
| OUT0470 | Bacteria<br>(100) | Actinobacteria<br>(99)  | Actinobacteria<br>(99)       | Pseudonocardiales<br>(99)   | Pseudonocardiaceae<br>(75)             | unclassified<br>(<50)            |
| OUT0471 | Bacteria<br>(100) | Firmicutes<br>(100)     | Bacilli<br>(100)             | Bacillales<br>(100)         | Bacillales_Incertae Sedis XII<br>(100) | <i>Exiguobacterium</i><br>(100)  |
| OUT0472 | Bacteria<br>(100) | Proteobacteria<br>(100) | Gammaproteobacteria<br>(100) | Vibrionales<br>(98)         | Vibrionaceae<br>(98)                   | <i>Vibrio</i><br>(62)            |
| OUT0473 | Bacteria<br>(100) | Proteobacteria<br>(100) | Gammaproteobacteria<br>(100) | Pseudomonadales<br>(96)     | Pseudomonadaceae<br>(96)               | <i>Pseudomonas</i><br>(74)       |
| OUT0474 | Bacteria<br>(100) | Actinobacteria<br>(100) | Actinobacteria<br>(100)      | Pseudonocardiales<br>(100)  | unclassified<br>(<50)                  | unclassified<br>(<50)            |
| OUT0475 | Bacteria<br>(100) | Proteobacteria<br>(100) | Gammaproteobacteria<br>(100) | Aeromonadales<br>(100)      | Aeromonadaceae<br>(59)                 | unclassified<br>(<50)            |
| OUT0476 | Bacteria<br>(100) | Firmicutes<br>(100)     | Bacilli<br>(100)             | Bacillales<br>(100)         | Bacillaceae<br>(100)                   | <i>Oceanobacillus</i><br>(100)   |
| OUT0477 | Bacteria<br>(100) | Proteobacteria<br>(100) | Gammaproteobacteria<br>(100) | Vibrionales<br>(100)        | Vibrionaceae<br>(100)                  | <i>Vibrio</i><br>(66)            |
| OUT0478 | Bacteria<br>(100) | Bacteroidetes<br>(100)  | Sphingobacteria<br>(100)     | Sphingobacteriales<br>(100) | Sphingobacteriaceae<br>(100)           | <i>Sphingobacterium</i><br>(100) |
| OUT0479 | Bacteria<br>(100) | Proteobacteria<br>(100) | Alphaproteobacteria<br>(100) | Rhodobacterales<br>(62)     | Rhodobacteraceae<br>(62)               | unclassified<br>(<50)            |
| OUT0480 | Bacteria<br>(100) | Actinobacteria<br>(100) | Actinobacteria<br>(100)      | Pseudonocardiales<br>(100)  | Pseudonocardiaceae<br>(72)             | unclassified<br>(<50)            |
| OUT0481 | Bacteria<br>(100) | Proteobacteria<br>(100) | Alphaproteobacteria<br>(100) | Rhodobacterales<br>(93)     | Rhodobacteraceae<br>(93)               | <i>Amaricoccus</i><br>(81)       |
| OUT0482 | Bacteria<br>(100) | Firmicutes<br>(100)     | Bacilli<br>(100)             | Bacillales<br>(100)         | Staphylococcaceae<br>(100)             | <i>Jeotgalicoccus</i><br>(90)    |
| OUT0483 | Bacteria<br>(98)  | Bacteroidetes<br>(82)   | unclassified<br>(<50)        | unclassified<br>(<50)       | unclassified<br>(<50)                  | unclassified<br>(<50)            |
| OUT0484 | Bacteria<br>(100) | Proteobacteria<br>(100) | Gammaproteobacteria<br>(100) | Vibrionales<br>(100)        | Vibrionaceae<br>(100)                  | <i>Listonella</i><br>(57)        |
| OUT0485 | Bacteria<br>(100) | Actinobacteria<br>(100) | Actinobacteria<br>(100)      | Pseudonocardiales<br>(100)  | Pseudonocardiaceae<br>(80)             | unclassified<br>(<50)            |
| OUT0486 | Bacteria<br>(100) | Proteobacteria<br>(100) | Alphaproteobacteria<br>(100) | Rhodobacterales<br>(74)     | Rhodobacteraceae<br>(74)               | unclassified<br>(<50)            |
| OUT0487 | Bacteria<br>(100) | Proteobacteria<br>(100) | Gammaproteobacteria<br>(100) | Xanthomonadales<br>(100)    | Xanthomonadaceae<br>(100)              | <i>Stenotrophomonas</i><br>(86)  |
| OUT0488 | Bacteria<br>(100) | Bacteroidetes<br>(100)  | Bacteroidia<br>(100)         | Bacteroidales<br>(100)      | Prevotellaceae<br>(100)                | <i>Prevotella</i><br>(100)       |

|         |                   |                         |                              |                            |                                    |                               |
|---------|-------------------|-------------------------|------------------------------|----------------------------|------------------------------------|-------------------------------|
| OUT0490 | Bacteria<br>(100) | Actinobacteria<br>(96)  | Actinobacteria<br>(96)       | Pseudonocardiales<br>(95)  | Pseudonocardiaceae<br>(52)         | unclassified<br>(<50)         |
| OUT0491 | Bacteria<br>(100) | Actinobacteria<br>(97)  | Actinobacteria<br>(97)       | Pseudonocardiales<br>(95)  | Pseudonocardiaceae<br>(69)         | <i>Labedaea</i><br>(52)       |
| OUT0492 | Bacteria<br>(100) | Actinobacteria<br>(99)  | Actinobacteria<br>(99)       | Pseudonocardiales<br>(98)  | unclassified<br>(<50)              | unclassified<br>(<50)         |
| OUT0494 | Bacteria<br>(100) | Firmicutes<br>(99)      | Bacilli<br>(97)              | Lactobacillales<br>(96)    | Streptococcaceae<br>(94)           | <i>Streptococcus</i><br>(94)  |
| OUT0495 | Bacteria<br>(100) | Proteobacteria<br>(98)  | Gammaproteobacteria<br>(98)  | Enterobacteriales<br>(95)  | Enterobacteriaceae<br>(95)         | unclassified<br>(<50)         |
| OUT0497 | Bacteria<br>(100) | Actinobacteria<br>(100) | Actinobacteria<br>(100)      | Pseudonocardiales<br>(100) | Pseudonocardiaceae<br>(66)         | unclassified<br>(<50)         |
| OUT0498 | Bacteria<br>(100) | Actinobacteria<br>(100) | Actinobacteria<br>(100)      | Pseudonocardiales<br>(99)  | Pseudonocardiaceae<br>(88)         | unclassified<br>(<50)         |
| OUT0499 | Bacteria<br>(100) | Proteobacteria<br>(99)  | Gammaproteobacteria<br>(98)  | Pseudomonadales<br>(92)    | Moraxellaceae<br>(92)              | <i>Acinetobacter</i><br>(58)  |
| OUT0500 | Bacteria<br>(100) | Firmicutes<br>(100)     | Bacilli<br>(96)              | Bacillales<br>(88)         | Staphylococcaceae<br>(75)          | <i>Staphylococcus</i><br>(65) |
| OUT0501 | Bacteria<br>(100) | Proteobacteria<br>(100) | Gammaproteobacteria<br>(100) | Vibrionales<br>(100)       | Vibrionaceae<br>(100)              | <i>Listonella</i><br>(88)     |
| OUT0504 | Bacteria<br>(100) | Proteobacteria<br>(100) | Gammaproteobacteria<br>(100) | Aeromonadales<br>(92)      | Aeromonadaceae<br>(92)             | <i>Aeromonas</i><br>(89)      |
| OUT0506 | Bacteria<br>(100) | Firmicutes<br>(100)     | Clostridia<br>(100)          | Clostridiales<br>(100)     | Clostridiales_Incertae Sedis<br>XI | <i>Anaerococcus</i><br>(99)   |
| OUT0507 | Bacteria<br>(100) | Actinobacteria<br>(100) | Actinobacteria<br>(100)      | Pseudonocardiales<br>(98)  | Pseudonocardiaceae<br>(63)         | unclassified<br>(<50)         |
| OUT0511 | Bacteria<br>(100) | Proteobacteria<br>(100) | Gammaproteobacteria<br>(100) | Vibrionales<br>(100)       | Vibrionaceae<br>(100)              | <i>Allomonas</i><br>(74)      |
| OUT0512 | Bacteria<br>(100) | Proteobacteria<br>(100) | Gammaproteobacteria<br>(100) | Vibrionales<br>(100)       | Vibrionaceae<br>(100)              | <i>Allomonas</i><br>(85)      |
| OUT0513 | Bacteria<br>(100) | Firmicutes<br>(99)      | Clostridia<br>(99)           | Clostridiales<br>(99)      | Peptostreptococcaceae<br>(80)      | unclassified<br>(<50)         |
| OUT0514 | Bacteria<br>(100) | Proteobacteria<br>(100) | Gammaproteobacteria<br>(98)  | Alteromonadales<br>(58)    | unclassified<br>(<50)              | unclassified<br>(<50)         |
| OUT0516 | Bacteria<br>(100) | Actinobacteria<br>(82)  | Actinobacteria<br>(82)       | Pseudonocardiales<br>(82)  | Pseudonocardiaceae<br>(61)         | unclassified<br>(<50)         |
| OUT0517 | Bacteria<br>(100) | Proteobacteria<br>(100) | Gammaproteobacteria<br>(100) | Vibrionales<br>(100)       | Vibrionaceae<br>(100)              | <i>Allomonas</i><br>(53)      |
| OUT0519 | Bacteria<br>(100) | Proteobacteria<br>(100) | Gammaproteobacteria<br>(99)  | Alteromonadales<br>(82)    | unclassified<br>(<50)              | unclassified<br>(<50)         |
| OUT0520 | Bacteria<br>(100) | Firmicutes<br>(100)     | Negativicutes<br>(100)       | Selenomonadales<br>(100)   | Veillonellaceae<br>(100)           | <i>Dialister</i><br>(100)     |
| OUT0521 | Bacteria<br>(100) | Actinobacteria<br>(99)  | Actinobacteria<br>(99)       | Pseudonocardiales<br>(99)  | Pseudonocardiaceae<br>(64)         | unclassified<br>(<50)         |
| OUT0523 | Bacteria<br>(100) | Actinobacteria<br>(99)  | Actinobacteria<br>(99)       | Pseudonocardiales<br>(99)  | Pseudonocardiaceae<br>(79)         | unclassified<br>(<50)         |
| OUT0524 | Bacteria<br>(100) | Actinobacteria<br>(99)  | Actinobacteria<br>(99)       | Pseudonocardiales<br>(99)  | Pseudonocardiaceae<br>(84)         | unclassified<br>(<50)         |

|         |                   |                         |                              |                              |                                |                                     |
|---------|-------------------|-------------------------|------------------------------|------------------------------|--------------------------------|-------------------------------------|
| OUT0525 | Bacteria<br>(100) | Proteobacteria<br>(100) | Gammaproteobacteria<br>(100) | Vibrionales<br>(80)          | Vibrionaceae<br>(80)           | unclassified<br>(<50)               |
| OUT0530 | Bacteria<br>(100) | Proteobacteria<br>(100) | Gammaproteobacteria<br>(100) | Vibrionales<br>(100)         | Vibrionaceae<br>(100)          | <i>Allomonas</i><br>(82)            |
| OUT0531 | Bacteria<br>(100) | Proteobacteria<br>(100) | Gammaproteobacteria<br>(100) | Vibrionales<br>(100)         | Vibrionaceae<br>(100)          | <i>Lucibacterium</i><br>(69)        |
| OUT0532 | Bacteria<br>(100) | Actinobacteria<br>(100) | Actinobacteria<br>(100)      | Pseudonocardiales<br>(100)   | Pseudonocardiaceae<br>(75)     | unclassified<br>(<50)               |
| OUT0533 | Bacteria<br>(100) | Actinobacteria<br>(100) | Actinobacteria<br>(100)      | Actinomycetales<br>(100)     | Brevibacteriaceae<br>(98)      | <i>Brevibacterium</i><br>(98)       |
| OUT0534 | Bacteria<br>(100) | Actinobacteria<br>(100) | Actinobacteria<br>(100)      | Solirubrobacterales<br>(100) | Solirubrobacteraceae<br>(85)   | <i>Solirubrobacter</i><br>(85)      |
| OUT0535 | Bacteria<br>(100) | Proteobacteria<br>(100) | Gammaproteobacteria<br>(100) | Vibrionales<br>(99)          | Vibrionaceae<br>(99)           | <i>Lucibacterium</i><br>(69)        |
| OUT0536 | Bacteria<br>(100) | Actinobacteria<br>(99)  | Actinobacteria<br>(99)       | Corynebacteriales<br>(99)    | Corynebacteriaceae<br>(96)     | <i>Corynebacterium</i><br>(93)      |
| OUT0539 | Bacteria<br>(100) | Firmicutes<br>(99)      | Bacilli<br>(97)              | Bacillales<br>(93)           | Staphylococcaceae<br>(93)      | <i>Staphylococcus</i><br>(86)       |
| OUT0542 | Bacteria<br>(100) | Proteobacteria<br>(100) | Alphaproteobacteria<br>(100) | Rhodobacterales<br>(100)     | Rhodobacteraceae<br>(100)      | unclassified<br>(<50)               |
| OUT0543 | Bacteria<br>(100) | Proteobacteria<br>(93)  | Gammaproteobacteria<br>(93)  | Vibrionales<br>(92)          | Vibrionaceae<br>(92)           | <i>Allomonas</i><br>(82)            |
| OUT0544 | Bacteria<br>(100) | Proteobacteria<br>(100) | Gammaproteobacteria<br>(100) | Vibrionales<br>(100)         | Vibrionaceae<br>(100)          | <i>Vibrio</i><br>(82)               |
| OUT0545 | Bacteria<br>(100) | Proteobacteria<br>(97)  | Betaproteobacteria<br>(87)   | Neisseriales<br>(82)         | Neisseriaceae<br>(82)          | unclassified<br>(<50)               |
| OUT0546 | Bacteria<br>(100) | Proteobacteria<br>(100) | Gammaproteobacteria<br>(100) | Enterobacteriales<br>(87)    | Enterobacteriaceae<br>(87)     | <i>Escherichia/Shigella</i><br>(77) |
| OUT0547 | Bacteria<br>(100) | Proteobacteria<br>(100) | Gammaproteobacteria<br>(100) | Vibrionales<br>(100)         | Vibrionaceae<br>(100)          | <i>Listonella</i><br>(98)           |
| OUT0548 | Bacteria<br>(100) | Proteobacteria<br>(100) | Gammaproteobacteria<br>(99)  | Vibrionales<br>(82)          | Vibrionaceae<br>(82)           | unclassified<br>(<50)               |
| OUT0549 | Bacteria<br>(100) | Proteobacteria<br>(100) | Gammaproteobacteria<br>(100) | Vibrionales<br>(99)          | Vibrionaceae<br>(99)           | <i>Lucibacterium</i><br>(54)        |
| OUT0550 | Bacteria<br>(100) | Proteobacteria<br>(100) | Gammaproteobacteria<br>(99)  | Alteromonadales<br>(97)      | Pseudoalteromonadaceae<br>(80) | <i>Pseudoalteromonas</i><br>(70)    |
| OUT0551 | Bacteria<br>(100) | Proteobacteria<br>(100) | Gammaproteobacteria<br>(100) | Chromatiales<br>(97)         | Chromatiaceae<br>(97)          | <i>Rheinheimera</i><br>(97)         |
| OUT0553 | Bacteria<br>(100) | Proteobacteria<br>(100) | Alphaproteobacteria<br>(100) | Rhizobiales<br>(71)          | unclassified<br>(<50)          | unclassified<br>(<50)               |
| OUT0555 | Bacteria<br>(100) | Actinobacteria<br>(100) | Actinobacteria<br>(100)      | Pseudonocardiales<br>(100)   | unclassified<br>(<50)          | unclassified<br>(<50)               |
| OUT0556 | Bacteria<br>(100) | Proteobacteria<br>(100) | Gammaproteobacteria<br>(100) | Vibrionales<br>(100)         | Vibrionaceae<br>(100)          | <i>Aliivibrio</i><br>(100)          |
| OUT0557 | Bacteria<br>(100) | Proteobacteria<br>(100) | Gammaproteobacteria<br>(100) | Vibrionales<br>(100)         | Vibrionaceae<br>(100)          | <i>Vibrio</i><br>(73)               |
| OUT0558 | Bacteria<br>(100) | Firmicutes<br>(100)     | Negativicutes<br>(100)       | Selenomonadales<br>(100)     | Veillonellaceae<br>(100)       | <i>Negativicoccus</i><br>(100)      |

|         |                   |                         |                              |                            |                            |                              |
|---------|-------------------|-------------------------|------------------------------|----------------------------|----------------------------|------------------------------|
| OUT0560 | Bacteria<br>(100) | Proteobacteria<br>(100) | Gammaproteobacteria<br>(100) | Vibrionales<br>(100)       | Vibrionaceae<br>(100)      | <i>Allomonas</i><br>(56)     |
| OUT0562 | Bacteria<br>(100) | Actinobacteria<br>(100) | Actinobacteria<br>(100)      | Pseudonocardiales<br>(98)  | unclassified<br>(<50)      | unclassified<br>(<50)        |
| OUT0565 | Bacteria<br>(100) | Actinobacteria<br>(100) | Actinobacteria<br>(100)      | Micrococcales<br>(99)      | Micrococcaceae<br>(99)     | <i>Micrococcus</i><br>(98)   |
| OUT0566 | Bacteria<br>(100) | Actinobacteria<br>(100) | Actinobacteria<br>(100)      | Micrococcales<br>(100)     | Micrococcaceae<br>(100)    | <i>Micrococcus</i><br>(100)  |
| OUT0567 | Bacteria<br>(100) | Actinobacteria<br>(100) | Actinobacteria<br>(100)      | Pseudonocardiales<br>(100) | Pseudonocardiaceae<br>(75) | unclassified<br>(<50)        |
| OUT0568 | Bacteria<br>(100) | Proteobacteria<br>(100) | Alphaproteobacteria<br>(100) | Rhodospirillales<br>(100)  | Acetobacteraceae<br>(100)  | unclassified<br>(<50)        |
| OUT0570 | Bacteria<br>(100) | Proteobacteria<br>(100) | Gammaproteobacteria<br>(100) | Aeromonadales<br>(89)      | Aeromonadaceae<br>(89)     | <i>Aeromonas</i><br>(87)     |
| OUT0571 | Bacteria<br>(100) | Proteobacteria<br>(100) | Gammaproteobacteria<br>(100) | Vibrionales<br>(100)       | Vibrionaceae<br>(100)      | <i>Listonella</i><br>(82)    |
| OUT0572 | Bacteria<br>(100) | Proteobacteria<br>(100) | Gammaproteobacteria<br>(100) | Vibrionales<br>(74)        | Vibrionaceae<br>(74)       | unclassified<br>(<50)        |
| OUT0573 | Bacteria<br>(100) | Proteobacteria<br>(100) | Gammaproteobacteria<br>(97)  | Pseudomonadales<br>(96)    | Moraxellaceae<br>(96)      | <i>Acinetobacter</i><br>(94) |
| OUT0575 | Bacteria<br>(100) | Proteobacteria<br>(100) | Gammaproteobacteria<br>(100) | Vibrionales<br>(100)       | Vibrionaceae<br>(100)      | <i>Allomonas</i><br>(83)     |
| OUT0578 | Bacteria<br>(100) | Actinobacteria<br>(100) | Actinobacteria<br>(100)      | Pseudonocardiales<br>(100) | Pseudonocardiaceae<br>(85) | unclassified<br>(<50)        |
| OUT0579 | Bacteria<br>(100) | Proteobacteria<br>(100) | Alphaproteobacteria<br>(100) | Rhodobacterales<br>(100)   | Rhodobacteraceae<br>(100)  | <i>Gemmobacter</i><br>(96)   |
| OUT0582 | Bacteria<br>(100) | Proteobacteria<br>(98)  | Alphaproteobacteria<br>(94)  | Rhodospirillales<br>(88)   | Rhodospirillaceae<br>(71)  | unclassified<br>(<50)        |
| OUT0583 | Bacteria<br>(100) | Proteobacteria<br>(100) | Gammaproteobacteria<br>(100) | Vibrionales<br>(100)       | Vibrionaceae<br>(100)      | <i>Listonella</i><br>(71)    |
| OUT0585 | Bacteria<br>(100) | Proteobacteria<br>(99)  | Gammaproteobacteria<br>(99)  | Pseudomonadales<br>(81)    | Pseudomonadaceae<br>(81)   | unclassified<br>(<50)        |
| OUT0586 | Bacteria<br>(100) | Actinobacteria<br>(100) | Actinobacteria<br>(100)      | Pseudonocardiales<br>(100) | Pseudonocardiaceae<br>(74) | unclassified<br>(<50)        |
| OUT0587 | Bacteria<br>(100) | Proteobacteria<br>(100) | Gammaproteobacteria<br>(100) | Vibrionales<br>(100)       | Vibrionaceae<br>(100)      | <i>Allomonas</i><br>(72)     |
| OUT0589 | Bacteria<br>(100) | Proteobacteria<br>(100) | Gammaproteobacteria<br>(100) | Vibrionales<br>(100)       | Vibrionaceae<br>(100)      | <i>Allomonas</i><br>(61)     |
| OUT0590 | Bacteria<br>(100) | Proteobacteria<br>(100) | Gammaproteobacteria<br>(100) | Vibrionales<br>(100)       | Vibrionaceae<br>(100)      | <i>Allomonas</i><br>(53)     |
| OUT0591 | Bacteria<br>(100) | Proteobacteria<br>(100) | Gammaproteobacteria<br>(100) | Vibrionales<br>(82)        | Vibrionaceae<br>(82)       | unclassified<br>(<50)        |
| OUT0592 | Bacteria<br>(100) | Actinobacteria<br>(98)  | Actinobacteria<br>(98)       | Pseudonocardiales<br>(98)  | Pseudonocardiaceae<br>(64) | unclassified<br>(<50)        |
| OUT0594 | Bacteria<br>(100) | Actinobacteria<br>(99)  | Actinobacteria<br>(99)       | Pseudonocardiales<br>(99)  | Pseudonocardiaceae<br>(80) | unclassified<br>(<50)        |
| OUT0596 | Bacteria<br>(100) | Proteobacteria<br>(100) | Gammaproteobacteria<br>(100) | Vibrionales<br>(100)       | Vibrionaceae<br>(100)      | <i>Allomonas</i><br>(72)     |

|         |                   |                         |                              |                            |                                         |                              |
|---------|-------------------|-------------------------|------------------------------|----------------------------|-----------------------------------------|------------------------------|
| OUT0597 | Bacteria<br>(100) | Proteobacteria<br>(100) | Gammaproteobacteria<br>(100) | Vibrionales<br>(100)       | Vibrionaceae<br>(100)                   | <i>Allomonas</i><br>(78)     |
| OUT0598 | Bacteria<br>(100) | Proteobacteria<br>(100) | Gammaproteobacteria<br>(100) | Vibrionales<br>(100)       | Vibrionaceae<br>(100)                   | <i>Listonella</i><br>(70)    |
| OUT0599 | Bacteria<br>(100) | Proteobacteria<br>(100) | Gammaproteobacteria<br>(100) | Vibrionales<br>(99)        | Vibrionaceae<br>(99)                    | <i>Lucibacterium</i><br>(67) |
| OUT0600 | Bacteria<br>(100) | Proteobacteria<br>(100) | Gammaproteobacteria<br>(100) | Vibrionales<br>(100)       | Vibrionaceae<br>(100)                   | <i>Listonella</i><br>(89)    |
| OUT0601 | Bacteria<br>(100) | Proteobacteria<br>(100) | Gammaproteobacteria<br>(100) | Vibrionales<br>(100)       | Vibrionaceae<br>(100)                   | <i>Allomonas</i><br>(90)     |
| OUT0602 | Bacteria<br>(100) | Firmicutes<br>(100)     | Bacilli<br>(100)             | Lactobacillales<br>(98)    | Enterococcaceae<br>(74)                 | unclassified<br>(<50)        |
| OUT0603 | Bacteria<br>(100) | Firmicutes<br>(99)      | Clostridia<br>(99)           | Clostridiales<br>(99)      | Clostridiales_Incertae Sedis<br>XI (99) | <i>Anaerococcus</i><br>(99)  |
| OUT0606 | Bacteria<br>(100) | Proteobacteria<br>(100) | Gammaproteobacteria<br>(100) | Pseudomonadales<br>(100)   | Moraxellaceae<br>(100)                  | <i>Acinetobacter</i><br>(99) |
| OUT0607 | Bacteria<br>(100) | Proteobacteria<br>(100) | Gammaproteobacteria<br>(100) | Vibrionales<br>(88)        | Vibrionaceae<br>(88)                    | unclassified<br>(<50)        |
| OUT0609 | Bacteria<br>(100) | Actinobacteria<br>(80)  | Actinobacteria<br>(80)       | unclassified<br>(<50)      | unclassified<br>(<50)                   | unclassified<br>(<50)        |
| OUT0610 | Bacteria<br>(100) | Proteobacteria<br>(100) | Gammaproteobacteria<br>(100) | Vibrionales<br>(100)       | Vibrionaceae<br>(100)                   | <i>Allomonas</i><br>(60)     |
| OUT0611 | Bacteria<br>(100) | Proteobacteria<br>(100) | Gammaproteobacteria<br>(100) | Vibrionales<br>(100)       | Vibrionaceae<br>(100)                   | <i>Listonella</i><br>(64)    |
| OUT0612 | Bacteria<br>(100) | Proteobacteria<br>(100) | Gammaproteobacteria<br>(100) | Pseudomonadales<br>(100)   | Pseudomonadaceae<br>(100)               | <i>Pseudomonas</i><br>(84)   |
| OUT0614 | Bacteria<br>(100) | Proteobacteria<br>(100) | Gammaproteobacteria<br>(100) | Vibrionales<br>(100)       | Vibrionaceae<br>(100)                   | <i>Vibrio</i><br>(51)        |
| OUT0615 | Bacteria<br>(100) | Actinobacteria<br>(100) | Actinobacteria<br>(100)      | Pseudonocardiales<br>(100) | Pseudonocardiaceae<br>(92)              | unclassified<br>(<50)        |
| OUT0616 | Bacteria<br>(100) | Actinobacteria<br>(100) | Actinobacteria<br>(100)      | Pseudonocardiales<br>(100) | unclassified<br>(<50)                   | unclassified<br>(<50)        |
| OUT0617 | Bacteria<br>(100) | Proteobacteria<br>(99)  | Gammaproteobacteria<br>(99)  | Oceanospirillales<br>(84)  | Halomonadaceae<br>(80)                  | <i>Halomonas</i><br>(52)     |
| OUT0621 | Bacteria<br>(100) | Proteobacteria<br>(100) | Gammaproteobacteria<br>(100) | Aeromonadales<br>(100)     | Aeromonadaceae<br>(100)                 | <i>Aeromonas</i><br>(100)    |
| OUT0622 | Bacteria<br>(100) | Proteobacteria<br>(100) | Gammaproteobacteria<br>(100) | Vibrionales<br>(100)       | Vibrionaceae<br>(100)                   | <i>Listonella</i><br>(93)    |
| OUT0623 | Bacteria<br>(100) | Proteobacteria<br>(100) | Gammaproteobacteria<br>(100) | Vibrionales<br>(100)       | Vibrionaceae<br>(100)                   | <i>Vibrio</i><br>(61)        |
| OUT0624 | Bacteria<br>(100) | Actinobacteria<br>(100) | Actinobacteria<br>(100)      | Pseudonocardiales<br>(98)  | Pseudonocardiaceae<br>(72)              | unclassified<br>(<50)        |
| OUT0625 | Bacteria<br>(100) | Actinobacteria<br>(98)  | Actinobacteria<br>(98)       | Pseudonocardiales<br>(98)  | unclassified<br>(<50)                   | unclassified<br>(<50)        |
| OUT0626 | Bacteria<br>(100) | Actinobacteria<br>(100) | Actinobacteria<br>(100)      | Pseudonocardiales<br>(98)  | Pseudonocardiaceae<br>(97)              | unclassified<br>(<50)        |
| OUT0627 | Bacteria<br>(100) | Proteobacteria<br>(100) | Gammaproteobacteria<br>(100) | Vibrionales<br>(100)       | Vibrionaceae<br>(100)                   | <i>Listonella</i><br>(80)    |

|         |                   |                         |                              |                            |                            |                              |
|---------|-------------------|-------------------------|------------------------------|----------------------------|----------------------------|------------------------------|
| OUT0628 | Bacteria<br>(100) | Proteobacteria<br>(100) | Gammaproteobacteria<br>(100) | Vibrionales<br>(100)       | Vibrionaceae<br>(100)      | <i>Lucibacterium</i><br>(75) |
| OUT0629 | Bacteria<br>(100) | Actinobacteria<br>(100) | Actinobacteria<br>(100)      | Pseudonocardiales<br>(96)  | Pseudonocardiaceae<br>(70) | unclassified<br>(<50)        |
| OUT0630 | Bacteria<br>(100) | Actinobacteria<br>(100) | Actinobacteria<br>(100)      | Pseudonocardiales<br>(100) | Pseudonocardiaceae<br>(97) | unclassified<br>(<50)        |
| OUT0633 | Bacteria<br>(100) | Proteobacteria<br>(100) | Gammaproteobacteria<br>(100) | Vibrionales<br>(100)       | Vibrionaceae<br>(100)      | <i>Listonella</i><br>(51)    |
| OUT0635 | Bacteria<br>(100) | Proteobacteria<br>(100) | Gammaproteobacteria<br>(100) | Vibrionales<br>(99)        | Vibrionaceae<br>(99)       | <i>Allomonas</i><br>(69)     |
| OUT0636 | Bacteria<br>(100) | unclassified<br>(<50)   | unclassified<br>(<50)        | unclassified<br>(<50)      | unclassified<br>(<50)      | unclassified<br>(<50)        |
| OUT0639 | Bacteria<br>(100) | Proteobacteria<br>(100) | Gammaproteobacteria<br>(100) | Vibrionales<br>(100)       | Vibrionaceae<br>(100)      | <i>Lucibacterium</i><br>(61) |
| OUT0640 | Bacteria<br>(100) | Proteobacteria<br>(100) | Alphaproteobacteria<br>(100) | Sphingomonadales<br>(100)  | Sphingomonadaceae<br>(100) | <i>Sphingomonas</i><br>(100) |
| OUT0641 | Bacteria<br>(100) | Actinobacteria<br>(100) | Actinobacteria<br>(100)      | Pseudonocardiales<br>(100) | Pseudonocardiaceae<br>(72) | unclassified<br>(<50)        |
| OUT0644 | Bacteria<br>(100) | Actinobacteria<br>(99)  | Actinobacteria<br>(99)       | Pseudonocardiales<br>(98)  | Pseudonocardiaceae<br>(72) | unclassified<br>(<50)        |
| OUT0646 | Bacteria<br>(100) | Actinobacteria<br>(100) | Actinobacteria<br>(100)      | Pseudonocardiales<br>(100) | Pseudonocardiaceae<br>(74) | unclassified<br>(<50)        |
| OUT0648 | Bacteria<br>(100) | Actinobacteria<br>(99)  | Actinobacteria<br>(99)       | Micrococcales<br>(99)      | Intrasporangiaceae<br>(97) | unclassified<br>(<50)        |
| OUT0649 | Bacteria<br>(100) | Proteobacteria<br>(100) | Gammaproteobacteria<br>(100) | Chromatiales<br>(100)      | Chromatiaceae<br>(100)     | <i>Rheinheimera</i><br>(100) |
| OUT0650 | Bacteria<br>(100) | Proteobacteria<br>(100) | Gammaproteobacteria<br>(100) | Vibrionales<br>(100)       | Vibrionaceae<br>(100)      | <i>Lucibacterium</i><br>(64) |
| OUT0652 | Bacteria<br>(100) | Proteobacteria<br>(100) | Gammaproteobacteria<br>(100) | Aeromonadales<br>(73)      | Aeromonadaceae<br>(73)     | <i>Aeromonas</i><br>(62)     |
| OUT0654 | Bacteria<br>(100) | Proteobacteria<br>(100) | Gammaproteobacteria<br>(100) | Vibrionales<br>(95)        | Vibrionaceae<br>(95)       | <i>Allomonas</i><br>(64)     |
| OUT0655 | Bacteria<br>(100) | Proteobacteria<br>(100) | Gammaproteobacteria<br>(100) | Alteromonadales<br>(100)   | Alteromonadaceae<br>(100)  | <i>Salinimonas</i><br>(68)   |
| OUT0656 | Bacteria<br>(100) | Proteobacteria<br>(100) | Gammaproteobacteria<br>(100) | Vibrionales<br>(100)       | Vibrionaceae<br>(100)      | <i>Allomonas</i><br>(79)     |
| OUT0657 | Bacteria<br>(100) | Proteobacteria<br>(100) | Gammaproteobacteria<br>(99)  | Xanthomonadales<br>(98)    | Xanthomonadaceae<br>(98)   | <i>Luteimonas</i><br>(84)    |
| OUT0658 | Bacteria<br>(100) | Actinobacteria<br>(100) | Actinobacteria<br>(100)      | Pseudonocardiales<br>(100) | Pseudonocardiaceae<br>(85) | unclassified<br>(<50)        |
| OUT0659 | Bacteria<br>(100) | Actinobacteria<br>(87)  | Actinobacteria<br>(87)       | Pseudonocardiales<br>(87)  | unclassified<br>(<50)      | unclassified<br>(<50)        |
| OUT0661 | Bacteria<br>(100) | Actinobacteria<br>(100) | Actinobacteria<br>(100)      | Micrococcales<br>(100)     | Dermabacteraceae<br>(95)   | <i>Dermabacter</i><br>(73)   |
| OUT0662 | Bacteria<br>(100) | Actinobacteria<br>(100) | Actinobacteria<br>(100)      | Pseudonocardiales<br>(99)  | Pseudonocardiaceae<br>(69) | unclassified<br>(<50)        |
| OUT0664 | Bacteria<br>(100) | Actinobacteria<br>(98)  | Actinobacteria<br>(98)       | Pseudonocardiales<br>(98)  | Pseudonocardiaceae<br>(90) | unclassified<br>(<50)        |



|         |                   |                         |                              |                            |                                |                                  |
|---------|-------------------|-------------------------|------------------------------|----------------------------|--------------------------------|----------------------------------|
| OUT0665 | Bacteria<br>(100) | Proteobacteria<br>(100) | Gammaproteobacteria<br>(100) | Vibrionales<br>(100)       | Vibrionaceae<br>(100)          | <i>Allomonas</i><br>(72)         |
| OUT0666 | Bacteria<br>(100) | Actinobacteria<br>(98)  | Actinobacteria<br>(98)       | Pseudonocardiales<br>(98)  | Pseudonocardiaceae<br>(66)     | unclassified<br>(<50)            |
| OUT0667 | Bacteria<br>(100) | Actinobacteria<br>(100) | Actinobacteria<br>(100)      | Pseudonocardiales<br>(100) | Pseudonocardiaceae<br>(100)    | unclassified<br>(<50)            |
| OUT0668 | Bacteria<br>(100) | Proteobacteria<br>(100) | Gammaproteobacteria<br>(99)  | Pseudomonadales<br>(99)    | Moraxellaceae<br>(99)          | <i>Psychrobacter</i><br>(89)     |
| OUT0669 | Bacteria<br>(100) | Actinobacteria<br>(100) | Actinobacteria<br>(100)      | Pseudonocardiales<br>(100) | Pseudonocardiaceae<br>(71)     | unclassified<br>(<50)            |
| OUT0670 | Bacteria<br>(100) | Actinobacteria<br>(100) | Actinobacteria<br>(100)      | Pseudonocardiales<br>(100) | Pseudonocardiaceae<br>(72)     | unclassified<br>(<50)            |
| OUT0671 | Bacteria<br>(100) | Proteobacteria<br>(100) | Gammaproteobacteria<br>(100) | Aeromonadales<br>(100)     | Aeromonadaceae<br>(100)        | <i>Alteromonas</i><br>(70)       |
| OUT0672 | Bacteria<br>(100) | Proteobacteria<br>(100) | Gammaproteobacteria<br>(100) | Enterobacteriales<br>(99)  | Enterobacteriaceae<br>(99)     | unclassified<br>(<50)            |
| OUT0673 | Bacteria<br>(100) | Actinobacteria<br>(100) | Actinobacteria<br>(100)      | Pseudonocardiales<br>(100) | Pseudonocardiaceae<br>(72)     | unclassified<br>(<50)            |
| OUT0674 | Bacteria<br>(100) | Proteobacteria<br>(100) | Alphaproteobacteria<br>(100) | Rhodobacterales<br>(84)    | Rhodobacteraceae<br>(84)       | unclassified<br>(<50)            |
| OUT0675 | Bacteria<br>(100) | Proteobacteria<br>(100) | Gammaproteobacteria<br>(100) | Vibrionales<br>(100)       | Vibrionaceae<br>(100)          | <i>Allomonas</i><br>(83)         |
| OUT0676 | Bacteria<br>(100) | Proteobacteria<br>(100) | Gammaproteobacteria<br>(100) | Pasteurellales<br>(100)    | Pasteurellaceae<br>(100)       | unclassified<br>(<50)            |
| OUT0677 | Bacteria<br>(100) | Actinobacteria<br>(100) | Actinobacteria<br>(100)      | Pseudonocardiales<br>(98)  | Pseudonocardiaceae<br>(80)     | unclassified<br>(<50)            |
| OUT0678 | Bacteria<br>(100) | Proteobacteria<br>(98)  | Alphaproteobacteria<br>(98)  | Rhodospirillales<br>(96)   | Rhodospirillaceae<br>(96)      | <i>Pelagibius</i><br>(69)        |
| OUT0679 | Bacteria<br>(100) | Proteobacteria<br>(98)  | Gammaproteobacteria<br>(98)  | Pseudomonadales<br>(98)    | Moraxellaceae<br>(98)          | <i>Acinetobacter</i><br>(91)     |
| OUT0680 | Bacteria<br>(100) | Proteobacteria<br>(100) | Gammaproteobacteria<br>(100) | Pseudomonadales<br>(100)   | Moraxellaceae<br>(100)         | <i>Acinetobacter</i><br>(98)     |
| OUT0681 | Bacteria<br>(100) | Proteobacteria<br>(100) | Gammaproteobacteria<br>(100) | Aeromonadales<br>(79)      | Aeromonadaceae<br>(78)         | <i>Aeromonas</i><br>(77)         |
| OUT0682 | Bacteria<br>(100) | Proteobacteria<br>(100) | Gammaproteobacteria<br>(100) | Vibrionales<br>(100)       | Vibrionaceae<br>(100)          | <i>Allomonas</i><br>(86)         |
| OUT0683 | Bacteria<br>(100) | Proteobacteria<br>(100) | Gammaproteobacteria<br>(100) | Alteromonadales<br>(100)   | Alteromonadaceae<br>(100)      | unclassified<br>(<50)            |
| OUT0684 | Bacteria<br>(100) | Proteobacteria<br>(99)  | Gammaproteobacteria<br>(99)  | Vibrionales<br>(99)        | Vibrionaceae<br>(99)           | <i>Allomonas</i><br>(88)         |
| OUT0686 | Bacteria<br>(100) | Proteobacteria<br>(100) | Gammaproteobacteria<br>(100) | Alteromonadales<br>(100)   | Pseudoalteromonadaceae<br>(97) | <i>Pseudoalteromonas</i><br>(94) |
| OUT0687 | Bacteria<br>(100) | Proteobacteria<br>(100) | Alphaproteobacteria<br>(100) | Rhodobacterales<br>(100)   | Rhodobacteraceae<br>(100)      | <i>Paracoccus</i><br>(82)        |
| OUT0689 | Bacteria<br>(100) | Actinobacteria<br>(100) | Actinobacteria<br>(100)      | Pseudonocardiales<br>(100) | Pseudonocardiaceae<br>(62)     | unclassified<br>(<50)            |
| OUT0690 | Bacteria<br>(100) | Proteobacteria<br>(100) | Gammaproteobacteria<br>(100) | Pseudomonadales<br>(84)    | Pseudomonadaceae<br>(82)       | unclassified<br>(<50)            |

|         |                   |                         |                              |                           |                                    |                                |
|---------|-------------------|-------------------------|------------------------------|---------------------------|------------------------------------|--------------------------------|
| OUT0691 | Bacteria<br>(100) | Proteobacteria<br>(100) | Gammaproteobacteria<br>(100) | Vibrionales<br>(100)      | Vibrionaceae<br>(100)              | <i>Allomonas</i><br>(92)       |
| OUT0693 | Bacteria<br>(100) | Actinobacteria<br>(100) | Actinobacteria<br>(100)      | Micrococcales<br>(100)    | Micrococcaceae<br>(100)            | <i>Rothia</i><br>(100)         |
| OUT0694 | Bacteria<br>(100) | Actinobacteria<br>(100) | Actinobacteria<br>(100)      | Actinomycetales<br>(99)   | unclassified<br>(<50)              | unclassified<br>(<50)          |
| OUT0695 | Bacteria<br>(100) | Proteobacteria<br>(100) | Gammaproteobacteria<br>(99)  | Enterobacteriales<br>(99) | Enterobacteriaceae<br>(99)         | unclassified<br>(<50)          |
| OUT0696 | Bacteria<br>(100) | Actinobacteria<br>(100) | Actinobacteria<br>(100)      | Pseudonocardiales<br>(99) | Pseudonocardiaceae<br>(77)         | unclassified<br>(<50)          |
| OUT0697 | Bacteria<br>(100) | Actinobacteria<br>(98)  | Actinobacteria<br>(98)       | Pseudonocardiales<br>(98) | Pseudonocardiaceae<br>(70)         | unclassified<br>(<50)          |
| OUT0699 | Bacteria<br>(98)  | Actinobacteria<br>(98)  | Actinobacteria<br>(98)       | Pseudonocardiales<br>(98) | Pseudonocardiaceae<br>(59)         | unclassified<br>(<50)          |
| OUT0700 | Bacteria<br>(100) | Proteobacteria<br>(100) | Gammaproteobacteria<br>(100) | Vibrionales<br>(98)       | Vibrionaceae<br>(98)               | <i>Salinivibrio</i><br>(54)    |
| OUT0701 | Bacteria<br>(100) | Proteobacteria<br>(100) | Gammaproteobacteria<br>(100) | Pseudomonadales<br>(99)   | Pseudomonadaceae<br>(99)           | <i>Pseudomonas</i><br>(78)     |
| OUT0702 | Bacteria<br>(100) | Actinobacteria<br>(100) | Actinobacteria<br>(100)      | Actinomycetales<br>(99)   | unclassified<br>(<50)              | unclassified<br>(<50)          |
| OUT0703 | Bacteria<br>(100) | Proteobacteria<br>(100) | Gammaproteobacteria<br>(100) | Vibrionales<br>(100)      | Vibrionaceae<br>(100)              | <i>Allomonas</i><br>(70)       |
| OUT0704 | Bacteria<br>(100) | Actinobacteria<br>(99)  | Actinobacteria<br>(99)       | Pseudonocardiales<br>(97) | Pseudonocardiaceae<br>(65)         | unclassified<br>(<50)          |
| OUT0705 | Bacteria<br>(100) | Actinobacteria<br>(100) | Actinobacteria<br>(100)      | Pseudonocardiales<br>(98) | Pseudonocardiaceae<br>(79)         | unclassified<br>(<50)          |
| OUT0708 | Bacteria<br>(100) | Proteobacteria<br>(100) | Gammaproteobacteria<br>(100) | Vibrionales<br>(100)      | Vibrionaceae<br>(100)              | <i>Allomonas</i><br>(84)       |
| OUT0709 | Bacteria<br>(100) | Proteobacteria<br>(100) | Gammaproteobacteria<br>(100) | Pseudomonadales<br>(66)   | Moraxellaceae<br>(66)              | <i>Acinetobacter</i><br>(64)   |
| OUT0710 | Bacteria<br>(100) | Firmicutes<br>(100)     | Bacilli<br>(100)             | Lactobacillales<br>(100)  | Carnobacteriaceae<br>(100)         | <i>Dolosigranulum</i><br>(100) |
| OUT0711 | Bacteria<br>(100) | Actinobacteria<br>(100) | Actinobacteria<br>(100)      | Actinomycetales<br>(100)  | unclassified<br>(<50)              | unclassified<br>(<50)          |
| OUT0712 | Bacteria<br>(100) | Proteobacteria<br>(100) | Alphaproteobacteria<br>(100) | Sphingomonadales<br>(100) | Erythrobacteraceae<br>(99)         | <i>Erythrobacter</i><br>(98)   |
| OUT0714 | Bacteria<br>(100) | Actinobacteria<br>(100) | Actinobacteria<br>(100)      | Pseudonocardiales<br>(98) | Pseudonocardiaceae<br>(80)         | unclassified<br>(<50)          |
| OUT0717 | Bacteria<br>(100) | Proteobacteria<br>(100) | Gammaproteobacteria<br>(100) | Vibrionales<br>(100)      | Vibrionaceae<br>(100)              | <i>Allomonas</i><br>(76)       |
| OUT0719 | Bacteria<br>(100) | Firmicutes<br>(100)     | Clostridia<br>(100)          | Clostridiales<br>(100)    | Clostridiales_Incertae Sedis<br>XI | <i>Anaerococcus</i><br>(99)    |
| OUT0720 | Bacteria<br>(100) | Proteobacteria<br>(100) | Gammaproteobacteria<br>(100) | Vibrionales<br>(100)      | Vibrionaceae<br>(100)              | <i>Allomonas</i><br>(57)       |
| OUT0721 | Bacteria<br>(100) | Proteobacteria<br>(99)  | Gammaproteobacteria<br>(99)  | Vibrionales<br>(87)       | Vibrionaceae<br>(87)               | <i>Allomonas</i><br>(62)       |
| OUT0722 | Bacteria<br>(100) | Proteobacteria<br>(100) | Gammaproteobacteria<br>(100) | Pasteurellales<br>(99)    | Pasteurellaceae<br>(99)            | unclassified<br>(<50)          |

|         |                   |                         |                              |                            |                             |                                     |
|---------|-------------------|-------------------------|------------------------------|----------------------------|-----------------------------|-------------------------------------|
| OUT0723 | Bacteria<br>(100) | Proteobacteria<br>(100) | Gammaproteobacteria<br>(100) | Vibrionales<br>(100)       | Vibrionaceae<br>(100)       | <i>Allomonas</i><br>(87)            |
| OUT0724 | Bacteria<br>(100) | Actinobacteria<br>(99)  | Actinobacteria<br>(99)       | Acidimicrobiales<br>(84)   | Acidimicrobiaceae<br>(74)   | unclassified<br>(<50)               |
| OUT0725 | Bacteria<br>(100) | Actinobacteria<br>(100) | Actinobacteria<br>(100)      | Micrococcales<br>(100)     | Micrococcaceae<br>(100)     | <i>Micrococcus</i><br>(97)          |
| OUT0726 | Bacteria<br>(100) | Proteobacteria<br>(100) | Gammaproteobacteria<br>(100) | Alteromonadales<br>(100)   | Alteromonadaceae<br>(100)   | <i>Salinimonas</i><br>(58)          |
| OUT0728 | Bacteria<br>(100) | Proteobacteria<br>(100) | Gammaproteobacteria<br>(99)  | Pseudomonadales<br>(87)    | Pseudomonadaceae<br>(87)    | unclassified<br>(<50)               |
| OUT0730 | Bacteria<br>(100) | Proteobacteria<br>(100) | Gammaproteobacteria<br>(100) | Vibrionales<br>(90)        | Vibrionaceae<br>(90)        | <i>Salinivibrio</i><br>(50)         |
| OUT0731 | Bacteria<br>(100) | Proteobacteria<br>(100) | Gammaproteobacteria<br>(100) | Vibrionales<br>(100)       | Vibrionaceae<br>(100)       | <i>Allomonas</i><br>(79)            |
| OUT0732 | Bacteria<br>(100) | Proteobacteria<br>(100) | Gammaproteobacteria<br>(100) | Aeromonadales<br>(99)      | Aeromonadaceae<br>(99)      | <i>Aeromonas</i><br>(99)            |
| OUT0733 | Bacteria<br>(100) | Bacteroidetes<br>(100)  | Bacteroidia<br>(100)         | Bacteroidales<br>(100)     | Prevotellaceae<br>(100)     | <i>Prevotella</i><br>(83)           |
| OUT0735 | Bacteria<br>(100) | Proteobacteria<br>(100) | Gammaproteobacteria<br>(100) | Enterobacteriales<br>(100) | Enterobacteriaceae<br>(100) | <i>Escherichia/Shigella</i><br>(89) |
| OUT0736 | Bacteria<br>(100) | Proteobacteria<br>(100) | Gammaproteobacteria<br>(100) | Vibrionales<br>(100)       | Vibrionaceae<br>(100)       | <i>Allomonas</i><br>(62)            |
| OTU0737 | Bacteria<br>(100) | Proteobacteria<br>(100) | Gammaproteobacteria<br>(100) | Alteromonadales<br>(100)   | Idiomarinaceae<br>(100)     | <i>Idiomarina</i><br>(100)          |
| OTU0738 | Bacteria<br>(100) | Proteobacteria<br>(100) | Gammaproteobacteria<br>(99)  | Pseudomonadales<br>(99)    | Moraxellaceae<br>(99)       | <i>Acinetobacter</i><br>(99)        |
| OTU0739 | Bacteria<br>(100) | Proteobacteria<br>(100) | Gammaproteobacteria<br>(100) | Vibrionales<br>(100)       | Vibrionaceae<br>(100)       | <i>Allomonas</i><br>(80)            |
| OTU0741 | Bacteria<br>(100) | Proteobacteria<br>(99)  | Gammaproteobacteria<br>(98)  | Pseudomonadales<br>(69)    | Pseudomonadaceae<br>(68)    | <i>Pseudomonas</i><br>(60)          |
| OTU0742 | Bacteria<br>(100) | Proteobacteria<br>(100) | Gammaproteobacteria<br>(100) | Vibrionales<br>(100)       | Vibrionaceae<br>(100)       | <i>Allomonas</i><br>(70)            |
| OTU0743 | Bacteria<br>(100) | Proteobacteria<br>(100) | Gammaproteobacteria<br>(100) | Vibrionales<br>(97)        | Vibrionaceae<br>(97)        | unclassified<br>(<50)               |
| OTU0744 | Bacteria<br>(100) | Actinobacteria<br>(100) | Actinobacteria<br>(100)      | Pseudonocardiales<br>(98)  | Pseudonocardiaceae<br>(78)  | unclassified<br>(<50)               |
| OTU0745 | Bacteria<br>(100) | Proteobacteria<br>(100) | Gammaproteobacteria<br>(100) | Enterobacteriales<br>(100) | Enterobacteriaceae<br>(100) | unclassified<br>(<50)               |
| OTU0746 | Bacteria<br>(100) | Proteobacteria<br>(100) | Gammaproteobacteria<br>(100) | Vibrionales<br>(100)       | Vibrionaceae<br>(100)       | <i>Listonella</i><br>(83)           |
| OTU0747 | Bacteria<br>(100) | Actinobacteria<br>(100) | Actinobacteria<br>(100)      | Pseudonocardiales<br>(100) | Pseudonocardiaceae<br>(70)  | unclassified<br>(<50)               |
| OTU0748 | Bacteria<br>(100) | Proteobacteria<br>(99)  | Gammaproteobacteria<br>(99)  | Pseudomonadales<br>(99)    | Moraxellaceae<br>(99)       | <i>Acinetobacter</i><br>(95)        |
| OTU0750 | Bacteria<br>(100) | Actinobacteria<br>(100) | Actinobacteria<br>(100)      | Pseudonocardiales<br>(99)  | Pseudonocardiaceae<br>(90)  | unclassified<br>(<50)               |

|         |                   |                         |                              |                            |                                          |                                  |
|---------|-------------------|-------------------------|------------------------------|----------------------------|------------------------------------------|----------------------------------|
| OTU0752 | Bacteria<br>(100) | Firmicutes<br>(97)      | Bacilli<br>(96)              | Lactobacillales<br>(95)    | Streptococcaceae<br>(94)                 | <i>Streptococcus</i><br>(92)     |
| OTU0754 | Bacteria<br>(100) | Actinobacteria<br>(100) | Actinobacteria<br>(100)      | Bifidobacteriales<br>(100) | Bifidobacteriaceae<br>(100)              | <i>Scardovia</i><br>(100)        |
| OTU0757 | Bacteria<br>(100) | Proteobacteria<br>(100) | Gammaproteobacteria<br>(100) | Vibrionales<br>(100)       | Vibrionaceae<br>(100)                    | <i>Listonella</i><br>(93)        |
| OTU0759 | Bacteria<br>(100) | Proteobacteria<br>(100) | Gammaproteobacteria<br>(100) | Enterobacteriales<br>(100) | Enterobacteriaceae<br>(100)              | <i>Proteus</i><br>(99)           |
| OTU0760 | Bacteria<br>(100) | Firmicutes<br>(100)     | Bacilli<br>(100)             | Bacillales<br>(100)        | Staphylococcaceae<br>(99)                | <i>Staphylococcus</i><br>(95)    |
| OTU0762 | Bacteria<br>(100) | Proteobacteria<br>(100) | Gammaproteobacteria<br>(100) | Vibrionales<br>(99)        | Vibrionaceae<br>(99)                     | <i>Allomonas</i><br>(53)         |
| OTU0763 | Bacteria<br>(100) | Proteobacteria<br>(100) | Gammaproteobacteria<br>(100) | Vibrionales<br>(100)       | Vibrionaceae<br>(100)                    | <i>Allomonas</i><br>(84)         |
| OTU0764 | Bacteria<br>(100) | Proteobacteria<br>(100) | Gammaproteobacteria<br>(100) | Vibrionales<br>(100)       | Vibrionaceae<br>(100)                    | <i>Allomonas</i><br>(72)         |
| OTU0767 | Bacteria<br>(100) | Proteobacteria<br>(100) | Gammaproteobacteria<br>(100) | Alteromonadales<br>(100)   | Pseudoalteromonadaceae<br>(100)          | <i>Pseudoalteromonas</i><br>(99) |
| OTU0768 | Bacteria<br>(100) | Proteobacteria<br>(100) | Gammaproteobacteria<br>(100) | Vibrionales<br>(100)       | Vibrionaceae<br>(100)                    | <i>Allomonas</i><br>(53)         |
| OTU0770 | Bacteria<br>(100) | Proteobacteria<br>(100) | Gammaproteobacteria<br>(100) | Vibrionales<br>(100)       | Vibrionaceae<br>(100)                    | <i>Vibrio</i><br>(77)            |
| OTU0771 | Bacteria<br>(100) | Proteobacteria<br>(100) | Gammaproteobacteria<br>(100) | Vibrionales<br>(100)       | Vibrionaceae<br>(100)                    | <i>Listonella</i><br>(70)        |
| OTU0772 | Bacteria<br>(100) | Firmicutes<br>(100)     | Clostridia<br>(100)          | Clostridiales<br>(100)     | Clostridiales_Incertae Sedis<br>XI (100) | <i>Anaerococcus</i><br>(100)     |
| OUT0773 | Bacteria<br>(100) | Proteobacteria<br>(100) | Gammaproteobacteria<br>(100) | Pseudomonadales<br>(100)   | Moraxellaceae<br>(100)                   | <i>Acinetobacter</i><br>(98)     |
| OUT0776 | Bacteria<br>(100) | Proteobacteria<br>(100) | Gammaproteobacteria<br>(99)  | Vibrionales<br>(99)        | Vibrionaceae<br>(99)                     | <i>Listonella</i><br>(87)        |
| OUT0778 | Bacteria<br>(100) | Proteobacteria<br>(100) | Gammaproteobacteria<br>(100) | Vibrionales<br>(100)       | Vibrionaceae<br>(100)                    | <i>Allomonas</i><br>(85)         |
| OUT0780 | Bacteria<br>(100) | Actinobacteria<br>(100) | Actinobacteria<br>(100)      | Corynebacteriales<br>(100) | Corynebacteriaceae<br>(100)              | <i>Corynebacterium</i><br>(100)  |
| OUT0781 | Bacteria<br>(100) | Proteobacteria<br>(100) | Gammaproteobacteria<br>(100) | Vibrionales<br>(100)       | Vibrionaceae<br>(100)                    | <i>Allomonas</i><br>(54)         |
| OUT0782 | Bacteria<br>(100) | Bacteroidetes<br>(100)  | Flavobacteria<br>(100)       | Flavobacteriales<br>(100)  | Flavobacteriaceae<br>(100)               | <i>Chryseobacterium</i><br>(99)  |
| OUT0783 | Bacteria<br>(100) | Bacteroidetes<br>(100)  | Bacteroidia<br>(90)          | Bacteroidales<br>(90)      | Porphyromonadaceae<br>(69)               | unclassified<br>(<50)            |
| OUT0784 | Bacteria<br>(100) | Proteobacteria<br>(100) | Gammaproteobacteria<br>(100) | Alteromonadales<br>(100)   | Pseudoalteromonadaceae<br>(98)           | <i>Pseudoalteromonas</i><br>(98) |
| OUT0786 | Bacteria<br>(100) | Proteobacteria<br>(100) | Gammaproteobacteria<br>(100) | Vibrionales<br>(100)       | Vibrionaceae<br>(100)                    | <i>Lucibacterium</i><br>(63)     |
| OUT0787 | Bacteria<br>(100) | Firmicutes<br>(90)      | Bacilli<br>(86)              | Lactobacillales<br>(84)    | Streptococcaceae<br>(70)                 | <i>Streptococcus</i><br>(70)     |

|         |                   |                         |                              |                            |                             |                                |
|---------|-------------------|-------------------------|------------------------------|----------------------------|-----------------------------|--------------------------------|
| OUT0788 | Bacteria<br>(100) | Proteobacteria<br>(100) | Gammaproteobacteria<br>(100) | Enterobacteriales<br>(100) | Enterobacteriaceae<br>(100) | unclassified<br>(<50)          |
| OUT0789 | Bacteria<br>(100) | Actinobacteria<br>(100) | Actinobacteria<br>(100)      | Actinomycetales<br>(100)   | unclassified<br>(<50)       | unclassified<br>(<50)          |
| OUT0790 | Bacteria<br>(100) | Proteobacteria<br>(100) | Gammaproteobacteria<br>(100) | Vibrionales<br>(100)       | Vibrionaceae<br>(100)       | <i>Allomonas</i><br>(58)       |
| OUT0791 | Bacteria<br>(100) | Firmicutes<br>(100)     | Bacilli<br>(100)             | Lactobacillales<br>(93)    | Enterococcaceae<br>(67)     | <i>Enterococcus</i><br>(50)    |
| OUT0792 | Bacteria<br>(100) | Proteobacteria<br>(100) | Gammaproteobacteria<br>(100) | Aeromonadales<br>(73)      | Aeromonadaceae<br>(73)      | <i>Aeromonas</i><br>(67)       |
| OUT0793 | Bacteria<br>(100) | Actinobacteria<br>(100) | Actinobacteria<br>(100)      | Actinomycetales<br>(100)   | unclassified<br>(<50)       | unclassified<br>(<50)          |
| OUT0794 | Bacteria<br>(100) | Proteobacteria<br>(100) | Gammaproteobacteria<br>(100) | Aeromonadales<br>(76)      | Aeromonadaceae<br>(76)      | <i>Aeromonas</i><br>(74)       |
| OUT0795 | Bacteria<br>(100) | Actinobacteria<br>(100) | Actinobacteria<br>(100)      | Pseudonocardiales<br>(100) | Pseudonocardiaceae<br>(78)  | unclassified<br>(<50)          |
| OUT0796 | Bacteria<br>(100) | Actinobacteria<br>(100) | Actinobacteria<br>(100)      | Pseudonocardiales<br>(98)  | Pseudonocardiaceae<br>(83)  | unclassified<br>(<50)          |
| OUT0797 | Bacteria<br>(100) | Actinobacteria<br>(99)  | Actinobacteria<br>(99)       | Actinomycetales<br>(99)    | unclassified<br>(<50)       | unclassified<br>(<50)          |
| OUT0798 | Bacteria<br>(100) | Actinobacteria<br>(100) | Actinobacteria<br>(100)      | Actinomycetales<br>(99)    | unclassified<br>(<50)       | unclassified<br>(<50)          |
| OUT0799 | Bacteria<br>(100) | Proteobacteria<br>(98)  | Alphaproteobacteria<br>(100) | Rhizobiales<br>(88)        | Rhodobiaceae<br>(69)        | <i>Andersenella</i><br>(62)    |
| OUT0800 | Bacteria<br>(100) | Proteobacteria<br>(100) | Betaproteobacteria<br>(100)  | Burkholderiales<br>(99)    | unclassified<br>(<50)       | unclassified<br>(<50)          |
| OTU0801 | Bacteria<br>(100) | Proteobacteria<br>(100) | Gammaproteobacteria<br>(99)  | Pasteurellales<br>(99)     | Pasteurellaceae<br>(99)     | unclassified<br>(<50)          |
| OTU0802 | Bacteria<br>(100) | Proteobacteria<br>(100) | Gammaproteobacteria<br>(100) | Pasteurellales<br>(100)    | Pasteurellaceae<br>(100)    | <i>Haemophilus</i><br>(64)     |
| OTU0803 | Bacteria<br>(100) | Actinobacteria<br>(100) | Actinobacteria<br>(100)      | Pseudonocardiales<br>(100) | Pseudonocardiaceae<br>(86)  | unclassified<br>(<50)          |
| OTU0804 | Bacteria<br>(100) | Actinobacteria<br>(100) | Actinobacteria<br>(100)      | Pseudonocardiales<br>(100) | Pseudonocardiaceae<br>(90)  | unclassified<br>(<50)          |
| OTU0805 | Bacteria<br>(100) | Proteobacteria<br>(99)  | Gammaproteobacteria<br>(98)  | Aeromonadales<br>(51)      | Aeromonadaceae<br>(51)      | unclassified<br>(<50)          |
| OTU0806 | Bacteria<br>(99)  | Actinobacteria<br>(98)  | Actinobacteria<br>(98)       | Pseudonocardiales<br>(97)  | Pseudonocardiaceae<br>(77)  | unclassified<br>(<50)          |
| OTU0807 | Bacteria<br>(100) | Proteobacteria<br>(100) | Alphaproteobacteria<br>(100) | Rhizobiales<br>(100)       | Methylobacteriaceae<br>(89) | <i>Microvirga</i><br>(89)      |
| OTU0808 | Bacteria<br>(100) | Proteobacteria<br>(100) | Gammaproteobacteria<br>(100) | Vibrionales<br>(98)        | Vibrionaceae<br>(98)        | <i>Allomonas</i><br>(86)       |
| OTU0809 | Bacteria<br>(100) | Actinobacteria<br>(100) | Actinobacteria<br>(100)      | Actinomycetales<br>(100)   | unclassified<br>(<50)       | unclassified<br>(<50)          |
| OTU0810 | Bacteria<br>(100) | Proteobacteria<br>(99)  | Alphaproteobacteria<br>(99)  | Rhizobiales<br>(99)        | Phyllobacteriaceae<br>(99)  | <i>Phyllobacterium</i><br>(99) |

|         |                   |                         |                              |                            |                                          |                                     |
|---------|-------------------|-------------------------|------------------------------|----------------------------|------------------------------------------|-------------------------------------|
| OTU0811 | Bacteria<br>(100) | Proteobacteria<br>(100) | Betaproteobacteria<br>(100)  | Burkholderiales<br>(100)   | unclassified<br>(<50)                    | unclassified<br>(<50)               |
| OTU0812 | Bacteria<br>(100) | Actinobacteria<br>(100) | Actinobacteria<br>(100)      | Pseudonocardiales<br>(100) | Pseudonocardiaceae<br>(74)               | unclassified<br>(<50)               |
| OTU0813 | Bacteria<br>(100) | Actinobacteria<br>(100) | Actinobacteria<br>(100)      | Pseudonocardiales<br>(99)  | Pseudonocardiaceae<br>(87)               | unclassified<br>(<50)               |
| OTU0814 | Bacteria<br>(100) | Actinobacteria<br>(100) | Actinobacteria<br>(100)      | Bifidobacteriales<br>(100) | Bifidobacteriaceae<br>(100)              | <i>Gardnerella</i><br>(99)          |
| OTU0815 | Bacteria<br>(100) | Actinobacteria<br>(100) | Actinobacteria<br>(100)      | Bifidobacteriales<br>(100) | Bifidobacteriaceae<br>(100)              | <i>Gardnerella</i><br>(99)          |
| OTU0816 | Bacteria<br>(100) | Actinobacteria<br>(100) | Actinobacteria<br>(100)      | Actinomycetales<br>(99)    | unclassified<br>(<50)                    | unclassified<br>(<50)               |
| OTU0817 | Bacteria<br>(100) | Proteobacteria<br>(100) | Gammaproteobacteria<br>(100) | Vibrionales<br>(95)        | Vibrionaceae<br>(95)                     | <i>Photobacterium</i><br>(88)       |
| OTU0818 | Bacteria<br>(100) | Proteobacteria<br>(100) | Betaproteobacteria<br>(100)  | Burkholderiales<br>(100)   | Comamonadaceae<br>(86)                   | <i>Diaphorobacter</i><br>(53)       |
| OTU0819 | Bacteria<br>(100) | Actinobacteria<br>(100) | Actinobacteria<br>(100)      | Pseudonocardiales<br>(100) | Pseudonocardiaceae<br>(90)               | unclassified<br>(<50)               |
| OTU0820 | Bacteria<br>(100) | Actinobacteria<br>(98)  | Actinobacteria<br>(98)       | Pseudonocardiales<br>(96)  | Pseudonocardiaceae<br>(82)               | <i>Umezawaea</i><br>(67)            |
| OTU0821 | Bacteria<br>(100) | Proteobacteria<br>(100) | Gammaproteobacteria<br>(100) | Enterobacteriales<br>(100) | Enterobacteriaceae<br>(100)              | <i>Escherichia/Shigella</i><br>(98) |
| OTU0822 | Bacteria<br>(100) | Planctomycets<br>(90)   | Planctomycetia<br>(90)       | Planctomycetales<br>(90)   | Planctomycetaceae<br>(90)                | unclassified<br>(<50)               |
| OUT0823 | Bacteria          | Actinobacteria<br>(84)  | Actinobacteria<br>(84)       | Pseudonocardiales<br>(78)  | Pseudonocardiaceae<br>(50)               | unclassified<br>(<50)               |
| OUT0824 | Bacteria<br>(100) | Proteobacteria<br>(100) | Gammaproteobacteria<br>(100) | Vibrionales<br>(100)       | Vibrionaceae<br>(100)                    | <i>Listonella</i><br>(70)           |
| OTU0825 | Bacteria<br>(100) | Proteobacteria<br>(100) | Betaproteobacteria<br>(100)  | Burkholderiales<br>(100)   | Oxalobacteraceae<br>(100)                | <i>Massilia</i><br>(58)             |
| OTU0826 | Bacteria<br>(100) | Actinobacteria<br>(100) | Actinobacteria<br>(100)      | Pseudonocardiales<br>(100) | Pseudonocardiaceae<br>(96)               | unclassified<br>(<50)               |
| OTU0827 | Bacteria<br>(100) | Proteobacteria<br>(100) | Gammaproteobacteria<br>(100) | Pseudomonadales<br>(98)    | Moraxellaceae<br>(98)                    | <i>Acinetobacter</i><br>(95)        |
| OTU0828 | Bacteria<br>(100) | Firmicutes<br>(100)     | Bacilli<br>(100)             | Lactobacillales<br>(100)   | Streptococcaceae<br>(100)                | <i>Streptococcus</i><br>(100)       |
| OTU0829 | Bacteria<br>(100) | Proteobacteria<br>(100) | Gammaproteobacteria<br>(100) | Pseudomonadales<br>(99)    | Pseudomonadaceae<br>(88)                 | <i>Pseudomonas</i><br>(83)          |
| OTU0830 | Bacteria<br>(100) | Proteobacteria<br>(100) | Alphaproteobacteria<br>(100) | Rhizobiales<br>(100)       | Methylobacteriaceae<br>(98)              | <i>Methylobacterium</i><br>(98)     |
| OTU0831 | Bacteria<br>(100) | Firmicutes<br>(100)     | Clostridia<br>(100)          | Clostridiales<br>(100)     | Clostridiales_Incertae Sedis<br>XI (100) | <i>Anaerococcus</i><br>(100)        |
| OTU0832 | Bacteria<br>(100) | Proteobacteria<br>(100) | Gammaproteobacteria<br>(100) | Vibrionales<br>(100)       | Vibrionaceae<br>(100)                    | <i>Allomonas</i><br>(87)            |
| OTU0833 | Bacteria<br>(100) | Actinobacteria<br>(100) | Actinobacteria<br>(100)      | Pseudonocardiales<br>(100) | Pseudonocardiaceae<br>(76)               | unclassified<br>(<50)               |

|         |                   |                         |                              |                            |                                |                                  |
|---------|-------------------|-------------------------|------------------------------|----------------------------|--------------------------------|----------------------------------|
| OTU0834 | Bacteria<br>(100) | Proteobacteria<br>(100) | Gammaproteobacteria<br>(100) | Pasteurellales<br>(100)    | Pasteurellaceae<br>(100)       | <i>Aggregatibacter</i><br>(55)   |
| OTU0835 | Bacteria<br>(100) | Proteobacteria<br>(100) | Gammaproteobacteria<br>(100) | Aeromonadales<br>(88)      | Aeromonadaceae<br>(88)         | <i>Aeromonas</i><br>(81)         |
| OTU0836 | Bacteria<br>(100) | Proteobacteria<br>(100) | Gammaproteobacteria<br>(100) | Vibrionales<br>(100)       | Vibrionaceae<br>(100)          | <i>Listonella</i><br>(70)        |
| OTU0837 | Bacteria<br>(100) | Proteobacteria<br>(100) | Gammaproteobacteria<br>(100) | Enterobacteriales<br>(100) | Enterobacteriaceae<br>(100)    | <i>Cronobacter</i><br>(53)       |
| OTU0838 | Bacteria<br>(100) | Proteobacteria<br>(100) | Gammaproteobacteria<br>(100) | Vibrionales<br>(100)       | Vibrionaceae<br>(100)          | <i>Allomonas</i><br>(92)         |
| OTU0839 | Bacteria<br>(100) | Proteobacteria<br>(100) | Gammaproteobacteria<br>(100) | Vibrionales<br>(100)       | Vibrionaceae<br>(100)          | <i>Lucibacterium</i><br>(50)     |
| OTU0840 | Bacteria<br>(100) | Fusobacteria<br>(100)   | Fusobacteriia<br>(100)       | Fusobacteriales<br>(100)   | Fusobacteriaceae<br>(100)      | <i>Fusobacterium</i><br>(100)    |
| OTU0841 | Bacteria<br>(100) | Proteobacteria<br>(100) | Gammaproteobacteria<br>(100) | Alteromonadales<br>(100)   | Pseudoalteromonadaceae<br>(97) | <i>Pseudoalteromonas</i><br>(96) |
| OTU0842 | Bacteria<br>(100) | Actinobacteria<br>(100) | Actinobacteria<br>(100)      | Pseudonocardiales<br>(100) | Pseudonocardiaceae<br>(85)     | unclassified<br>(<50)            |
| OTU0843 | Bacteria<br>(100) | Proteobacteria<br>(100) | Alphaproteobacteria<br>(100) | Rhodobacterales<br>(98)    | Rhodobacteraceae<br>(98)       | <i>Paracoccus</i><br>(67)        |
| OTU0844 | Bacteria<br>(100) | Firmicutes<br>(97)      | Bacilli<br>(84)              | Bacillales<br>(70)         | Staphylococcaceae<br>(64)      | unclassified<br>(<50)            |
| OTU0845 | Bacteria<br>(100) | Firmicutes<br>(99)      | Bacilli<br>(97)              | Bacillales<br>(89)         | Bacillaceae2<br>(65)           | unclassified<br>(<50)            |
| OTU0846 | Bacteria<br>(100) | Fusobacteria<br>(100)   | Fusobacteriia<br>(100)       | Fusobacteriales<br>(100)   | Fusobacteriaceae<br>(100)      | <i>Cetobacterium</i><br>(96)     |
| OTU0847 | Bacteria<br>(100) | Proteobacteria<br>(100) | Alphaproteobacteria<br>(100) | unclassified<br>(<50)      | unclassified<br>(<50)          | unclassified<br>(<50)            |
| OTU0848 | Bacteria<br>(100) | Actinobacteria<br>(100) | Actinobacteria<br>(100)      | Pseudonocardiales<br>(100) | Pseudonocardiaceae<br>(84)     | unclassified<br>(<50)            |
| OUT0849 | Bacteria<br>(100) | Actinobacteria<br>(100) | Actinobacteria<br>(100)      | Pseudonocardiales<br>(100) | Pseudonocardiaceae<br>(85)     | unclassified<br>(<50)            |
| OUT0850 | Bacteria<br>(100) | Proteobacteria<br>(100) | Gammaproteobacteria<br>(100) | Vibrionales<br>(100)       | Vibrionaceae<br>(100)          | <i>Listonella</i><br>(81)        |
| OUT0851 | Bacteria<br>(100) | Actinobacteria<br>(100) | Actinobacteria<br>(100)      | Actinomycetales<br>(100)   | unclassified<br>(<50)          | unclassified<br>(<50)            |
| OUT0852 | Bacteria<br>(100) | Actinobacteria<br>(100) | Actinobacteria<br>(100)      | Actinomycetales<br>(100)   | unclassified<br>(<50)          | unclassified<br>(<50)            |
| OUT0853 | Bacteria<br>(100) | Proteobacteria<br>(100) | Gammaproteobacteria<br>(100) | Vibrionales<br>(100)       | Vibrionaceae<br>(100)          | <i>Vibrio</i><br>(68)            |
| OUT0854 | Bacteria<br>(100) | Actinobacteria<br>(99)  | Actinobacteria<br>(99)       | Pseudonocardiales<br>(97)  | Pseudonocardiaceae<br>(75)     | unclassified<br>(<50)            |
| OUT0855 | Bacteria<br>(100) | Actinobacteria<br>(100) | Actinobacteria<br>(100)      | Bifidobacteriales<br>(100) | Bifidobacteriaceae<br>(100)    | <i>Scardovia</i><br>(100)        |
| OUT0856 | Bacteria<br>(100) | Actinobacteria<br>(100) | Actinobacteria<br>(100)      | Actinomycetales<br>(99)    | unclassified<br>(<50)          | unclassified<br>(<50)            |

|         |                   |                         |                              |                            |                             |                                     |
|---------|-------------------|-------------------------|------------------------------|----------------------------|-----------------------------|-------------------------------------|
| OUT0857 | Bacteria<br>(100) | Actinobacteria<br>(100) | Actinobacteria<br>(100)      | Micrococcales<br>(100)     | Micrococcaceae<br>(97)      | <i>Rothia</i><br>(97)               |
| OUT0858 | Bacteria<br>(100) | Actinobacteria<br>(100) | Actinobacteria<br>(100)      | Pseudonocardiales<br>(100) | Pseudonocardiaceae<br>(65)  | unclassified<br>(<50)               |
| OUT0859 | Bacteria<br>(100) | Proteobacteria<br>(100) | Gammaproteobacteria<br>(100) | Enterobacteriales<br>(100) | Enterobacteriaceae<br>(100) | <i>Escherichia/Shigella</i><br>(81) |
| OUT0860 | Bacteria<br>(100) | Actinobacteria<br>(99)  | Actinobacteria<br>(99)       | Pseudonocardiales<br>(99)  | Pseudonocardiaceae<br>(62)  | unclassified<br>(<50)               |
| OUT0861 | Bacteria<br>(100) | Proteobacteria<br>(100) | Alphaproteobacteria<br>(100) | Rhizobiales<br>(95)        | unclassified<br>(<50)       | unclassified<br>(<50)               |
| OUT0862 | Bacteria<br>(100) | Proteobacteria<br>(100) | Gammaproteobacteria<br>(100) | Vibrionales<br>(100)       | Vibrionaceae<br>(100)       | <i>Listonella</i><br>(73)           |
| OUT0863 | Bacteria<br>(100) | Actinobacteria<br>(98)  | Actinobacteria<br>(98)       | Corynebacteriales<br>(96)  | Corynebacteriaceae<br>(91)  | <i>Corynebacterium</i><br>(88)      |
| OUT0864 | Bacteria<br>(100) | Proteobacteria<br>(100) | Gammaproteobacteria<br>(100) | Vibrionales<br>(100)       | Vibrionaceae<br>(100)       | <i>Listonella</i><br>(90)           |
| OUT0865 | Bacteria<br>(100) | Actinobacteria<br>(100) | Actinobacteria<br>(100)      | Actinomycetales<br>(100)   | unclassified<br>(<50)       | unclassified<br>(<50)               |
| OUT0866 | Bacteria<br>(100) | Proteobacteria<br>(100) | Gammaproteobacteria<br>(100) | Aeromonadales<br>(95)      | Aeromonadaceae<br>(95)      | <i>Aeromonas</i><br>(95)            |
| OUT0867 | Bacteria<br>(100) | Proteobacteria<br>(100) | Gammaproteobacteria<br>(98)  | Alteromonadales<br>(77)    | Shewanellaceae<br>(64)      | <i>Shewanella</i><br>(64)           |
| OUT0868 | Bacteria<br>(100) | Actinobacteria<br>(100) | Actinobacteria<br>(100)      | Pseudonocardiales<br>(97)  | Pseudonocardiaceae<br>(88)  | unclassified<br>(<50)               |
| OUT0869 | Bacteria<br>(100) | Bacteroidetes<br>(100)  | Bacteroidia<br>(100)         | Bacteroidales<br>(100)     | Porphyromonadaceae<br>(100) | <i>Porphyromonas</i><br>(100)       |
| OUT0870 | Bacteria<br>(100) | Actinobacteria<br>(100) | Actinobacteria<br>(100)      | Pseudonocardiales<br>(99)  | Pseudonocardiaceae<br>(87)  | unclassified<br>(<50)               |
| OUT0871 | Bacteria<br>(100) | Proteobacteria<br>(100) | Gammaproteobacteria<br>(100) | Pseudomonadales<br>(90)    | Pseudomonadaceae<br>(90)    | <i>Pseudomonas</i><br>(51)          |
| OUT0872 | Bacteria<br>(100) | Actinobacteria<br>(96)  | Actinobacteria<br>(96)       | Pseudonocardiales<br>(95)  | Pseudonocardiaceae<br>(75)  | <i>Labedaea</i><br>(55)             |
| OTU0873 | Bacteria<br>(100) | Proteobacteria<br>(100) | Alphaproteobacteria<br>(99)  | unclassified<br>(<50)      | unclassified<br>(<50)       | unclassified<br>(<50)               |
| OTU0874 | Bacteria<br>(100) | Actinobacteria<br>(98)  | Actinobacteria<br>(98)       | Pseudonocardiales<br>(98)  | Pseudonocardiaceae<br>(68)  | unclassified<br>(<50)               |
| OTU0875 | Bacteria<br>(100) | Proteobacteria<br>(100) | Alphaproteobacteria<br>(100) | Rhizobiales<br>(93)        | unclassified<br>(<50)       | unclassified<br>(<50)               |
| OTU0876 | Bacteria<br>(100) | Actinobacteria<br>(100) | Actinobacteria<br>(100)      | Actinomycetales<br>(100)   | unclassified<br>(<50)       | unclassified<br>(<50)               |
| OTU0877 | Bacteria<br>(100) | Actinobacteria<br>(100) | Actinobacteria<br>(100)      | Pseudonocardiales<br>(100) | Pseudonocardiaceae<br>(67)  | unclassified<br>(<50)               |
| OTU0878 | Bacteria<br>(100) | Proteobacteria<br>(100) | Gammaproteobacteria<br>(100) | Vibrionales<br>(100)       | Vibrionaceae<br>(100)       | <i>Allomonas</i><br>(70)            |
| OTU0879 | Bacteria<br>(100) | Actinobacteria<br>(98)  | Actinobacteria<br>(98)       | Actinomycetales<br>(96)    | unclassified<br>(<50)       | unclassified<br>(<50)               |



|         |                   |                         |                              |                            |                                      |                                 |
|---------|-------------------|-------------------------|------------------------------|----------------------------|--------------------------------------|---------------------------------|
| OTU0880 | Bacteria<br>(100) | Proteobacteria<br>(100) | Gammaproteobacteria<br>(100) | Vibrionales<br>(100)       | Vibrionaceae<br>(100)                | <i>Listonella</i><br>(96)       |
| OTU0881 | Bacteria<br>(100) | Proteobacteria<br>(100) | Gammaproteobacteria<br>(100) | Pseudomonadales<br>(100)   | Moraxellaceae<br>(100)               | <i>Acinetobacter</i><br>(100)   |
| OTU0882 | Bacteria<br>(100) | Firmicutes<br>(100)     | Bacilli<br>(100)             | Bacillales<br>(92)         | unclassified<br>(<50)                | unclassified<br>(<50)           |
| OTU0883 | Bacteria<br>(100) | Actinobacteria<br>(100) | Actinobacteria<br>(100)      | Actinomycetales<br>(100)   | unclassified<br>(<50)                | unclassified<br>(<50)           |
| OTU0884 | Bacteria<br>(100) | Actinobacteria<br>(100) | Actinobacteria<br>(100)      | Actinomycetales<br>(100)   | unclassified<br>(<50)                | unclassified<br>(<50)           |
| OTU0885 | Bacteria<br>(100) | Firmicutes<br>(99)      | Negativicutes<br>(90)        | Selenomonadales<br>(90)    | Veillonellaceae<br>(90)              | unclassified<br>(<50)           |
| OTU0886 | Bacteria<br>(100) | Actinobacteria<br>(100) | Actinobacteria<br>(100)      | Pseudonocardiales<br>(100) | Pseudonocardiaceae<br>(79)           | unclassified<br>(<50)           |
| OTU0887 | Bacteria<br>(100) | Firmicutes<br>(100)     | Bacilli<br>(99)              | Bacillales<br>(99)         | Bacillales_Incertae Sedis XI<br>(97) | <i>Gemella</i><br>(97)          |
| OTU0888 | Bacteria<br>(100) | Proteobacteria<br>(100) | Gammaproteobacteria<br>(100) | Pseudomonadales<br>(100)   | Pseudomonadaceae<br>(100)            | <i>Pseudomonas</i><br>(84)      |
| OTU0888 | Bacteria<br>(100) | Proteobacteria<br>(100) | Gammaproteobacteria<br>(100) | Pseudomonadales<br>(98)    | Pseudomonadaceae<br>(98)             | <i>Azotobacter</i><br>(63)      |
| OTU0889 | Bacteria<br>(100) | Proteobacteria<br>(100) | Alphaproteobacteria<br>(100) | Rhodobacterales<br>(90)    | Rhodobacteraceae<br>(90)             | unclassified<br>(<50)           |
| OTU0889 | Bacteria<br>(100) | Proteobacteria<br>(100) | Alphaproteobacteria<br>(100) | Rhizobiales<br>(55)        | Phyllobacteriaceae<br>(53)           | <i>Phyllobacterium</i><br>(53)  |
| OTU0890 | Bacteria<br>(100) | Firmicutes<br>(100)     | Bacilli<br>(100)             | Bacillales<br>(100)        | Planococcaceae<br>(84)               | <i>Chryseomicrobium</i><br>(80) |
| OTU0891 | Bacteria<br>(100) | Actinobacteria<br>(99)  | Actinobacteria<br>(99)       | Pseudonocardiales<br>(99)  | Pseudonocardiaceae<br>(58)           | unclassified<br>(<50)           |
| OTU0892 | Bacteria<br>(100) | Proteobacteria<br>(100) | Gammaproteobacteria<br>(100) | Aeromonadales<br>(85)      | Aeromonadaceae<br>(85)               | <i>Aeromonas</i><br>(81)        |
| OTU0892 | Bacteria<br>(100) | Proteobacteria<br>(100) | Gammaproteobacteria<br>(100) | Aeromonadales<br>(97)      | Aeromonadaceae<br>(97)               | <i>Aeromonas</i><br>(97)        |
| OTU0893 | Bacteria<br>(100) | Proteobacteria<br>(100) | Alphaproteobacteria<br>(100) | unclassified<br>(<50)      | unclassified<br>(<50)                | unclassified<br>(<50)           |
| OUT0894 | Bacteria<br>(100) | Firmicutes<br>(99)      | Bacilli<br>(99)              | Bacillales<br>(53)         | unclassified<br>(<50)                | unclassified<br>(<50)           |
| OUT0895 | Bacteria<br>(100) | Actinobacteria<br>(100) | Actinobacteria<br>(100)      | Pseudonocardiales<br>(99)  | Pseudonocardiaceae<br>(78)           | unclassified<br>(<50)           |
| OUT0896 | Bacteria<br>(100) | Actinobacteria<br>(100) | Actinobacteria<br>(100)      | Pseudonocardiales<br>(100) | Pseudonocardiaceae<br>(70)           | unclassified<br>(<50)           |
| OUT0897 | Bacteria<br>(100) | Firmicutes<br>(100)     | Bacilli<br>(100)             | Lactobacillales<br>(92)    | Enterococcaceae<br>(61)              | unclassified<br>(<50)           |
| OUT0898 | Bacteria<br>(100) | Actinobacteria<br>(100) | Actinobacteria<br>(100)      | Actinomycetales<br>(100)   | Actinomycetaceae<br>(100)            | <i>Actinomyces</i><br>(100)     |
| OUT0899 | Bacteria<br>(100) | Actinobacteria<br>(89)  | Actinobacteria<br>(89)       | Pseudonocardiales<br>(88)  | Pseudonocardiaceae<br>(75)           | <i>Labedaea</i><br>(54)         |

|         |                   |                         |                              |                             |                             |                                 |
|---------|-------------------|-------------------------|------------------------------|-----------------------------|-----------------------------|---------------------------------|
| OUT0900 | Bacteria<br>(100) | Actinobacteria<br>(100) | Actinobacteria<br>(100)      | Geodermatophylales<br>(100) | Geodermatophylaceae<br>(98) | <i>Geodermatophilus</i><br>(69) |
| OUT0901 | Bacteria<br>(100) | Actinobacteria<br>(100) | Actinobacteria<br>(100)      | Bifidobacteriales<br>(100)  | Bifidobacteriaceae<br>(100) | <i>Gardnerella</i><br>(98)      |
| OUT0902 | Bacteria<br>(100) | Actinobacteria<br>(99)  | Actinobacteria<br>(99)       | Pseudonocardiales<br>(99)   | Pseudonocardiaceae<br>(80)  | <i>Labedaea</i><br>(52)         |
| OUT0903 | Bacteria<br>(100) | Actinobacteria<br>(100) | Actinobacteria<br>(100)      | Pseudonocardiales<br>(100)  | Pseudonocardiaceae<br>(89)  | unclassified<br>(<50)           |
| OUT0904 | Bacteria<br>(100) | Proteobacteria<br>(99)  | Alphaproteobacteria<br>(99)  | Rhizobiales<br>(59)         | Phyllobacteriaceae<br>(56)  | <i>Phyllobacterium</i><br>(56)  |
| OUT0905 | Bacteria<br>(100) | Actinobacteria<br>(99)  | Actinobacteria<br>(99)       | Pseudonocardiales<br>(96)   | Pseudonocardiaceae<br>(85)  | unclassified<br>(<50)           |
| OUT0906 | Bacteria<br>(100) | Firmicutes<br>(100)     | Bacilli<br>(100)             | Bacillales<br>(92)          | Bacillaceae 2<br>(55)       | unclassified<br>(<50)           |
| OUT0907 | Bacteria<br>(100) | Proteobacteria<br>(100) | Gammaproteobacteria<br>(100) | Vibrionales<br>(96)         | Vibrionaceae<br>(96)        | unclassified<br>(<50)           |
| OUT0908 | Bacteria<br>(100) | Actinobacteria<br>(100) | Actinobacteria<br>(100)      | Pseudonocardiales<br>(100)  | Pseudonocardiaceae<br>(88)  | unclassified<br>(<50)           |
| OUT0909 | Bacteria<br>(100) | Proteobacteria<br>(100) | Gammaproteobacteria<br>(99)  | Pseudomonadales<br>(90)     | Pseudomonadaceae<br>(90)    | unclassified<br>(<50)           |
| OUT0910 | Bacteria<br>(100) | Firmicutes<br>(100)     | Bacilli<br>(100)             | Lactobacillales<br>(90)     | unclassified<br>(<50)       | unclassified<br>(<50)           |
| OUT0911 | Bacteria<br>(100) | Actinobacteria<br>(100) | Actinobacteria<br>(100)      | Pseudonocardiales<br>(94)   | Pseudonocardiaceae<br>(76)  | unclassified<br>(<50)           |
| OUT0912 | Bacteria<br>(100) | Firmicutes<br>(100)     | Negativicutes<br>(99)        | Selenomonadales<br>(99)     | Veillonellaceae<br>(99)     | <i>Veillonella</i><br>(62)      |
| OUT0913 | Bacteria<br>(100) | Actinobacteria<br>(100) | Actinobacteria<br>(100)      | Pseudonocardiales<br>(100)  | Pseudonocardiaceae<br>(85)  | unclassified<br>(<50)           |
| OUT0914 | Bacteria<br>(100) | Proteobacteria<br>(100) | Gammaproteobacteria<br>(100) | Vibrionales<br>(100)        | Vibrionaceae<br>(100)       | <i>Allomonas</i><br>(78)        |
| OUT0915 | Bacteria<br>(100) | Actinobacteria<br>(100) | Actinobacteria<br>(100)      | Pseudonocardiales<br>(100)  | Pseudonocardiaceae<br>(78)  | unclassified<br>(<50)           |
| OUT0916 | Bacteria<br>(100) | Proteobacteria<br>(100) | Gammaproteobacteria<br>(99)  | Pseudomonadales<br>(94)     | Pseudomonadaceae<br>(94)    | <i>Serpens</i><br>(60)          |
| OUT0917 | Bacteria<br>(100) | Proteobacteria<br>(100) | Alphaproteobacteria<br>(100) | Rhizobiales<br>(78)         | Phyllobacteriaceae<br>(78)  | <i>Phyllobacterium</i><br>(76)  |
| OTU0918 | Bacteria<br>(100) | Actinobacteria<br>(99)  | Actinobacteria<br>(99)       | Pseudonocardiales<br>(98)   | Pseudonocardiaceae<br>(75)  | unclassified<br>(<50)           |
| OTU0919 | Bacteria<br>(100) | Actinobacteria<br>(100) | Actinobacteria<br>(100)      | Actinomycetales<br>(100)    | unclassified<br>(<50)       | unclassified<br>(<50)           |
| OTU0920 | Bacteria<br>(100) | Proteobacteria<br>(100) | Gammaproteobacteria<br>(100) | Vibrionales<br>(97)         | Vibrionaceae<br>(97)        | <i>Allomonas</i><br>(80)        |
| OTU0921 | Bacteria<br>(100) | Actinobacteria<br>(100) | Actinobacteria<br>(100)      | Actinomycetales<br>(100)    | unclassified<br>(<50)       | unclassified<br>(<50)           |
| OTU0922 | Bacteria<br>(100) | Proteobacteria<br>(100) | Alphaproteobacteria<br>(100) | Rhodobacterales<br>(99)     | Rhodobacteraceae<br>(99)    | unclassified<br>(<50)           |

|         |                   |                         |                              |                            |                            |                                |
|---------|-------------------|-------------------------|------------------------------|----------------------------|----------------------------|--------------------------------|
| OTU0923 | Bacteria<br>(100) | Actinobacteria<br>(100) | Actinobacteria<br>(100)      | Actinomycetales<br>(100)   | unclassified<br>(<50)      | unclassified<br>(<50)          |
| OTU0924 | Bacteria<br>(100) | Proteobacteria<br>(100) | Gammaproteobacteria<br>(99)  | Pseudomonadales<br>(99)    | Moraxellaceae<br>(99)      | <i>Acinetobacter</i><br>(98)   |
| OTU0925 | Bacteria<br>(100) | Actinobacteria<br>(100) | Actinobacteria<br>(100)      | Pseudonocardiales<br>(100) | Pseudonocardiaceae<br>(83) | unclassified<br>(<50)          |
| OTU0926 | Bacteria<br>(100) | Proteobacteria<br>(100) | Alphaproteobacteria<br>(100) | Rhizobiales<br>(53)        | Phyllobacteriaceae<br>(51) | unclassified<br>(50)           |
| OTU0927 | Bacteria<br>(100) | Actinobacteria<br>(100) | Actinobacteria<br>(100)      | Actinomycetales<br>(100)   | unclassified<br>(<50)      | unclassified<br>(<50)          |
| OTU0928 | Bacteria<br>(100) | Actinobacteria<br>(100) | Actinobacteria<br>(100)      | Pseudonocardiales<br>(100) | Pseudonocardiaceae<br>(79) | unclassified<br>(<50)          |
| OTU0929 | Bacteria<br>(100) | Actinobacteria<br>(100) | Actinobacteria<br>(100)      | Pseudonocardiales<br>(100) | Pseudonocardiaceae<br>(79) | unclassified<br>(<50)          |
| OTU0930 | Bacteria<br>(100) | Actinobacteria<br>(99)  | Actinobacteria<br>(99)       | Actinomycetales<br>(99)    | unclassified<br>(<50)      | unclassified<br>(<50)          |
| OTU0931 | Bacteria<br>(100) | Actinobacteria<br>(100) | Actinobacteria<br>(100)      | Actinomycetales<br>(99)    | unclassified<br>(<50)      | unclassified<br>(<50)          |
| OTU0932 | Bacteria<br>(100) | Proteobacteria<br>(100) | Alphaproteobacteria<br>(100) | Rhizobiales<br>(90)        | Phyllobacteriaceae<br>(86) | <i>Phyllobacterium</i><br>(84) |
| OTU0933 | Bacteria<br>(100) | Proteobacteria<br>(100) | Betaproteobacteria<br>(100)  | Burkholderiales<br>(89)    | Comamonadaceae<br>(66)     | <i>Brachymonas</i><br>(62)     |
| OTU0934 | Bacteria<br>(100) | Proteobacteria<br>(100) | Alphaproteobacteria<br>(100) | unclassified<br>(<50)      | unclassified<br>(<50)      | unclassified<br>(<50)          |
| OTU0935 | Bacteria<br>(100) | Actinobacteria<br>(100) | Actinobacteria<br>(100)      | Pseudonocardiales<br>(100) | Pseudonocardiaceae<br>(75) | unclassified<br>(<50)          |
| OTU0936 | Bacteria<br>(100) | Firmicutes<br>(100)     | Bacilli<br>(100)             | Bacillales<br>(98)         | Bacillaceae<br>(81) 2      | unclassified<br>(<50)          |
| OTU0937 | Bacteria<br>(100) | Actinobacteria<br>(100) | Actinobacteria<br>(100)      | Actinomycetales<br>(100)   | unclassified<br>(<50)      | unclassified<br>(<50)          |
| OTU0938 | Bacteria<br>(100) | Actinobacteria<br>(100) | Actinobacteria<br>(100)      | Actinomycetales<br>(100)   | unclassified<br>(<50)      | unclassified<br>(<50)          |
| OTU0939 | Bacteria<br>(100) | Proteobacteria<br>(100) | Alphaproteobacteria<br>(100) | Rhizobiales<br>(97)        | Rhodobiaceae<br>(67)       | <i>Andersenella</i><br>(63)    |
| OTU0940 | Bacteria<br>(100) | Proteobacteria<br>(100) | Gammaproteobacteria<br>(100) | Vibrionales<br>(100)       | Vibrionaceae<br>(100)      | <i>Allomonas</i><br>(84)       |
| OTU0941 | Bacteria<br>(100) | Actinobacteria<br>(100) | Actinobacteria<br>(100)      | Actinomycetales<br>(100)   | unclassified<br>(<50)      | unclassified<br>(<50)          |
| OTU0942 | Bacteria<br>(100) | Firmicutes<br>(100)     | Bacilli<br>(100)             | Lactobacillales<br>(100)   | Enterococcaceae<br>(79)    | unclassified<br>(<50)          |
| OTU0943 | Bacteria<br>(100) | Proteobacteria<br>(100) | Gammaproteobacteria<br>(98)  | Vibrionales<br>(94)        | Vibrionaceae<br>(94)       | <i>Allomonas</i><br>(60)       |
| OTU0944 | Bacteria<br>(100) | Proteobacteria<br>(100) | Betaproteobacteria<br>(100)  | Burkholderiales<br>(100)   | Oxalobacteraceae<br>(100)  | <i>Duganella</i><br>(100)      |
| OTU0945 | Bacteria<br>(100) | Actinobacteria<br>(100) | Actinobacteria<br>(100)      | Actinomycetales<br>(100)   | unclassified<br>(<50)      | unclassified<br>(<50)          |

|         |                   |                         |                              |                            |                             |                                 |
|---------|-------------------|-------------------------|------------------------------|----------------------------|-----------------------------|---------------------------------|
| OTU0946 | Bacteria<br>(100) | Proteobacteria<br>(100) | Gammaproteobacteria<br>(100) | Vibrionales<br>(90)        | Vibrionaceae<br>(90)        | <i>Photobacterium</i><br>(53)   |
| OTU0947 | Bacteria<br>(100) | Actinobacteria<br>(100) | Actinobacteria<br>(100)      | Actinomycetales<br>(100)   | unclassified<br>(<50)       | unclassified<br>(<50)           |
| OTU0948 | Bacteria<br>(100) | Proteobacteria<br>(100) | Alphaproteobacteria<br>(100) | Rhodobacterales<br>(99)    | Rhodobacteraceae<br>(99)    | unclassified<br>(<50)           |
| OTU0949 | Bacteria<br>(100) | Actinobacteria<br>(100) | Actinobacteria<br>(100)      | Pseudonocardiales<br>(99)  | Pseudonocardiaceae<br>(66)  | unclassified<br>(<50)           |
| OTU0950 | Bacteria<br>(100) | Proteobacteria<br>(100) | Gammaproteobacteria<br>(100) | Pseudomonadales<br>(93)    | Pseudomonadaceae<br>(93)    | <i>Pseudomonas</i><br>(90)      |
| OTU0951 | Bacteria<br>(100) | Actinobacteria<br>(100) | Actinobacteria<br>(100)      | Pseudonocardiales<br>(100) | Pseudonocardiaceae<br>(75)  | unclassified<br>(<50)           |
| OTU0952 | Bacteria<br>(100) | Actinobacteria<br>(100) | Actinobacteria<br>(100)      | Pseudonocardiales<br>(100) | Pseudonocardiaceae<br>(87)  | unclassified<br>(<50)           |
| OTU0953 | Bacteria<br>(100) | Actinobacteria<br>(100) | Actinobacteria<br>(100)      | Pseudonocardiales<br>(100) | Pseudonocardiaceae<br>(89)  | unclassified<br>(<50)           |
| OTU0954 | Bacteria<br>(100) | Actinobacteria<br>(97)  | Actinobacteria<br>(96)       | Pseudonocardiales<br>(96)  | Pseudonocardiaceae<br>(69)  | unclassified<br>(<50)           |
| OTU0955 | Bacteria<br>(100) | Proteobacteria<br>(100) | Gammaproteobacteria<br>(100) | Pseudomonadales<br>(100)   | Pseudomonadaceae<br>(100)   | <i>Pseudomonas</i><br>(96)      |
| OTU0956 | Bacteria<br>(100) | Actinobacteria<br>(98)  | Actinobacteria<br>(98)       | Pseudonocardiales<br>(97)  | Pseudonocardiaceae<br>(78)  | unclassified<br>(<50)           |
| OTU0957 | Bacteria<br>(100) | Proteobacteria<br>(100) | Gammaproteobacteria<br>(100) | Vibrionales<br>(100)       | Vibrionaceae<br>(100)       | <i>Lucibacterium</i><br>(80)    |
| OTU0958 | Bacteria<br>(100) | Actinobacteria<br>(100) | Actinobacteria<br>(100)      | Pseudonocardiales<br>(100) | Pseudonocardiaceae<br>(78)  | unclassified<br>(<50)           |
| OTU0959 | Bacteria<br>(100) | unclassified<br>(<50)   | unclassified<br>(<50)        | unclassified<br>(<50)      | unclassified<br>(<50)       | unclassified<br>(<50)           |
| OTU0961 | Bacteria<br>(100) | Proteobacteria<br>(100) | Gammaproteobacteria<br>(100) | Pseudomonadales<br>(100)   | Moraxellaceae<br>(100)      | <i>Acinetobacter</i><br>(99)    |
| OTU0962 | Bacteria<br>(100) | Actinobacteria<br>(100) | Actinobacteria<br>(100)      | Pseudonocardiales<br>(99)  | Pseudonocardiaceae<br>(82)  | unclassified<br>(<50)           |
| OTU0964 | Bacteria<br>(100) | Actinobacteria<br>(100) | Actinobacteria<br>(100)      | Actinomycetales<br>(100)   | unclassified<br>(<50)       | unclassified<br>(<50)           |
| OTU0967 | Bacteria<br>(100) | Firmicutes<br>(96)      | Bacilli<br>(96)              | Lactobacillales<br>(88)    | Streptococcaceae<br>(88)    | <i>Streptococcus</i><br>(88)    |
| OTU0968 | Bacteria<br>(100) | Proteobacteria<br>(100) | Gammaproteobacteria<br>(100) | Vibrionales<br>(100)       | Vibrionaceae<br>(100)       | <i>Vibrio</i><br>(61)           |
| OTU0969 | Bacteria<br>(100) | Proteobacteria<br>(100) | Alphaproteobacteria<br>(100) | Rhizobiales<br>(99)        | Methylobacteriaceae<br>(88) | <i>Methylobacterium</i><br>(84) |
| OUT0970 | Bacteria<br>(100) | Proteobacteria<br>(100) | Gammaproteobacteria<br>(100) | Vibrionales<br>(100)       | Vibrionaceae<br>(100)       | <i>Lucibacterium</i><br>(76)    |
| OUT0972 | Bacteria<br>(99)  | Bacteroidetes<br>(98)   | Bacteroidia<br>(73)          | Bacteroidales<br>(73)      | Prevotellaceae<br>(68)      | <i>Alloprevotella</i><br>(56)   |
| OUT0973 | Bacteria<br>(100) | Actinobacteria<br>(100) | Actinobacteria<br>(100)      | Pseudonocardiales<br>(100) | Pseudonocardiaceae<br>(84)  | unclassified<br>(<50)           |

|         |                   |                         |                              |                            |                            |                                |
|---------|-------------------|-------------------------|------------------------------|----------------------------|----------------------------|--------------------------------|
| OUT0974 | Bacteria<br>(99)  | Actinobacteria<br>(96)  | Actinobacteria<br>(96)       | Pseudonocardiales<br>(94)  | Pseudonocardiaceae<br>(75) | unclassified<br>(<50)          |
| OUT0975 | Bacteria<br>(100) | Actinobacteria<br>(99)  | Actinobacteria<br>(99)       | Pseudonocardiales<br>(97)  | Pseudonocardiaceae<br>(70) | unclassified<br>(<50)          |
| OUT0978 | Bacteria<br>(100) | Proteobacteria<br>(100) | Gammaproteobacteria<br>(100) | Vibrionales<br>(99)        | Vibrionaceae<br>(99)       | <i>Allomonas</i><br>(52)       |
| OUT0979 | Bacteria<br>(100) | Proteobacteria<br>(100) | Gammaproteobacteria<br>(100) | Vibrionales<br>(100)       | Vibrionaceae<br>(100)      | <i>Listonella</i><br>(93)      |
| OUT0980 | Bacteria<br>(100) | Actinobacteria<br>(100) | Actinobacteria<br>(100)      | Pseudonocardiales<br>(99)  | Pseudonocardiaceae<br>(90) | unclassified<br>(<50)          |
| OUT0983 | Bacteria<br>(100) | Firmicutes<br>(100)     | Bacilli<br>(100)             | Lactobacillales<br>(100)   | Carnobacteriaceae<br>(100) | <i>Alloiococcus</i><br>(100)   |
| OUT0984 | Bacteria<br>(100) | Proteobacteria<br>(100) | Gammaproteobacteria<br>(100) | Vibrionales<br>(100)       | Vibrionaceae<br>(100)      | <i>Allomonas</i><br>(92)       |
| OUT0985 | Bacteria<br>(100) | Proteobacteria<br>(100) | Alphaproteobacteria<br>(100) | Rhizobiales<br>(79)        | Phyllobacteriaceae<br>(68) | <i>Phyllobacterium</i><br>(68) |
| OUT0987 | Bacteria<br>(100) | Firmicutes<br>(99)      | Bacilli<br>(96)              | Bacillales<br>(90)         | Staphylococcaceae<br>(70)  | <i>Staphylococcus</i><br>(64)  |
| OUT0988 | Bacteria<br>(100) | Proteobacteria<br>(100) | Gammaproteobacteria<br>(100) | Vibrionales<br>(100)       | Vibrionaceae<br>(100)      | <i>Allomonas</i><br>(77)       |
| OUT0989 | Bacteria<br>(100) | Actinobacteria<br>(84)  | Actinobacteria<br>(84)       | Actinomycetales<br>(84)    | unclassified<br>(<50)      | unclassified<br>(<50)          |
| OUT0991 | Bacteria<br>(100) | Proteobacteria<br>(100) | Gammaproteobacteria<br>(99)  | Pseudomonadales<br>(98)    | Moraxellaceae<br>(98)      | <i>Acinetobacter</i><br>(86)   |
| OUT0992 | Bacteria<br>(100) | Proteobacteria<br>(92)  | Alphaproteobacteria<br>(90)  | unclassified<br>(<50)      | unclassified<br>(<50)      | unclassified<br>(<50)          |
| OUT0993 | Bacteria<br>(100) | Actinobacteria<br>(100) | Actinobacteria<br>(100)      | Pseudonocardiales<br>(100) | Pseudonocardiaceae<br>(89) | unclassified<br>(<50)          |
| OUT0994 | Bacteria<br>(100) | Actinobacteria<br>(100) | Actinobacteria<br>(100)      | Pseudonocardiales<br>(100) | Pseudonocardiaceae<br>(84) | unclassified<br>(<50)          |
| OUT0995 | Bacteria<br>(100) | Actinobacteria<br>(100) | Actinobacteria<br>(100)      | Micrococcales<br>(100)     | Intrasporangiaceae<br>(96) | unclassified<br>(<50)          |
| OUT0996 | Bacteria<br>(100) | Actinobacteria<br>(99)  | Actinobacteria<br>(99)       | Pseudonocardiales<br>(99)  | Pseudonocardiaceae<br>(76) | unclassified<br>(<50)          |
| OUT0997 | Bacteria<br>(100) | Proteobacteria<br>(100) | Gammaproteobacteria<br>(100) | Pseudomonadales<br>(100)   | Moraxellaceae<br>(100)     | <i>Acinetobacter</i><br>(99)   |
| OUT0998 | Bacteria<br>(100) | Proteobacteria<br>(100) | Gammaproteobacteria<br>(100) | Vibrionales<br>(100)       | Vibrionaceae<br>(100)      | <i>Allomonas</i><br>(51)       |
| OUT1000 | Bacteria<br>(100) | Firmicutes<br>(100)     | Bacilli<br>(100)             | Bacillales<br>(97)         | unclassified<br>(<50)      | unclassified<br>(<50)          |
| OUT1001 | Bacteria<br>(100) | Proteobacteria<br>(100) | Gammaproteobacteria<br>(100) | Vibrionales<br>(92)        | Vibrionaceae<br>(92)       | <i>Allomonas</i><br>(65)       |
| OTU1003 | Bacteria<br>(100) | Proteobacteria<br>(100) | Gammaproteobacteria<br>(100) | Vibrionales<br>(75)        | Vibrionaceae<br>(75)       | unclassified<br>(<50)          |
| OTU1004 | Bacteria<br>(100) | Proteobacteria<br>(100) | Gammaproteobacteria<br>(100) | Vibrionales<br>(94)        | Vibrionaceae<br>(94)       | <i>Lucibacterium</i><br>(50)   |

|         |                   |                         |                              |                            |                            |                                  |
|---------|-------------------|-------------------------|------------------------------|----------------------------|----------------------------|----------------------------------|
| OTU1005 | Bacteria<br>(100) | Proteobacteria<br>(100) | Gammaproteobacteria<br>(99)  | Vibrionales<br>(99)        | Vibrionaceae<br>(99)       | <i>Allomonas</i><br>(83)         |
| OTU1006 | Bacteria<br>(100) | Proteobacteria<br>(100) | Gammaproteobacteria<br>(100) | Pasteurellales<br>(100)    | Pasteurellaceae<br>(100)   | unclassified<br>(<50)            |
| OTU1007 | Bacteria<br>(100) | Proteobacteria<br>(97)  | Alphaproteobacteria<br>(92)  | Sphingomonadales<br>(76)   | Sphingomonadaceae<br>(75)  | <i>Sphingobium</i><br>(53)       |
| OTU1008 | Bacteria<br>(100) | Actinobacteria<br>(82)  | Actinobacteria<br>(82)       | Pseudonocardiales<br>(82)  | Pseudonocardiaceae<br>(52) | unclassified<br>(<50)            |
| OTU1010 | Bacteria<br>(100) | Proteobacteria<br>(100) | Gammaproteobacteria<br>(100) | Vibrionales<br>(96)        | Vibrionaceae<br>(96)       | <i>Allomonas</i><br>(52)         |
| OTU1014 | Bacteria<br>(100) | Proteobacteria<br>(100) | Gammaproteobacteria<br>(100) | Vibrionales<br>(100)       | Vibrionaceae<br>(100)      | <i>Vibrio</i><br>(51)            |
| OTU1015 | Bacteria<br>(100) | Proteobacteria<br>(100) | Gammaproteobacteria<br>(100) | Vibrionales<br>(100)       | Vibrionaceae<br>(100)      | <i>Listonella</i><br>(97)        |
| OTU1017 | Bacteria<br>(100) | Fusobacteria<br>(100)   | Fusobacteriia<br>(100)       | Fusobacteriales<br>(100)   | Fusobacteriaceae<br>(100)  | <i>Fusobacterium</i><br>(100)    |
| OTU1018 | Bacteria<br>(100) | Actinobacteria<br>(100) | Actinobacteria<br>(100)      | Actinomycetales<br>(99)    | unclassified<br>(<50)      | unclassified<br>(<50)            |
| OTU1021 | Bacteria<br>(100) | Actinobacteria<br>(100) | Actinobacteria<br>(100)      | Micrococcales<br>(100)     | Dermabacteraceae<br>(100)  | <i>Brachybacterium</i><br>(100)  |
| OTU1022 | Bacteria<br>(100) | Proteobacteria<br>(100) | Gammaproteobacteria<br>(100) | Pasteurellales<br>(100)    | Pasteurellaceae<br>(100)   |                                  |
| OTU1023 | Bacteria<br>(100) | Proteobacteria<br>(100) | Alphaproteobacteria<br>(100) | Sphingomonadales<br>(93)   | Sphingomonadaceae<br>(93)  | <i>Sphingomonas</i><br>(92)      |
| OTU1024 | Bacteria<br>(100) | Actinobacteria<br>(100) | Actinobacteria<br>(100)      | Pseudonocardiales<br>(99)  | Pseudonocardiaceae<br>(98) | <i>Saccharopolyspora</i><br>(65) |
| OTU1025 | Bacteria<br>(100) | Proteobacteria<br>(100) | Gammaproteobacteria<br>(100) | Vibrionales<br>(96)        | Vibrionaceae<br>(96)       | <i>Allomonas</i><br>(57)         |
| OTU1026 | Bacteria<br>(100) | Proteobacteria<br>(100) | Gammaproteobacteria<br>(100) | Vibrionales<br>(100)       | Vibrionaceae<br>(100)      | <i>Listonella</i><br>(94)        |
| OTU1027 | Bacteria<br>(100) | Proteobacteria<br>(100) | Alphaproteobacteria<br>(100) | Rhodobacterales<br>(95)    | Rhodobacteraceae<br>(95)   | <i>Amaricoccus</i><br>(82)       |
| OTU1028 | Bacteria<br>(100) | Actinobacteria<br>(100) | Actinobacteria<br>(100)      | Pseudonocardiales<br>(100) | Pseudonocardiaceae<br>(95) | unclassified<br>(<50)            |
| OTU1029 | Bacteria<br>(100) | Firmicutes<br>(100)     | Bacilli<br>(100)             | Bacillales<br>(99)         | unclassified<br>(<50)      | unclassified<br>(<50)            |
| OTU1031 | Bacteria<br>(100) | Proteobacteria<br>(100) | Gammaproteobacteria<br>(100) | Pseudomonadales<br>(100)   | Moraxellaceae<br>(100)     | <i>Acinetobacter</i><br>(93)     |
| OTU1032 | Bacteria<br>(100) | Actinobacteria<br>(100) | Actinobacteria<br>(100)      | Pseudonocardiales<br>(100) | Pseudonocardiaceae<br>(75) | unclassified<br>(<50)            |
| OTU1033 | Bacteria<br>(100) | Actinobacteria<br>(100) | Actinobacteria<br>(100)      | Corynebacteriales<br>(100) | Corynebacteriaceae<br>(93) | <i>Corynebacterium</i><br>(85)   |
| OTU1034 | Bacteria<br>(100) | Proteobacteria<br>(100) | Alphaproteobacteria<br>(100) | Sphingomonadales<br>(98)   | Erythrobacteraceae<br>(98) | <i>Erythrobacter</i><br>(98)     |
| OUT1035 | Bacteria<br>(100) | Firmicutes<br>(97)      | Bacilli<br>(96)              | Lactobacillales<br>(95)    | Streptococcaceae<br>(93)   | <i>Streptococcus</i><br>(93)     |
| OUT1036 | Bacteria<br>(100) | Proteobacteria<br>(100) | Gammaproteobacteria<br>(100) | Vibrionales<br>(100)       | Vibrionaceae<br>(100)      | <i>Listonella</i><br>(96)        |

|         |                   |                         |                              |                            |                            |                               |
|---------|-------------------|-------------------------|------------------------------|----------------------------|----------------------------|-------------------------------|
| OUT1037 | Bacteria<br>(100) | Proteobacteria<br>(100) | Gammaproteobacteria<br>(100) | Vibrionales<br>(100)       | Vibrionaceae<br>(100)      | <i>Lucibacterium</i><br>(62)  |
| OUT1038 | Bacteria<br>(100) | Proteobacteria<br>(100) | Betaproteobacteria<br>(100)  | Neisseriales<br>(96)       | Neisseriaceae<br>(96)      |                               |
| OUT1040 | Bacteria<br>(100) | Proteobacteria<br>(100) | Gammaproteobacteria<br>(100) | Aeromonadales<br>(59)      | Aeromonadaceae<br>(59)     | unclassified<br>(<50)         |
| OUT1041 | Bacteria<br>(100) | Actinobacteria<br>(100) | Actinobacteria<br>(100)      | Actinobacteria<br>(100)    | unclassified<br>(<50)      | unclassified<br>(<50)         |
| OUT1043 | Bacteria<br>(100) | Proteobacteria<br>(100) | Gammaproteobacteria<br>(100) | Aeromonadales<br>(84)      | Aeromonadaceae<br>(84)     | <i>Aeromonas</i><br>(84)      |
| OUT1044 | Bacteria<br>(100) | Firmicutes<br>(100)     | Bacilli<br>(100)             | Lactobacillales<br>(94)    | Enterococcaceae<br>(80)    | <i>Enterococcus</i><br>(75)   |
| OUT1045 | Bacteria<br>(100) | Proteobacteria<br>(100) | Gammaproteobacteria<br>(100) | Vibrionales<br>(98)        | Vibrionaceae<br>(98)       | unclassified<br>(<50)         |
| OUT1046 | Bacteria<br>(100) | Firmicutes<br>(100)     | Bacilli<br>(99)              | Bacillales<br>(98)         | Staphylococcaceae<br>(94)  | <i>Staphylococcus</i><br>(89) |
| OUT1047 | Bacteria<br>(99)  | Actinobacteria<br>(99)  | Actinobacteria<br>(99)       | Pseudonocardiales<br>(95)  | Pseudonocardiaceae<br>(70) | unclassified<br>(<50)         |
| OUT1048 | Bacteria<br>(100) | Actinobacteria<br>(100) | Actinobacteria<br>(100)      | Actinomycetales<br>(100)   | Micrococcaceae<br>(100)    | <i>Micrococcus</i><br>(100)   |
| OUT1049 | Bacteria<br>(100) | Proteobacteria<br>(100) | Gammaproteobacteria<br>(100) | Vibrionales<br>(85)        | Vibrionaceae<br>(85)       | unclassified<br>(<50)         |
| OUT1050 | Bacteria<br>(100) | Proteobacteria<br>(100) | Gammaproteobacteria<br>(100) | Vibrionales<br>(100)       | Vibrionaceae<br>(100)      | <i>Listonella</i><br>(87)     |
| OUT1051 | Bacteria<br>(100) | Proteobacteria<br>(100) | Gammaproteobacteria<br>(100) | Pasteurellales<br>(100)    | Pasteurellaceae<br>(100)   | unclassified<br>(<50)         |
| OUT1052 | Bacteria<br>(100) | Proteobacteria<br>(100) | Gammaproteobacteria<br>(100) | Vibrionales<br>(93)        | Vibrionaceae<br>(93)       | unclassified<br>(<50)         |
| OUT1053 | Bacteria<br>(100) | Actinobacteria<br>(100) | Actinobacteria<br>(100)      | Pseudonocardiales<br>(97)  | Pseudonocardiaceae<br>(88) | unclassified<br>(<50)         |
| OUT1054 | Bacteria<br>(100) | Proteobacteria<br>(100) | Betaproteobacteria<br>(100)  | Burkholderiales<br>(100)   | Oxalobacteraceae<br>(100)  | unclassified<br>(<50)         |
| OUT1055 | Bacteria<br>(100) | Firmicutes<br>(100)     | Bacilli<br>(100)             | Lactobacillales<br>(96)    | unclassified<br>(<50)      | unclassified<br>(<50)         |
| OUT1057 | Bacteria<br>(99)  | Firmicutes<br>(98)      | Bacilli<br>(98)              | Lactobacillales<br>(97)    | Streptococcaceae<br>(92)   | <i>Streptococcus</i><br>(92)  |
| OUT1058 | Bacteria<br>(100) | Actinobacteria<br>(100) | Actinobacteria<br>(100)      | Pseudonocardiales<br>(100) | Pseudonocardiaceae<br>(89) | unclassified<br>(<50)         |
| OUT1059 | Bacteria<br>(100) | Proteobacteria<br>(100) | Gammaproteobacteria<br>(100) | Pseudomonadales<br>(96)    | Pseudomonadaceae<br>(96)   | <i>Azotobacter</i><br>(52)    |
| OUT1061 | Bacteria<br>(100) | Firmicutes<br>(100)     | Bacilli<br>(100)             | Lactobacillales<br>(90)    | Enterococcaceae<br>(54)    | unclassified<br>(<50)         |
| OUT1062 | Bacteria<br>(100) | Actinobacteria<br>(100) | Actinobacteria<br>(100)      | Pseudonocardiales<br>(100) | Pseudonocardiaceae<br>(84) | unclassified<br>(<50)         |
| OTU1063 | Bacteria<br>(100) | Proteobacteria<br>(100) | Gammaproteobacteria<br>(100) | Vibrionales<br>(100)       | Vibrionaceae<br>(100)      | <i>Allomonas</i><br>(65)      |
| OTU1064 | Bacteria<br>(100) | Proteobacteria<br>(100) | Gammaproteobacteria<br>(100) | Vibrionales<br>(100)       | Vibrionaceae<br>(100)      | <i>Allomonas</i><br>(62)      |

|         |                   |                         |                              |                            |                             |                                |
|---------|-------------------|-------------------------|------------------------------|----------------------------|-----------------------------|--------------------------------|
| OTU1065 | Bacteria<br>(100) | Proteobacteria<br>(100) | Gammaproteobacteria<br>(100) | Enterobacteriales<br>(100) | Enterobacteriaceae<br>(100) | unclassified<br>(<50)          |
| OTU1066 | Bacteria<br>(100) | Actinobacteria<br>(100) | Actinobacteria<br>(100)      | Pseudonocardiales<br>(100) | Pseudonocardiaceae<br>(95)  | unclassified<br>(<50)          |
| OTU1067 | Bacteria<br>(100) | Actinobacteria<br>(100) | Actinobacteria<br>(100)      | Corynebacteriales<br>(100) | Corynebacteriaceae<br>(94)  | <i>Corynebacterium</i><br>(94) |
| OTU1068 | Bacteria<br>(100) | Actinobacteria<br>(100) | Actinobacteria<br>(100)      | Corynebacteriales<br>(100) | Corynebacteriaceae<br>(62)  | <i>Corynebacterium</i><br>(58) |
| OTU1069 | Bacteria<br>(100) | Proteobacteria<br>(100) | Gammaproteobacteria<br>(100) | Vibrionales<br>(100)       | Vibrionaceae<br>(100)       | <i>Aliivibrio</i><br>(95)      |
| OTU1070 | Bacteria<br>(100) | Proteobacteria<br>(100) | Gammaproteobacteria<br>(100) | Vibrionales<br>(96)        | Vibrionaceae<br>(96)        | unclassified<br>(<50)          |
| OTU1071 | Bacteria<br>(100) | Actinobacteria<br>(100) | Actinobacteria<br>(100)      | Pseudonocardiales<br>(99)  | Pseudonocardiaceae<br>(80)  | unclassified<br>(<50)          |
| OTU1072 | Bacteria<br>(100) | Proteobacteria<br>(100) | Gammaproteobacteria<br>(100) | Vibrionales<br>(100)       | Vibrionaceae<br>(100)       | unclassified<br>(<50)          |
| OTU1073 | Bacteria<br>(100) | Proteobacteria<br>(99)  | Gammaproteobacteria<br>(99)  | Pseudomonadales<br>(97)    | Moraxellaceae<br>(97)       | <i>Acinetobacter</i><br>(92)   |
| OTU1074 | Bacteria<br>(100) | Proteobacteria<br>(100) | Gammaproteobacteria<br>(100) | Vibrionales<br>(100)       | Vibrionaceae<br>(100)       | <i>Lucibacterium</i><br>(69)   |
| OTU1075 | Bacteria<br>(100) | Proteobacteria<br>(100) | Alphaproteobacteria<br>(100) | Rhizobiales<br>(79)        | Phyllobacteriaceae<br>(78)  | <i>Phyllobacterium</i><br>(77) |
| OTU1077 | Bacteria<br>(100) | Actinobacteria<br>(98)  | Actinobacteria<br>(98)       | Pseudonocardiales<br>(92)  | Pseudonocardiaceae<br>(66)  | unclassified<br>(<50)          |
| OTU1078 | Bacteria<br>(100) | Actinobacteria<br>(100) | Actinobacteria<br>(100)      | Pseudonocardiales<br>(100) | Pseudonocardiaceae<br>(85)  | unclassified<br>(<50)          |
| OTU1080 | Bacteria<br>(100) | Actinobacteria<br>(100) | Actinobacteria<br>(100)      | Pseudonocardiales<br>(98)  | Pseudonocardiaceae<br>(79)  | unclassified<br>(<50)          |
| OTU1083 | Bacteria<br>(100) | Actinobacteria<br>(100) | Actinobacteria<br>(100)      | Pseudonocardiales<br>(100) | Pseudonocardiaceae<br>(89)  | unclassified<br>(<50)          |
| OTU1085 | Bacteria<br>(100) | Proteobacteria<br>(100) | Gammaproteobacteria<br>(100) | Vibrionales<br>(99)        | Vibrionaceae<br>(99)        | <i>Enterovibrio</i><br>(68)    |
| OTU1086 | Bacteria<br>(100) | Actinobacteria<br>(100) | Actinobacteria<br>(100)      | Pseudonocardiales<br>(98)  | Pseudonocardiaceae<br>(88)  | unclassified<br>(<50)          |
| OTU1087 | Bacteria<br>(100) | Proteobacteria<br>(100) | Gammaproteobacteria<br>(100) | Vibrionales<br>(82)        | Vibrionaceae<br>(82)        | <i>Allomonas</i><br>(56)       |
| OTU1088 | Bacteria<br>(100) | Proteobacteria<br>(100) | Gammaproteobacteria<br>(100) | Chromatiales<br>(86)       | Chromatiaceae<br>(86)       | unclassified<br>(<50)          |
| OTU1089 | Bacteria<br>(100) | Actinobacteria<br>(99)  | Actinobacteria<br>(99)       | Pseudonocardiales<br>(99)  | unclassified<br>(<50)       | unclassified<br>(<50)          |
| OTU1090 | Bacteria<br>(100) | Proteobacteria<br>(100) | Gammaproteobacteria<br>(100) | Vibrionales<br>(96)        | Vibrionaceae<br>(96)        | unclassified<br>(<50)          |
| OTU1091 | Bacteria<br>(100) | Actinobacteria<br>(100) | Actinobacteria<br>(100)      | Corynebacteriales<br>(100) | Corynebacteriaceae<br>(99)  | <i>Turicella</i><br>(90)       |
| OTU1093 | Bacteria<br>(100) | Actinobacteria<br>(99)  | Actinobacteria<br>(99)       | Pseudonocardiales<br>(98)  | Pseudonocardiaceae<br>(86)  | unclassified<br>(<50)          |
| OTU1095 | Bacteria<br>(100) | Actinobacteria<br>(100) | Actinobacteria<br>(100)      | Pseudonocardiales<br>(100) | Pseudonocardiaceae<br>(89)  | unclassified<br>(<50)          |



|         |                   |                         |                              |                            |                                |                                  |
|---------|-------------------|-------------------------|------------------------------|----------------------------|--------------------------------|----------------------------------|
| OTU1096 | Bacteria<br>(100) | Proteobacteria<br>(100) | Alphaproteobacteria<br>(100) | Rhizobiales<br>(99)        | Phyllobacteriaceae<br>(97)     | <i>Phyllobacterium</i><br>(96)   |
| OTU1097 | Bacteria<br>(100) | Proteobacteria<br>(100) | Alphaproteobacteria<br>(100) | Rhizobiales<br>(56)        | Phyllobacteriaceae<br>(54)     | <i>Phyllobacterium</i><br>(54)   |
| OTU1098 | Bacteria<br>(100) | Actinobacteria<br>(100) | Actinobacteria<br>(100)      | Pseudonocardiales<br>(99)  | Pseudonocardiaceae<br>(88)     | unclassified<br>(<50)            |
| OTU1100 | Bacteria<br>(100) | Proteobacteria<br>(100) | Gammaproteobacteria<br>(100) | Pseudomonadales<br>(97)    | Pseudomonadaceae<br>(97)       | <i>Azotobacter</i><br>(72)       |
| OTU1101 | Bacteria<br>(100) | Proteobacteria<br>(100) | Alphaproteobacteria<br>(100) | unclassified<br>(<50)      | unclassified<br>(<50)          | unclassified<br>(<50)            |
| OTU1102 | Bacteria<br>(100) | Proteobacteria<br>(100) | Alphaproteobacteria<br>(100) | Rhizobiales<br>(100)       | Methylobacteriaceae<br>(100)   | <i>Microvirga</i><br>(100)       |
| OTU1104 | Bacteria<br>(100) | Actinobacteria<br>(100) | Actinobacteria<br>(100)      | Corynebacteriales<br>(99)  | Corynebacteriaceae<br>(90)     | <i>Corynebacterium</i><br>(90)   |
| OTU1105 | Bacteria<br>(100) | Actinobacteria<br>(100) | Actinobacteria<br>(100)      | Pseudonocardiales<br>(99)  | Pseudonocardiaceae<br>(76)     | unclassified<br>(<50)            |
| OTU1106 | Bacteria<br>(100) | Actinobacteria<br>(100) | Actinobacteria<br>(100)      | Pseudonocardiales<br>(100) | Pseudonocardiaceae<br>(74)     | unclassified<br>(<50)            |
| OTU1108 | Bacteria<br>(100) | Proteobacteria<br>(100) | Gammaproteobacteria<br>(100) | Alteromonadales<br>(100)   | Pseudoalteromonadaceae<br>(97) | <i>Pseudoalteromonas</i><br>(96) |
| OTU1112 | Bacteria<br>(100) | Proteobacteria<br>(100) | Gammaproteobacteria<br>(100) | Pseudomonadales<br>(90)    | Pseudomonadaceae<br>(90)       | unclassified<br>(<50)            |
| OTU1113 | Bacteria<br>(100) | Actinobacteria<br>(100) | Actinobacteria<br>(100)      | Pseudonocardiales<br>(100) | Pseudonocardiaceae<br>(78)     | unclassified<br>(<50)            |
| OTU1114 | Bacteria<br>(100) | Proteobacteria<br>(100) | Gammaproteobacteria<br>(100) | Vibrionales<br>(100)       | Vibrionaceae<br>(100)          | <i>Allomonas</i><br>(72)         |
| OTU1115 | Bacteria<br>(100) | Proteobacteria<br>(100) | Alphaproteobacteria<br>(100) | Sphingomonadales<br>(100)  | Sphingomonadaceae<br>(100)     | <i>Sphingomonas</i><br>(100)     |
| OTU1118 | Bacteria<br>(100) | Proteobacteria<br>(100) | Alphaproteobacteria<br>(100) | Rhodobacterales<br>(100)   | Rhodobacteraceae<br>(100)      | <i>Paracoccus</i><br>(91)        |
| OTU1119 | Bacteria<br>(100) | Actinobacteria<br>(100) | Actinobacteria<br>(100)      | Corynebacteriales<br>(100) | Corynebacteriaceae<br>(97)     | <i>Corynebacterium</i><br>(94)   |
| OTU1120 | Bacteria<br>(100) | Proteobacteria<br>(100) | Gammaproteobacteria<br>(100) | Vibrionales<br>(100)       | Vibrionaceae<br>(100)          | <i>Allomonas</i><br>(71)         |
| OTU1121 | Bacteria<br>(100) | Firmicutes<br>(100)     | Bacilli<br>(100)             | Lactobacillales<br>(100)   | Streptococcaceae<br>(100)      | <i>Lactococcus</i><br>(100)      |
| OTU1123 | Bacteria<br>(100) | Proteobacteria<br>(100) | Gammaproteobacteria<br>(100) | Aeromonadales<br>(100)     | Aeromonadaceae<br>(100)        | <i>Aeromonas</i><br>(100)        |
| OTU1124 | Bacteria<br>(100) | Proteobacteria<br>(100) | Gammaproteobacteria<br>(100) | Vibrionales<br>(100)       | Vibrionaceae<br>(100)          | <i>Allomonas</i><br>(67)         |
| OTU1125 | Bacteria<br>(100) | Actinobacteria<br>(99)  | Actinobacteria<br>(99)       | Pseudonocardiales<br>(99)  | Pseudonocardiaceae<br>(94)     | unclassified<br>(<50)            |
| OTU1126 | Bacteria<br>(100) | Actinobacteria<br>(100) | Actinobacteria<br>(100)      | Pseudonocardiales<br>(100) | Pseudonocardiaceae<br>(69)     | unclassified<br>(<50)            |
| OTU1127 | Bacteria<br>(100) | Proteobacteria<br>(100) | Gammaproteobacteria<br>(100) | Vibrionales<br>(100)       | Vibrionaceae<br>(100)          | <i>Listonella</i><br>(93)        |
| OTU1128 | Bacteria<br>(100) | Proteobacteria<br>(100) | Gammaproteobacteria<br>(100) | unclassified<br>(<50)      | unclassified<br>(<50)          | unclassified<br>(<50)            |

|         |                   |                         |                                |                            |                            |                                |
|---------|-------------------|-------------------------|--------------------------------|----------------------------|----------------------------|--------------------------------|
| OTU1129 | Bacteria<br>(100) | Proteobacteria<br>(100) | Gammaproteobacteria<br>(100)   | Pseudomonadales<br>(59)    | Moraxellaceae<br>(59)      | <i>Acinetobacter</i><br>(55)   |
| OTU1130 | Bacteria<br>(100) | Proteobacteria<br>(100) | Gammaproteobacteria<br>(100)   | Vibrionales<br>(100)       | Vibrionaceae<br>(100)      | <i>Allomonas</i><br>(50)       |
| OTU1131 | Bacteria<br>(100) | Proteobacteria<br>(100) | Gammaproteobacteria<br>(100)   | Enterobacteriales<br>(66)  | Enterobacteriaceae<br>(66) | unclassified<br>(<50)          |
| OTU1132 | Bacteria<br>(100) | Actinobacteria<br>(97)  | Actinobacteria<br>(97)         | Acidimicrobiales<br>(85)   | unclassified<br>(<50)      | unclassified<br>(<50)          |
| OTU1133 | Bacteria<br>(100) | Proteobacteria<br>(100) | Gammaproteobacteria<br>(100)   | Vibrionales<br>(99)        | Vibrionaceae<br>(99)       | <i>Allomonas</i><br>(84)       |
| OTU1134 | Bacteria<br>(100) | Actinobacteria<br>(100) | Actinobacteria<br>(100)        | Corynebacteriales<br>(100) | Corynebacteriaceae<br>(60) | <i>Corynebacterium</i><br>(61) |
| OTU1135 | Bacteria<br>(100) | Proteobacteria<br>(100) | Gammaproteobacteria<br>(100)   | Enterobacteriales<br>(90)  | Enterobacteriaceae<br>(90) | unclassified<br>(<50)          |
| OTU1136 | Bacteria<br>(100) | Proteobacteria<br>(99)  | Gammaproteobacteria<br>(99)    | Vibrionales<br>(95)        | Vibrionaceae<br>(95)       | unclassified<br>(<50)          |
| OTU1137 | Bacteria<br>(100) | Proteobacteria<br>(100) | Gammaproteobacteria<br>(100)   | Vibrionales<br>(100)       | Vibrionaceae<br>(100)      | <i>Allomonas</i><br>(76)       |
| OTU1138 | Bacteria<br>(100) | Proteobacteria<br>(100) | Gammaproteobacteria<br>(100)   | Vibrionales<br>(100)       | Vibrionaceae<br>(100)      | <i>Listonella</i><br>(75)      |
| OTU1139 | Bacteria<br>(100) | Proteobacteria<br>(100) | Gammaproteobacteria<br>(100)   | Pseudomonadales<br>(99)    | Moraxellaceae<br>(99)      | <i>Acinetobacter</i><br>(93)   |
| OTU1140 | Bacteria<br>(100) | Proteobacteria<br>(100) | Gammaproteobacteria<br>(100)   | Pseudomonadales<br>(100)   | Moraxellaceae<br>(100)     | <i>Acinetobacter</i><br>(93)   |
| OTU1141 | Bacteria<br>(100) | Firmicutes<br>(100)     | Bacilli<br>(100)               | Lactobacillales<br>(100)   | Streptococcaceae<br>(98)   | <i>Streptococcus</i><br>(97)   |
| OTU1142 | Bacteria<br>(100) | Bacteroidetes<br>(100)  | Bacteroidia<br>(97)            | Bacteroidales<br>(97)      | unclassified<br>(<50)      | unclassified<br>(<50)          |
| OTU1143 | Bacteria<br>(100) | Actinobacteria<br>(100) | Actinobacteria<br>(100)        | Pseudonocardiales<br>(100) | Pseudonocardiaceae<br>(80) | unclassified<br>(<50)          |
| OTU1144 | Bacteria<br>(100) | Proteobacteria<br>(100) | Alphaproteobacteria<br>(100)   | Rhodobacterales<br>(97)    | Rhodobacteraceae<br>(97)   | <i>Amaricoccus</i><br>(90)     |
| OTU1145 | Bacteria<br>(100) | Proteobacteria<br>(100) | Gammaproteobacteria<br>(100)   | Vibrionales<br>(100)       | Vibrionaceae<br>(100)      | unclassified<br>(<50)          |
| OTU1146 | Bacteria<br>(100) | Proteobacteria<br>(100) | Gammaproteobacteria<br>(100)   | Vibrionales<br>(80)        | Vibrionaceae<br>(80)       | <i>Photobacterium</i><br>(61)  |
| OTU1147 | Bacteria<br>(100) | Proteobacteria<br>(100) | Gammaproteobacteria<br>(100)   | Vibrionales<br>(100)       | Vibrionaceae<br>(100)      | <i>Allomonas</i><br>(80)       |
| OTU1148 | Bacteria<br>(100) | Proteobacteria<br>(100) | Gammaproteobacteria<br>(100)   | Vibrionales<br>(95)        | Vibrionaceae<br>(95)       | <i>Photobacterium</i><br>(86)  |
| OTU1149 | Bacteria<br>(100) | Proteobacteria<br>(100) | Gammaproteobacteria<br>(100)   | Vibrionales<br>(100)       | Vibrionaceae<br>(100)      | <i>Listonella</i><br>(88)      |
| OTU1150 | Bacteria<br>(100) | Proteobacteria<br>(100) | Epsilonproteobacteria<br>(100) | Campylobacterales<br>(100) | Helicobacteraceae<br>(100) | <i>Sulfurovum</i><br>(100)     |
| OTU1151 | Bacteria<br>(100) | Proteobacteria<br>(100) | Gammaproteobacteria<br>(100)   | Vibrionales<br>(100)       | Vibrionaceae<br>(100)      | <i>Allomonas</i><br>(83)       |
| OTU1152 | Bacteria<br>(100) | Proteobacteria<br>(100) | Gammaproteobacteria<br>(100)   | Pseudomonadales<br>(100)   | Moraxellaceae<br>(100)     | <i>Acinetobacter</i><br>(99)   |

|         |                   |                         |                              |                            |                                          |                               |
|---------|-------------------|-------------------------|------------------------------|----------------------------|------------------------------------------|-------------------------------|
| OTU1153 | Bacteria<br>(100) | Bacteroidetes<br>(100)  | Cytophagia<br>(98)           | Cytophagales<br>(98)       | Flammeovirgaceae<br>(94)                 | <i>Marinoscillum</i><br>(57)  |
| OTU1154 | Bacteria<br>(100) | Firmicutes<br>(100)     | Bacilli<br>(98)              | Bacillales<br>(97)         | Staphylococcaceae<br>(88)                | <i>Staphylococcus</i><br>(76) |
| OTU1155 | Bacteria<br>(100) | Firmicutes<br>(100)     | Bacilli<br>(100)             | Bacillales<br>(100)        | Planococcaceae<br>(99)                   | <i>Sporosarcina</i><br>(99)   |
| OTU1156 | Bacteria<br>(100) | Proteobacteria<br>(100) | Gammaproteobacteria<br>(100) | Vibrionales<br>(100)       | Vibrionaceae<br>(100)                    | <i>Listonella</i><br>(90)     |
| OTU1157 | Bacteria<br>(100) | Proteobacteria<br>(100) | Gammaproteobacteria<br>(100) | Vibrionales<br>(100)       | Vibrionaceae<br>(100)                    | <i>Listonella</i><br>(85)     |
| OTU1158 | Bacteria<br>(100) | Proteobacteria<br>(99)  | Gammaproteobacteria<br>(97)  | Pseudomonadales<br>(67)    | Moraxellaceae<br>(50)                    | unclassified<br>(<50)         |
| OTU1159 | Bacteria<br>(100) | Proteobacteria<br>(100) | Gammaproteobacteria<br>(100) | Vibrionales<br>(100)       | Vibrionaceae<br>(100)                    | <i>Allomonas</i><br>(78)      |
| OTU1160 | Bacteria<br>(100) | Proteobacteria<br>(100) | Gammaproteobacteria<br>(100) | Vibrionales<br>(100)       | Vibrionaceae<br>(100)                    | <i>Allomonas</i><br>(73)      |
| OTU1161 | Bacteria<br>(100) | Actinobacteria<br>(100) | Actinobacteria<br>(100)      | Pseudonocardiales<br>(100) | Pseudonocardiaceae<br>(65)               | unclassified<br>(<50)         |
| OTU1162 | Bacteria<br>(100) | Proteobacteria<br>(100) | Gammaproteobacteria<br>(100) | Enterobacteriales<br>(99)  | Enterobacteriaceae<br>(99)               | unclassified<br>(<50)         |
| OTU1163 | Bacteria<br>(100) | Proteobacteria<br>(100) | Alphaproteobacteria<br>(100) | Rhizobiales<br>(57)        | unclassified<br>(<50)                    | unclassified<br>(<50)         |
| OTU1164 | Bacteria<br>(100) | Proteobacteria<br>(100) | Gammaproteobacteria<br>(100) | Vibrionales<br>(100)       | Vibrionaceae<br>(100)                    | <i>Allomonas</i><br>(83)      |
| OTU1165 | Bacteria<br>(100) | Proteobacteria<br>(100) | Gammaproteobacteria<br>(100) | Vibrionales<br>(94)        | Vibrionaceae<br>(94)                     | unclassified<br>(<50)         |
| OTU1166 | Bacteria<br>(100) | Actinobacteria<br>(100) | Actinobacteria<br>(100)      | Pseudonocardiales<br>(100) | Pseudonocardiaceae<br>(97)               | unclassified<br>(<50)         |
| OTU1167 | Bacteria<br>(100) | Proteobacteria<br>(100) | Gammaproteobacteria<br>(94)  | Chromatiales<br>(89)       | Chromatiaceae<br>(88)                    | <i>Halochromatium</i><br>(75) |
| OTU1168 | Bacteria<br>(100) | Proteobacteria<br>(100) | Alphaproteobacteria<br>(100) | Rhodobacterales<br>(94)    | Rhodobacteraceae<br>(94)                 | unclassified<br>(<50)         |
| OTU1169 | Bacteria<br>(100) | Actinobacteria<br>(100) | Actinobacteria<br>(100)      | Pseudonocardiales<br>(100) | unclassified<br>(<50)                    | unclassified<br>(<50)         |
| OTU1170 | Bacteria<br>(100) | Proteobacteria<br>(100) | Gammaproteobacteria<br>(100) | Vibrionales<br>(99)        | Vibrionaceae<br>(99)                     | unclassified<br>(<50)         |
| OTU1171 | Bacteria<br>(100) | Proteobacteria<br>(100) | Gammaproteobacteria<br>(100) | Vibrionales<br>(100)       | Vibrionaceae<br>(100)                    | <i>Vibrio</i><br>(50)         |
| OTU1172 | Bacteria<br>(100) | Firmicutes<br>(100)     | Clostridia<br>(100)          | Clostridiales<br>(100)     | Clostridiales_Incertae Sedis<br>XI (100) | <i>Peptoniphilus</i><br>(100) |
| OTU1173 | Bacteria<br>(100) | Proteobacteria<br>(100) | Gammaproteobacteria<br>(100) | Vibrionales<br>(100)       | Vibrionaceae<br>(100)                    | <i>Listonella</i><br>(74)     |
| OTU1174 | Bacteria<br>(100) | Proteobacteria<br>(100) | Gammaproteobacteria<br>(100) | Vibrionales<br>(89)        | Vibrionaceae<br>(89)                     | unclassified<br>(<50)         |
| OUT1175 | Bacteria<br>(100) | Proteobacteria<br>(100) | Gammaproteobacteria<br>(100) | Enterobacteriales<br>(100) | Enterobacteriaceae<br>(100)              | unclassified<br>(<50)         |
| OUT1176 | Bacteria<br>(100) | Actinobacteria<br>(100) | Actinobacteria<br>(100)      | Pseudonocardiales<br>(99)  | Pseudonocardiaceae<br>(92)               | unclassified<br>(<50)         |

|         |                   |                                   |                              |                            |                                        |                                  |
|---------|-------------------|-----------------------------------|------------------------------|----------------------------|----------------------------------------|----------------------------------|
| OTU1177 | Bacteria<br>(100) | Firmicutes<br>(100)               | Bacilli<br>(99)              | Bacillales<br>(94)         | Staphylococcaceae<br>(84)              | <i>Staphylococcus</i><br>(73)    |
| OTU1178 | Bacteria<br>(100) | Proteobacteria<br>(100)           | Alphaproteobacteria<br>(100) | Rhodobacterales<br>(99)    | Rhodobacteraceae<br>(99)               | unclassified<br>(<50)            |
| OTU1179 | Bacteria<br>(94)  | Bacteroidetes<br>(85)             | Bacteroidia<br>(68)          | Bacteroidales<br>(68)      | Prevotellaceae<br>(63)                 | unclassified<br>(<50)            |
| OTU1180 | Bacteria<br>(100) | Firmicutes<br>(100)               | Bacilli<br>(100)             | Bacillales<br>(100)        | Bacillales_Incertae Sedis XII<br>(100) | <i>Exiguobacterium</i><br>(100)  |
| OTU1181 | Bacteria<br>(100) | Actinobacteria<br>(100)           | Actinobacteria<br>(100)      | Pseudonocardiales<br>(99)  | Pseudonocardiaceae<br>(77)             | unclassified<br>(<50)            |
| OTU1182 | Bacteria<br>(100) | Actinobacteria<br>(97)            | Actinobacteria<br>(97)       | Pseudonocardiales<br>(94)  | Pseudonocardiaceae<br>(69)             | unclassified<br>(<50)            |
| OTU1183 | Bacteria<br>(100) | Actinobacteria<br>(100)           | Actinobacteria<br>(100)      | Pseudonocardiales<br>(100) | Pseudonocardiaceae<br>(79)             | unclassified<br>(<50)            |
| OTU1184 | Bacteria<br>(100) | Bacteroidetes<br>(85)             | unclassified<br>(<50)        | unclassified<br>(<50)      | unclassified<br>(<50)                  | unclassified<br>(<50)            |
| OTU1185 | Bacteria<br>(100) | Actinobacteria<br>(98)            | Actinobacteria<br>(98)       | Pseudonocardiales<br>(98)  | Pseudonocardiaceae<br>(62)             | unclassified<br>(<50)            |
| OTU1186 | Bacteria<br>(100) | Cyanobacteria/<br>Chloroplast(78) | unclassified<br>(<50)        | unclassified<br>(<50)      | unclassified<br>(<50)                  | unclassified<br>(<50)            |
| OTU1187 | Bacteria<br>(100) | Proteobacteria<br>(100)           | Gammaproteobacteria<br>(100) | Alteromonadales<br>(100)   | Pseudoalteromonadaceae<br>(96)         | <i>Pseudoalteromonas</i><br>(95) |
| OTU1188 | Bacteria<br>(100) | Proteobacteria<br>(100)           | Gammaproteobacteria<br>(100) | Vibrionales<br>(98)        | Vibrionaceae<br>(98)                   | <i>Allomonas</i><br>(67)         |
| OTU1189 | Bacteria<br>(100) | Actinobacteria<br>(100)           | Actinobacteria<br>(100)      | Pseudonocardiales<br>(100) | Pseudonocardiaceae<br>(75)             | unclassified<br>(<50)            |
| OTU1190 | Bacteria<br>(100) | Actinobacteria<br>(100)           | Actinobacteria<br>(100)      | Pseudonocardiales<br>(99)  | Pseudonocardiaceae<br>(69)             | unclassified<br>(<50)            |
| OTU1191 | Bacteria<br>(100) | Actinobacteria<br>(98)            | Actinobacteria<br>(98)       | Pseudonocardiales<br>(96)  | Pseudonocardiaceae<br>(70)             | unclassified<br>(<50)            |
| OTU1192 | Bacteria<br>(100) | Proteobacteria<br>(100)           | Alphaproteobacteria<br>(100) | Rhodobacterales<br>(89)    | Rhodobacteraceae<br>(89)               | <i>Roseicyclus</i><br>(52)       |
| OTU1193 | Bacteria<br>(100) | Proteobacteria<br>(100)           | Gammaproteobacteria<br>(100) | Vibrionales<br>(100)       | Vibrionaceae<br>(100)                  | <i>Allomonas</i><br>(73)         |
| OTU1194 | Bacteria<br>(100) | Proteobacteria<br>(100)           | Gammaproteobacteria<br>(99)  | Alteromonadales<br>(68)    | unclassified<br>(<50)                  | unclassified<br>(<50)            |
| OTU1195 | Bacteria<br>(100) | Proteobacteria<br>(100)           | Gammaproteobacteria<br>(100) | Vibrionales<br>(100)       | Vibrionaceae<br>(100)                  | <i>Listonella</i><br>(81)        |
| OTU1196 | Bacteria<br>(100) | Proteobacteria<br>(100)           | Gammaproteobacteria<br>(100) | Vibrionales<br>(68)        | Vibrionaceae<br>(68)                   | unclassified<br>(<50)            |
| OTU1197 | Bacteria<br>(100) | Proteobacteria<br>(100)           | Gammaproteobacteria<br>(100) | Pseudomonadales<br>(100)   | Moraxellaceae<br>(100)                 | <i>Acinetobacter</i><br>(97)     |
| OTU1198 | Bacteria<br>(100) | Actinobacteria<br>(100)           | Actinobacteria<br>(100)      | Pseudonocardiales<br>(100) | Pseudonocardiaceae<br>(90)             | unclassified<br>(<50)            |
| OTU1199 | Bacteria<br>(100) | Proteobacteria<br>(100)           | Gammaproteobacteria<br>(100) | Vibrionales<br>(99)        | Vibrionaceae<br>(99)                   | <i>Allomonas</i><br>(76)         |
| OTU1200 | Bacteria<br>(100) | Proteobacteria<br>(99)            | Gammaproteobacteria<br>(99)  | Vibrionales<br>(90)        | Vibrionaceae<br>(90)                   | <i>Allomonas</i><br>(51)         |

|         |                   |                         |                              |                            |                             |                            |
|---------|-------------------|-------------------------|------------------------------|----------------------------|-----------------------------|----------------------------|
| OTU1201 | Bacteria<br>(100) | Proteobacteria<br>(100) | Gammaproteobacteria<br>(100) | Vibrionales<br>(100)       | Vibrionaceae<br>(100)       | unclassified<br>(<50)      |
| OTU1202 | Bacteria<br>(100) | Proteobacteria<br>(100) | Gammaproteobacteria<br>(100) | Vibrionales<br>(100)       | Vibrionaceae<br>(100)       | <i>Allomonas</i><br>(71)   |
| OTU1203 | Bacteria<br>(100) | Actinobacteria<br>(97)  | Actinobacteria<br>(97)       | Pseudonocardiales<br>(97)  | Pseudonocardiaceae<br>(87)  | unclassified<br>(<50)      |
| OTU1204 | Bacteria<br>(100) | Actinobacteria<br>(100) | Actinobacteria<br>(100)      | Pseudonocardiales<br>(100) | Pseudonocardiaceae<br>(80)  | unclassified<br>(<50)      |
| OTU1205 | Bacteria<br>(100) | Actinobacteria<br>(100) | Actinobacteria<br>(100)      | Pseudonocardiales<br>(100) | Pseudonocardiaceae<br>(100) | unclassified<br>(<50)      |
| OTU1206 | Bacteria<br>(100) | Actinobacteria<br>(100) | Actinobacteria<br>(100)      | Pseudonocardiales<br>(100) | Pseudonocardiaceae<br>(62)  | unclassified<br>(<50)      |
| OTU1207 | Bacteria<br>(100) | Actinobacteria<br>(100) | Actinobacteria<br>(100)      | Pseudonocardiales<br>(100) | Pseudonocardiaceae<br>(89)  | unclassified<br>(<50)      |
| OTU1208 | Bacteria<br>(100) | Proteobacteria<br>(100) | Gammaproteobacteria<br>(100) | Aeromonadales<br>(66)      | Aeromonadaceae<br>(66)      | <i>Aeromonas</i><br>(54)   |
| OTU1209 | Bacteria<br>(100) | Actinobacteria<br>(96)  | Actinobacteria<br>(96)       | Acidimicrobiales<br>(51)   | unclassified<br>(<50)       | unclassified<br>(<50)      |
| OTU1210 | Bacteria<br>(100) | Proteobacteria<br>(100) | Gammaproteobacteria<br>(100) | Pseudomonadales<br>(77)    | Pseudomonadaceae<br>(77)    | <i>Serpens</i><br>(63)     |
| OTU1211 | Bacteria<br>(100) | Proteobacteria<br>(100) | Gammaproteobacteria<br>(100) | Pseudomonadales<br>(83)    | Pseudomonadaceae<br>(83)    | unclassified<br>(<50)      |
| OTU1212 | Bacteria<br>(100) | Actinobacteria<br>(98)  | Actinobacteria<br>(98)       | Pseudonocardiales<br>(98)  | Pseudonocardiaceae<br>(75)  | unclassified<br>(<50)      |
| OTU1213 | Bacteria<br>(100) | Proteobacteria<br>(84)  | Alphaproteobacteria<br>(69)  | unclassified<br>(<50)      | unclassified<br>(<50)       | unclassified<br>(<50)      |
| OTU1214 | Bacteria<br>(100) | Actinobacteria<br>(98)  | Actinobacteria<br>(98)       | Pseudonocardiales<br>(97)  | Pseudonocardiaceae<br>(70)  | unclassified<br>(<50)      |
| OTU1215 | Bacteria<br>(100) | Proteobacteria<br>(100) | Gammaproteobacteria<br>(100) | Vibrionales<br>(100)       | Vibrionaceae<br>(100)       | <i>Allomonas</i><br>(54)   |
| OTU1216 | Bacteria          | Actinobacteria<br>(96)  | Actinobacteria<br>(96)       | Pseudonocardiales<br>(95)  | Pseudonocardiaceae<br>(76)  | unclassified<br>(<50)      |
| OTU1217 | Bacteria<br>(100) | Proteobacteria<br>(100) | Gammaproteobacteria<br>(100) | Vibrionales<br>(97)        | Vibrionaceae<br>(97)        | unclassified<br>(<50)      |
| OTU1218 | Bacteria<br>(100) | Proteobacteria<br>(100) | Gammaproteobacteria<br>(99)  | Vibrionales<br>(74)        | Vibrionaceae<br>(74)        | unclassified<br>(<50)      |
| OTU1219 | Bacteria<br>(100) | Proteobacteria<br>(100) | Gammaproteobacteria<br>(100) | Vibrionales<br>(70)        | Vibrionaceae<br>(70)        | unclassified<br>(<50)      |
| OTU1220 | Bacteria<br>(100) | Proteobacteria<br>(100) | Gammaproteobacteria<br>(100) | Pseudomonadales<br>(100)   | Pseudomonadaceae<br>(100)   | <i>Pseudomonas</i><br>(95) |
| OTU1221 | Bacteria<br>(100) | Actinobacteria<br>(100) | Actinobacteria<br>(100)      | Pseudonocardiales<br>(100) | Pseudonocardiaceae<br>(97)  | unclassified<br>(<50)      |
| OTU1222 | Bacteria          | Planctomycetes<br>(69)  | Planctomycetia<br>(69)       | Planctomycetales<br>(69)   | Planctomycetaceae<br>(69)   | unclassified<br>(<50)      |
| OTU1223 | Bacteria<br>(100) | Proteobacteria          | Gammaproteobacteria<br>(100) | Enterobacteriales<br>(87)  | Enterobacteriaceae          | unclassified<br>(<50)      |
| OTU1224 | Bacteria<br>(100) | Bacteroidetes<br>(100)  | Bacteroidia<br>(100)         | Bacteroidales<br>(100)     | Prevotellaceae<br>(100)     | <i>Prevotella</i><br>(100) |

|         |                   |                         |                              |                            |                                |                                  |
|---------|-------------------|-------------------------|------------------------------|----------------------------|--------------------------------|----------------------------------|
| OTU1225 | Bacteria<br>(100) | Actinobacteria<br>(100) | Actinobacteria<br>(100)      | Micrococcales<br>(100)     | Micrococcaceae<br>(99)         | <i>Nesterenkonia</i><br>(75)     |
| OTU1226 | Bacteria<br>(100) | Proteobacteria<br>(100) | Alphaproteobacteria<br>(100) | Rhodobacterales<br>(91)    | Rhodobacteraceae<br>(91)       | <i>Roseicyclus</i><br>(50)       |
| OTU1227 | Bacteria<br>(100) | Proteobacteria<br>(100) | Alphaproteobacteria<br>(100) | Rhodobacterales<br>(95)    | Rhodobacteraceae<br>(95)       | unclassified<br>( $<50$ )        |
| OTU1228 | Bacteria<br>(100) | Actinobacteria<br>(100) | Actinobacteria<br>(100)      | Pseudonocardiales<br>(100) | Pseudonocardiaceae<br>(90)     | unclassified<br>( $<50$ )        |
| OTU1229 | Bacteria<br>(100) | Proteobacteria<br>(100) | Gammaproteobacteria<br>(100) | Alteromonadales<br>(78)    | Pseudoalteromonadaceae<br>(70) | <i>Pseudoalteromonas</i><br>(70) |
| OTU1230 | Bacteria<br>(100) | Chloroflexi<br>(76)     | Caldilineae<br>(75)          | Caldilineales<br>(75)      | Caldilineaceae<br>(75)         | <i>Litorilinea</i><br>(66)       |
| OTU1231 | Bacteria<br>(100) | Proteobacteria<br>(100) | Gammaproteobacteria<br>(100) | Pseudomonadales<br>(92)    | Pseudomonadaceae<br>(92)       | unclassified<br>( $<50$ )        |
| OTU1232 | Bacteria<br>(100) | Proteobacteria<br>(100) | Gammaproteobacteria<br>(100) | Vibrionales<br>(100)       | Vibrionaceae<br>(100)          | <i>Allomonas</i><br>(88)         |
| OTU1233 | Bacteria<br>(100) | Proteobacteria<br>(100) | Gammaproteobacteria<br>(100) | Vibrionales<br>(93)        | Vibrionaceae<br>(93)           | unclassified<br>( $<50$ )        |
| OTU1234 | Bacteria<br>(100) | Actinobacteria<br>(100) | Actinobacteria<br>(100)      | Pseudonocardiales<br>(100) | Pseudonocardiaceae<br>(75)     | unclassified<br>( $<50$ )        |
| OTU1235 | Bacteria<br>(100) | Firmicutes<br>(100)     | Bacilli<br>(93)              | unclassified<br>( $<50$ )  | unclassified<br>( $<50$ )      | unclassified<br>( $<50$ )        |
| OTU1236 | Bacteria<br>(100) | Proteobacteria<br>(100) | Gammaproteobacteria<br>(95)  | Vibrionales<br>(92)        | Vibrionaceae<br>(92)           | <i>Allomonas</i><br>(83)         |
| OTU1237 | Bacteria<br>(100) | Proteobacteria<br>(100) | Gammaproteobacteria<br>(100) | Pseudomonadales<br>(93)    | Pseudomonadaceae<br>(93)       | unclassified<br>( $<50$ )        |
| OTU1238 | Bacteria<br>(100) | Proteobacteria<br>(100) | Gammaproteobacteria<br>(100) | Enterobacteriales<br>(98)  | Enterobacteriaceae<br>(98)     | unclassified<br>( $<50$ )        |
| OTU1239 | Bacteria<br>(100) | Firmicutes<br>(99)      | Clostridia<br>(99)           | Clostridiales<br>(99)      | Lachnospiraceae<br>(80)        | <i>Cellulosilyticum</i><br>(78)  |
| OUT1240 | Bacteria<br>(100) | Proteobacteria<br>(100) | Gammaproteobacteria<br>(100) | Aeromonadales<br>(69)      | Aeromonadaceae<br>(69)         | <i>Allomonas</i><br>(66)         |
| OUT1241 | Bacteria<br>(100) | Actinobacteria<br>(100) | Actinobacteria<br>(100)      | Micrococcales<br>(100)     | Micrococcaceae<br>(93)         | <i>Rothia</i><br>(90)            |
| OUT1242 | Bacteria<br>(100) | Proteobacteria<br>(100) | Gammaproteobacteria<br>(100) | Vibrionales<br>(100)       | Vibrionaceae<br>(100)          | <i>Listonella</i><br>(76)        |
| OUT1243 | Bacteria<br>(100) | Proteobacteria<br>(100) | Gammaproteobacteria<br>(100) | Enterobacteriales<br>(95)  | Enterobacteriaceae<br>(95)     | unclassified<br>( $<50$ )        |
| OUT1244 | Bacteria<br>(100) | Proteobacteria<br>(100) | Alphaproteobacteria<br>(100) | Rhodobacterales<br>(99)    | Rhodobacteraceae<br>(99)       | unclassified<br>( $<50$ )        |
| OUT1245 | Bacteria<br>(100) | Firmicutes<br>(100)     | Bacilli<br>(100)             | Bacillales<br>(100)        | Listeriaceae<br>(95)           | <i>Brochothrix</i><br>(95)       |
| OUT1246 | Bacteria<br>(100) | Proteobacteria<br>(100) | Gammaproteobacteria<br>(100) | Vibrionales<br>(100)       | Vibrionaceae<br>(100)          | <i>Listonella</i><br>(74)        |
| OUT1247 | Bacteria<br>(100) | Planctomycets<br>(100)  | Planctomycetia<br>(100)      | Planctomycetales<br>(100)  | Planctomycetaceae<br>(100)     | <i>Pirellula</i><br>(70)         |
| OUT1248 | Bacteria<br>(100) | Proteobacteria<br>(100) | Gammaproteobacteria<br>(100) | Vibrionales<br>(88)        | Vibrionaceae<br>(88)           | unclassified<br>( $<50$ )        |

|         |                   |                         |                              |                            |                                |                                  |
|---------|-------------------|-------------------------|------------------------------|----------------------------|--------------------------------|----------------------------------|
| OTU1249 | Bacteria<br>(100) | Proteobacteria<br>(100) | Gammaproteobacteria<br>(100) | Alteromonadales<br>(100)   | Pseudoalteromonadaceae<br>(97) | <i>Pseudoalteromonas</i><br>(88) |
| OTU1250 | Bacteria<br>(100) | Actinobacteria<br>(100) | Actinobacteria<br>(100)      | Pseudonocardiales<br>(98)  | Pseudonocardiaceae<br>(72)     | unclassified<br>(<50)            |
| OTU1251 | Bacteria<br>(100) | Actinobacteria<br>(100) | Actinobacteria<br>(100)      | Pseudonocardiales<br>(100) | Pseudonocardiaceae<br>(82)     | unclassified<br>(<50)            |
| OTU1252 | Bacteria<br>(100) | Actinobacteria<br>(100) | Actinobacteria<br>(100)      | Pseudonocardiales<br>(100) | Pseudonocardiaceae<br>(100)    | unclassified<br>(<50)            |
| OTU1253 | Bacteria<br>(100) | Proteobacteria<br>(100) | Alphaproteobacteria<br>(100) | Rhodospirillales<br>(99)   | Rhodospirillaceae<br>(97)      | <i>Azospirillum</i><br>(95)      |
| OTU1254 | Bacteria<br>(100) | Actinobacteria<br>(100) | Actinobacteria<br>(100)      | Pseudonocardiales<br>(100) | Pseudonocardiaceae<br>(85)     | unclassified<br>(<50)            |
| OTU1255 | Bacteria<br>(100) | unclassified<br>(<50)   | unclassified<br>(<50)        | unclassified<br>(<50)      | unclassified<br>(<50)          | unclassified<br>(<50)            |
| OTU1256 | Bacteria<br>(100) | Proteobacteria<br>(100) | Gammaproteobacteria<br>(100) | Vibrionales<br>(98)        | Vibrionaceae<br>(98)           | <i>Salinivibrio</i><br>(54)      |
| OTU1257 | Bacteria<br>(100) | Proteobacteria<br>(100) | Gammaproteobacteria<br>(100) | Aeromonadales<br>(72)      | Aeromonadaceae<br>(72)         | <i>Aeromonas</i><br>(54)         |
| OTU1258 | Bacteria<br>(100) | Proteobacteria<br>(99)  | Gammaproteobacteria<br>(98)  | Pseudomonadales<br>(93)    | Pseudomonadaceae<br>(93)       | <i>Azomonas</i><br>(62)          |
| OTU1259 | Bacteria<br>(100) | Proteobacteria<br>(100) | Gammaproteobacteria<br>(100) | Vibrionales<br>(99)        | Vibrionaceae<br>(99)           | <i>Allomonas</i><br>(61)         |
| OTU1260 | Bacteria<br>(100) | Actinobacteria<br>(100) | Actinobacteria<br>(100)      | Pseudonocardiales<br>(99)  | Pseudonocardiaceae<br>(88)     | unclassified<br>(<50)            |
| OTU1261 | Bacteria<br>(100) | Proteobacteria<br>(100) | Gammaproteobacteria<br>(100) | Vibrionales<br>(100)       | Vibrionaceae<br>(100)          | unclassified<br>(<50)            |
| OTU1262 | Bacteria<br>(100) | Proteobacteria<br>(100) | Gammaproteobacteria<br>(100) | Vibrionales<br>(100)       | Vibrionaceae<br>(100)          | <i>Allomonas</i><br>(65)         |
| OTU1263 | Bacteria<br>(100) | Proteobacteria<br>(100) | Alphaproteobacteria<br>(100) | Rhodobacterales<br>(96)    | Rhodobacteraceae<br>(96)       | <i>Thalassobius</i><br>(58)      |
| OTU1264 | Bacteria<br>(100) | Actinobacteria<br>(100) | Actinobacteria<br>(100)      | Pseudonocardiales<br>(97)  | Pseudonocardiaceae<br>(88)     | unclassified<br>(<50)            |
| OTU1265 | Bacteria<br>(100) | Proteobacteria<br>(100) | Gammaproteobacteria<br>(100) | Alteromonadales<br>(100)   | Shewanellaceae<br>(100)        | <i>Shewanella</i><br>(100)       |
| OTU1266 | Bacteria          | Actinobacteria<br>(96)  | Actinobacteria<br>(96)       | Pseudonocardiales<br>(95)  | Pseudonocardiaceae<br>(74)     | unclassified<br>(<50)            |
| OTU1267 | Bacteria<br>(100) | Actinobacteria<br>(100) | Actinobacteria<br>(100)      | Pseudonocardiales<br>(100) | Pseudonocardiaceae<br>(80)     | unclassified<br>(<50)            |
| OTU1268 | Bacteria<br>(100) | Proteobacteria<br>(100) | Gammaproteobacteria<br>(100) | Oceanospirillales<br>(95)  | Alcanivoracaceae<br>(94)       | <i>Alcanivorax</i><br>(94)       |
| OTU1269 | Bacteria<br>(100) | Proteobacteria<br>(99)  | Betaproteobacteria<br>(82)   | Neisseriales<br>(78)       | Neisseriaceae<br>(78)          | unclassified<br>(<50)            |
| OTU1270 | Bacteria<br>(100) | Proteobacteria<br>(100) | Gammaproteobacteria<br>(100) | Vibrionales<br>(100)       | Vibrionaceae<br>(100)          | <i>Listonella</i><br>(88)        |
| OTU1271 | Bacteria<br>(100) | Proteobacteria<br>(99)  | Gammaproteobacteria<br>(99)  | Pseudomonadales<br>(85)    | Pseudomonadaceae<br>(85)       | <i>Pseudomonas</i><br>(54)       |
| OTU1272 | Bacteria<br>(100) | Proteobacteria<br>(100) | Gammaproteobacteria<br>(100) | Vibrionales<br>(99)        | Vibrionaceae<br>(99)           | <i>Listonella</i><br>(84)        |

|         |                   |                               |                              |                            |                            |                               |
|---------|-------------------|-------------------------------|------------------------------|----------------------------|----------------------------|-------------------------------|
| OTU1273 | Bacteria<br>(100) | Proteobacteria<br>(100)       | Gammaproteobacteria<br>(100) | Vibrionales<br>(90)        | Vibrionaceae<br>(90)       | unclassified<br>(<50)         |
| OTU1274 | Bacteria<br>(100) | Proteobacteria<br>(100)       | Alphaproteobacteria<br>(100) | Rhodobacterales<br>(97)    | Rhodobacteraceae<br>(97)   | unclassified<br>(<50)         |
| OTU1275 | Bacteria<br>(100) | Proteobacteria<br>(99)        | Gammaproteobacteria<br>(99)  | Oceanospirillales<br>(54)  | unclassified<br>(<50)      | unclassified<br>(<50)         |
| OTU1276 | Bacteria<br>(100) | Proteobacteria<br>(100)       | Gammaproteobacteria<br>(100) | Vibrionales<br>(100)       | Vibrionaceae<br>(100)      | unclassified<br>(<50)         |
| OTU1277 | Bacteria<br>(100) | Proteobacteria<br>(100)       | Gammaproteobacteria<br>(100) | Vibrionales<br>(100)       | Vibrionaceae<br>(100)      | <i>Listonella</i><br>(90)     |
| OTU1278 | Bacteria<br>(100) | Deinococcus-<br>Thermus (100) | Deinococci<br>(100)          | Thermales<br>(100)         | Thermaceae<br>(100)        | <i>Thermus</i><br>(100)       |
| OTU1279 | Bacteria<br>(100) | Proteobacteria<br>(98)        | Gammaproteobacteria<br>(96)  | Pseudomonadales<br>(94)    | Moraxellaceae<br>(94)      | <i>Acinetobacter</i><br>(70)  |
| OTU1280 | Bacteria<br>(100) | Proteobacteria<br>(100)       | Gammaproteobacteria<br>(100) | Vibrionales<br>(100)       | Vibrionaceae<br>(100)      | <i>Lucibacterium</i><br>(82)  |
| OTU1281 | Bacteria<br>(100) | Actinobacteria<br>(100)       | Actinobacteria<br>(100)      | Pseudonocardiales<br>(100) | Pseudonocardiaceae<br>(99) | unclassified<br>(<50)         |
| OTU1282 | Bacteria<br>(100) | Proteobacteria<br>(100)       | Gammaproteobacteria<br>(100) | Vibrionales<br>(100)       | Vibrionaceae<br>(100)      | <i>Allomonas</i><br>(75)      |
| OTU1283 | Bacteria<br>(100) | Actinobacteria<br>(99)        | Actinobacteria<br>(99)       | Pseudonocardiales<br>(99)  | Pseudonocardiaceae<br>(87) | unclassified<br>(<50)         |
| OTU1284 | Bacteria<br>(100) | Firmicutes<br>(100)           | Bacilli<br>(100)             | Lactobacillales<br>(100)   | Leuconostocaceae<br>(100)  | <i>Leuconostoc</i><br>(100)   |
| OTU1285 | Bacteria<br>(100) | Proteobacteria<br>(100)       | Alphaproteobacteria<br>(100) | Rhodobacterales<br>(97)    | Rhodobacteraceae<br>(97)   | unclassified<br>(<50)         |
| OTU1286 | Bacteria<br>(100) | Proteobacteria<br>(100)       | Gammaproteobacteria<br>(100) | Vibrionales<br>(100)       | Vibrionaceae<br>(100)      | <i>Allomonas</i><br>(59)      |
| OTU1287 | Bacteria<br>(100) | Firmicutes<br>(99)            | Bacilli<br>(98)              | Bacillales<br>(91)         | Staphylococcaceae<br>(83)  | <i>Staphylococcus</i><br>(60) |
| OTU1288 | Bacteria<br>(100) | Proteobacteria<br>(100)       | Gammaproteobacteria<br>(100) | Vibrionales<br>(100)       | Vibrionaceae<br>(100)      | <i>Allomonas</i><br>(66)      |
| OTU1289 | Bacteria<br>(100) | Proteobacteria<br>(100)       | Gammaproteobacteria<br>(100) | Pseudomonadales<br>(97)    | Pseudomonadaceae<br>(97)   | <i>Pseudomonas</i><br>(69)    |
| OTU1290 | Bacteria<br>(100) | Proteobacteria<br>(100)       | Gammaproteobacteria<br>(100) | Vibrionales<br>(100)       | Vibrionaceae<br>(100)      | <i>Vibrio</i><br>(63)         |
| OTU1291 | Bacteria<br>(100) | Proteobacteria<br>(100)       | Gammaproteobacteria<br>(100) | Vibrionales<br>(100)       | Vibrionaceae<br>(100)      | <i>Allomonas</i><br>(57)      |
| OTU1292 | Bacteria<br>(100) | Proteobacteria<br>(100)       | Gammaproteobacteria<br>(100) | Vibrionales<br>(100)       | Vibrionaceae<br>(100)      | <i>Allomonas</i><br>(80)      |
| OTU1293 | Bacteria<br>(100) | Proteobacteria<br>(100)       | Gammaproteobacteria<br>(100) | Vibrionales<br>(100)       | Vibrionaceae<br>(100)      | <i>Allomonas</i><br>(64)      |
| OTU1294 | Bacteria<br>(100) | Proteobacteria<br>(100)       | Gammaproteobacteria<br>(100) | Pseudomonadales<br>(93)    | Moraxellaceae<br>(93)      | <i>Acinetobacter</i><br>(92)  |
| OTU1295 | Bacteria<br>(100) | Firmicutes<br>(100)           | Bacilli<br>(100)             | Bacillales<br>(92)         | Listeriaceae<br>(92)       | <i>Brochothrix</i><br>(92)    |
| OTU1296 | Bacteria<br>(100) | Firmicutes<br>(99)            | Bacilli<br>(99)              | Lactobacillales<br>(95)    | Lactobacillaceae<br>(68)   | <i>Lactobacillus</i><br>(57)  |



|         |                   |                         |                              |                            |                             |                                 |
|---------|-------------------|-------------------------|------------------------------|----------------------------|-----------------------------|---------------------------------|
| OTU1297 | Bacteria<br>(100) | Proteobacteria<br>(100) | Gammaproteobacteria<br>(100) | Vibrionales<br>(100)       | Vibrionaceae<br>(100)       | unclassified<br>(<50)           |
| OTU1298 | Bacteria<br>(100) | Firmicutes<br>(100)     | Bacilli<br>(100)             | Bacillales<br>(97)         | unclassified<br>(<50)       | unclassified<br>(<50)           |
| OTU1299 | Bacteria<br>(100) | Actinobacteria<br>(100) | Actinobacteria<br>(100)      | Pseudonocardiales<br>(100) | Pseudonocardiaceae<br>(82)  | unclassified<br>(<50)           |
| OTU1300 | Bacteria<br>(100) | Actinobacteria<br>(100) | Actinobacteria<br>(100)      | Pseudonocardiales<br>(99)  | Pseudonocardiaceae<br>(95)  | unclassified<br>(<50)           |
| OTU1301 | Bacteria<br>(95)  | unclassified<br>(<50)   | unclassified<br>(<50)        | unclassified<br>(<50)      | unclassified<br>(<50)       | unclassified<br>(<50)           |
| OTU1302 | Bacteria<br>(99)  | unclassified<br>(<50)   | unclassified<br>(<50)        | unclassified<br>(<50)      | unclassified<br>(<50)       | unclassified<br>(<50)           |
| OTU1303 | Bacteria<br>(100) | Bacteroidetes<br>(98)   | Sphingobacteria<br>(90)      | Sphingobacteriales<br>(90) | Saprospiraceae<br>(86)      | unclassified<br>(<50)           |
| OTU1304 | Bacteria<br>(100) | Actinobacteria<br>(98)  | Actinobacteria<br>(98)       | Pseudonocardiales<br>(98)  | Pseudonocardiaceae<br>(83)  | unclassified<br>(<50)           |
| OTU1305 | Bacteria<br>(100) | Proteobacteria<br>(100) | Alphaproteobacteria<br>(100) | Rhodobacterales<br>(59)    | Rhodobacteraceae<br>(59)    | unclassified<br>(<50)           |
| OTU1306 | Bacteria<br>(100) | Proteobacteria<br>(100) | Gammaproteobacteria<br>(100) | Vibrionales<br>(100)       | Vibrionaceae<br>(100)       | <i>Allomonas</i><br>(62)        |
| OTU1307 | Bacteria<br>(100) | Proteobacteria<br>(100) | Gammaproteobacteria<br>(100) | Oceanospirillales<br>(100) | Oceanospirillaceae<br>(100) | <i>Marinomonas</i><br>(100)     |
| OTU1308 | Bacteria<br>(100) | Proteobacteria<br>(100) | Alphaproteobacteria<br>(100) | Rhodobacterales<br>(87)    | Rhodobacteraceae<br>(87)    | <i>Roseicyclus</i><br>(51)      |
| OTU1309 | Bacteria<br>(100) | Proteobacteria<br>(100) | Gammaproteobacteria<br>(100) | Vibrionales<br>(99)        | Vibrionaceae<br>(99)        | <i>Allomonas</i><br>(87)        |
| OTU1310 | Bacteria<br>(100) | Proteobacteria<br>(100) | Gammaproteobacteria<br>(87)  | Vibrionales<br>(86)        | Vibrionaceae<br>(86)        | <i>Allomonas</i><br>(76)        |
| OTU1311 | Bacteria<br>(100) | Proteobacteria<br>(100) | Gammaproteobacteria<br>(99)  | Aeromonadales<br>(75)      | Aeromonadaceae<br>(75)      | <i>Aeromonas</i><br>(65)        |
| OTU1312 | Bacteria<br>(100) | Actinobacteria<br>(100) | Actinobacteria<br>(100)      | Pseudonocardiales<br>(98)  | Pseudonocardiaceae<br>(78)  | unclassified<br>(<50)           |
| OTU1313 | Bacteria<br>(100) | Proteobacteria<br>(100) | Gammaproteobacteria<br>(100) | Vibrionales<br>(100)       | Vibrionaceae<br>(100)       | <i>Allomonas</i><br>(57)        |
| OTU1314 | Bacteria<br>(100) | Proteobacteria<br>(100) | Gammaproteobacteria<br>(100) | Vibrionales<br>(98)        | Vibrionaceae<br>(98)        | unclassified<br>(<50)           |
| OTU1315 | Bacteria<br>(100) | Bacteroidetes<br>(100)  | Flavobacteria<br>(100)       | Flavobacteriales<br>(100)  | Flavobacteriaceae<br>(100)  | <i>Cloacibacterium</i><br>(100) |
| OTU1316 | Bacteria<br>(100) | Planctomycets<br>(51)   | Planctomycetia<br>(51)       | unclassified<br>(<50)      | unclassified<br>(<50)       | unclassified<br>(<50)           |
| OTU1317 | Bacteria<br>(100) | Proteobacteria<br>(100) | Gammaproteobacteria<br>(100) | Vibrionales<br>(100)       | Vibrionaceae<br>(100)       | <i>Allomonas</i><br>(70)        |
| OTU1318 | Bacteria<br>(100) | Proteobacteria<br>(100) | Gammaproteobacteria<br>(100) | Vibrionales<br>(80)        | Vibrionaceae<br>(80)        | unclassified<br>(<50)           |
| OUT1319 | Bacteria<br>(100) | Proteobacteria<br>(100) | Gammaproteobacteria<br>(100) | Pseudomonadales<br>(100)   | Moraxellaceae<br>(100)      | <i>Acinetobacter</i><br>(100)   |
| OUT1320 | Bacteria<br>(100) | Proteobacteria<br>(100) | Gammaproteobacteria<br>(100) | Vibrionales<br>(100)       | Vibrionaceae<br>(100)       | <i>Listonella</i><br>(77)       |

|         |                   |                         |                              |                            |                                |                                     |
|---------|-------------------|-------------------------|------------------------------|----------------------------|--------------------------------|-------------------------------------|
| OUT1321 | Bacteria<br>(100) | Proteobacteria<br>(100) | Gammaproteobacteria<br>(100) | Alteromonadales<br>(100)   | Shewanellaceae<br>(100)        | <i>Shewanella</i><br>(100)          |
| OUT1322 | Bacteria<br>(100) | Actinobacteria<br>(99)  | Actinobacteria<br>(99)       | Pseudonocardiales<br>(98)  | Pseudonocardiaceae<br>(79)     | unclassified<br>(<50)               |
| OUT1323 | Bacteria<br>(100) | Actinobacteria<br>(100) | Actinobacteria<br>(100)      | Pseudonocardiales<br>(100) | Pseudonocardiaceae<br>(80)     | unclassified<br>(<50)               |
| OUT1324 | Bacteria<br>(100) | Actinobacteria<br>(100) | Actinobacteria<br>(100)      | Pseudonocardiales<br>(100) | Pseudonocardiaceae<br>(97)     | unclassified<br>(<50)               |
| OUT1325 | Bacteria<br>(100) | Actinobacteria<br>(100) | Actinobacteria<br>(100)      | Pseudonocardiales<br>(100) | unclassified<br>(<50)          | unclassified<br>(<50)               |
| OUT1326 | Bacteria<br>(100) | Proteobacteria<br>(100) | Gammaproteobacteria<br>(100) | Vibrionales<br>(100)       | Vibrionaceae<br>(100)          | <i>Allomonas</i><br>(77)            |
| OUT1327 | Bacteria<br>(100) | Proteobacteria<br>(100) | Alphaproteobacteria<br>(100) | Rhodobacterales<br>(99)    | Rhodobacteraceae<br>(99)       | unclassified<br>(<50)               |
| OUT1328 | Bacteria<br>(100) | Proteobacteria<br>(100) | Gammaproteobacteria<br>(100) | Vibrionales<br>(100)       | Vibrionaceae<br>(100)          | <i>Vibrio</i><br>(68)               |
| OUT1329 | Bacteria<br>(100) | Proteobacteria<br>(100) | Alphaproteobacteria<br>(100) | Rhodospirillales<br>(100)  | Rhodospirillaceae<br>(98)      | <i>Azospirillum</i><br>(86)         |
| OUT1330 | Bacteria<br>(100) | Proteobacteria<br>(100) | Gammaproteobacteria<br>(100) | Vibrionales<br>(100)       | Vibrionaceae<br>(100)          | <i>Lucibacterium</i><br>(52)        |
| OUT1331 | Bacteria<br>(100) | Proteobacteria<br>(100) | Gammaproteobacteria<br>(100) | Vibrionales<br>(100)       | Vibrionaceae<br>(100)          | <i>Allomonas</i><br>(81)            |
| OUT1332 | Bacteria<br>(100) | Firmicutes<br>(99)      | Bacilli<br>(90)              | Bacillales<br>(82)         | Staphylococcaceae<br>(67)      | <i>Staphylococcus</i><br>(50)       |
| OUT1333 | Bacteria<br>(100) | Proteobacteria<br>(100) | Gammaproteobacteria<br>(100) | Aeromonadales<br>(100)     | Aeromonadaceae<br>(100)        | <i>Aeromonas</i><br>(100)           |
| OUT1334 | Bacteria<br>(100) | Proteobacteria<br>(100) | Gammaproteobacteria<br>(100) | Vibrionales<br>(90)        | Vibrionaceae<br>(90)           | unclassified<br>(<50)               |
| OUT1335 | Bacteria<br>(100) | Proteobacteria<br>(100) | Gammaproteobacteria<br>(95)  | Alteromonadales<br>(93)    | Pseudoalteromonadaceae<br>(83) | <i>Pseudoalteromonas</i><br>(63)    |
| OUT1336 | Bacteria<br>(100) | Proteobacteria<br>(100) | Gammaproteobacteria<br>(100) | Vibrionales<br>(100)       | Vibrionaceae<br>(100)          | <i>Vibrio</i><br>(63)               |
| OUT1337 | Bacteria<br>(100) | Proteobacteria<br>(100) | Gammaproteobacteria<br>(100) | Vibrionales<br>(100)       | Vibrionaceae<br>(100)          | <i>Listonella</i><br>(62)           |
| OUT1338 | Bacteria<br>(100) | Actinobacteria<br>(80)  | Actinobacteria<br>(80)       | Pseudonocardiales<br>(80)  | Pseudonocardiaceae<br>(67)     | unclassified<br>(<50)               |
| OUT1339 | Bacteria<br>(100) | Proteobacteria<br>(100) | Gammaproteobacteria<br>(100) | Vibrionales<br>(100)       | Vibrionaceae<br>(100)          | unclassified<br>(<50)               |
| OUT1340 | Bacteria<br>(100) | Proteobacteria<br>(100) | Gammaproteobacteria<br>(100) | Vibrionales<br>(97)        | Vibrionaceae<br>(97)           | <i>Allomonas</i><br>(78)            |
| OUT1341 | Bacteria<br>(100) | Actinobacteria<br>(80)  | Actinobacteria<br>(80)       | Pseudonocardiales<br>(80)  | Pseudonocardiaceae<br>(70)     | unclassified<br>(<50)               |
| OUT1342 | Bacteria<br>(100) | Proteobacteria<br>(100) | Gammaproteobacteria<br>(100) | Enterobacteriales<br>(100) | Enterobacteriaceae<br>(100)    | <i>Escherichia/Shigella</i><br>(98) |
| OTU1343 | Bacteria<br>(100) | Proteobacteria<br>(100) | Gammaproteobacteria<br>(100) | Pseudomonadales<br>(100)   | Moraxellaceae<br>(100)         | <i>Acinetobacter</i><br>(100)       |
| OTU1344 | Bacteria          | Proteobacteria<br>(99)  | Gammaproteobacteria<br>(99)  | Vibrionales<br>(76)        | Vibrionaceae<br>(76)           | unclassified<br>(<50)               |

|         |                   |                         |                              |                            |                                          |                                 |
|---------|-------------------|-------------------------|------------------------------|----------------------------|------------------------------------------|---------------------------------|
| OTU1345 | Bacteria<br>(100) | Proteobacteria<br>(100) | Gammaproteobacteria<br>(100) | Vibrionales<br>(100)       | Vibrionaceae<br>(100)                    | <i>Allomonas</i><br>(78)        |
| OTU1346 | Bacteria<br>(100) | Firmicutes<br>(100)     | Clostridia<br>(100)          | Clostridiales<br>(100)     | Clostridiales_Incertae Sedis<br>XI (100) | <i>Peptoniphilus</i><br>(100)   |
| OTU1347 | Bacteria<br>(100) | Proteobacteria<br>(100) | Gammaproteobacteria<br>(100) | Vibrionales<br>(100)       | Vibrionaceae<br>(100)                    | <i>Allomonas</i><br>(74)        |
| OTU1348 | Bacteria<br>(100) | Proteobacteria<br>(100) | Gammaproteobacteria<br>(100) | Vibrionales<br>(97)        | Vibrionaceae<br>(97)                     | unclassified<br>(<50)           |
| OTU1349 | Bacteria<br>(100) | Proteobacteria<br>(100) | Gammaproteobacteria<br>(100) | Aeromonadales<br>(99)      | Aeromonadaceae<br>(99)                   | <i>Aeromonas</i><br>(99)        |
| OTU1350 | Bacteria<br>(100) | Proteobacteria<br>(100) | Gammaproteobacteria<br>(100) | Pseudomonadales<br>(99)    | Moraxellaceae<br>(99)                    | <i>Acinetobacter</i><br>(97)    |
| OTU1351 | Bacteria<br>(100) | Proteobacteria<br>(100) | Gammaproteobacteria<br>(100) | Vibrionales<br>(100)       | Vibrionaceae<br>(100)                    | unclassified<br>(<50)           |
| OTU1352 | Bacteria<br>(100) | Actinobacteria<br>(100) | Actinobacteria<br>(100)      | Pseudonocardiales<br>(100) | unclassified<br>(<50)                    | unclassified<br>(<50)           |
| OTU1353 | Bacteria<br>(100) | Proteobacteria<br>(100) | Gammaproteobacteria<br>(100) | Vibrionales<br>(100)       | Vibrionaceae<br>(100)                    | <i>Allomonas</i><br>(52)        |
| OTU1354 | Bacteria<br>(100) | Bacteroidetes<br>(97)   | Sphingobacteria<br>(90)      | Sphingobacteriales<br>(90) | Saprosiraceae<br>(79)                    | <i>Halicomenobacter</i><br>(75) |
| OTU1355 | Bacteria<br>(100) | Proteobacteria<br>(100) | Gammaproteobacteria<br>(100) | Vibrionales<br>(100)       | Vibrionaceae<br>(100)                    | <i>Lucibacterium</i><br>(69)    |
| OTU1356 | Bacteria<br>(100) | Proteobacteria<br>(100) | Gammaproteobacteria<br>(100) | Vibrionales<br>(90)        | Vibrionaceae<br>(90)                     | <i>Allomonas</i><br>(66)        |
| OTU1357 | Bacteria<br>(100) | Proteobacteria<br>(100) | Gammaproteobacteria<br>(100) | Vibrionales<br>(100)       | Vibrionaceae<br>(100)                    | <i>Lucibacterium</i><br>(76)    |
| OTU1358 | Bacteria<br>(99)  | unclassified<br>(<50)   | unclassified<br>(<50)        | unclassified<br>(<50)      | unclassified<br>(<50)                    | unclassified<br>(<50)           |
| OTU1359 | Bacteria<br>(100) | Actinobacteria<br>(100) | Actinobacteria<br>(100)      | Pseudonocardiales<br>(100) | Pseudonocardiaceae<br>(83)               | unclassified<br>(<50)           |
| OTU1360 | Bacteria<br>(100) | Proteobacteria<br>(100) | Gammaproteobacteria<br>(100) | Pseudomonadales<br>(100)   | Moraxellaceae<br>(100)                   | <i>Acinetobacter</i><br>(99)    |
| OTU1361 | Bacteria<br>(100) | Proteobacteria<br>(100) | Gammaproteobacteria<br>(100) | Vibrionales<br>(100)       | Vibrionaceae<br>(100)                    | <i>Allomonas</i><br>(76)        |
| OTU1362 | Bacteria<br>(100) | Proteobacteria<br>(99)  | Gammaproteobacteria<br>(98)  | Vibrionales<br>(97)        | Vibrionaceae<br>(97)                     | <i>Allomonas</i><br>(86)        |
| OTU1363 | Bacteria<br>(100) | Proteobacteria<br>(100) | Gammaproteobacteria<br>(100) | Vibrionales<br>(100)       | Vibrionaceae<br>(100)                    | <i>Allomonas</i><br>(70)        |
| OTU1364 | Bacteria<br>(100) | Actinobacteria<br>(100) | Actinobacteria<br>(100)      | Pseudonocardiales<br>(100) | Pseudonocardiaceae<br>(94)               | unclassified<br>(<50)           |
| OTU1365 | Bacteria<br>(100) | Proteobacteria<br>(100) | Gammaproteobacteria<br>(100) | Vibrionales<br>(99)        | Vibrionaceae<br>(99)                     | unclassified<br>(<50)           |
| OTU1366 | Bacteria<br>(100) | Proteobacteria<br>(100) | Gammaproteobacteria<br>(100) | Enterobacteriales<br>(100) | Enterobacteriaceae<br>(100)              | unclassified<br>(<50)           |
| OUT1367 | Bacteria<br>(100) | Actinobacteria<br>(100) | Actinobacteria<br>(100)      | Pseudonocardiales<br>(100) | Pseudonocardiaceae<br>(99)               | unclassified<br>(<50)           |
| OUT1368 | Bacteria<br>(100) | Proteobacteria<br>(100) | Gammaproteobacteria<br>(100) | Vibrionales<br>(99)        | Vibrionaceae<br>(99)                     | <i>Allomonas</i><br>(57)        |

|         |                   |                         |                              |                            |                                |                                  |
|---------|-------------------|-------------------------|------------------------------|----------------------------|--------------------------------|----------------------------------|
| OUT1369 | Bacteria<br>(100) | Actinobacteria<br>(84)  | Actinobacteria<br>(84)       | Acidimicrobiales<br>(51)   | Acidimicrobiaceae<br>(51)      | unclassified<br>(<50)            |
| OUT1370 | Bacteria<br>(100) | Proteobacteria<br>(100) | Gammaproteobacteria<br>(100) | Aeromonadales<br>(97)      | Aeromonadaceae<br>(97)         | <i>Aeromonas</i><br>(94)         |
| OUT1371 | Bacteria<br>(100) | Actinobacteria<br>(100) | Actinobacteria<br>(100)      | Pseudonocardiales<br>(100) | Pseudonocardiaceae<br>(88)     | unclassified<br>(<50)            |
| OUT1372 | Bacteria<br>(100) | Actinobacteria<br>(100) | Actinobacteria<br>(100)      | Pseudonocardiales<br>(100) | Pseudonocardiaceae<br>(84)     | unclassified<br>(<50)            |
| OUT1373 | Bacteria<br>(100) | Proteobacteria<br>(100) | Gammaproteobacteria<br>(100) | Vibrionales<br>(73)        | Vibrionaceae<br>(73)           | unclassified<br>(<50)            |
| OUT1374 | Bacteria<br>(100) | Actinobacteria<br>(100) | Actinobacteria<br>(100)      | Pseudonocardiales<br>(100) | Pseudonocardiaceae<br>(89)     | unclassified<br>(<50)            |
| OUT1375 | Bacteria<br>(100) | Proteobacteria<br>(100) | Gammaproteobacteria<br>(100) | Alteromonadales<br>(100)   | Pseudoalteromonadaceae<br>(96) | <i>Pseudoalteromonas</i><br>(96) |
| OUT1376 | Bacteria<br>(100) | Proteobacteria<br>(100) | Gammaproteobacteria<br>(100) | Vibrionales<br>(99)        | Vibrionaceae<br>(99)           | <i>Listonella</i><br>(60)        |
| OUT1377 | Bacteria<br>(100) | Proteobacteria<br>(100) | Gammaproteobacteria<br>(100) | Vibrionales<br>(100)       | Vibrionaceae<br>(100)          | <i>Allomonas</i><br>(76)         |
| OUT1378 | Bacteria<br>(100) | Proteobacteria<br>(100) | Alphaproteobacteria<br>(100) | Rhodobacterales<br>(98)    | Rhodobacteraceae<br>(98)       | unclassified<br>(<50)            |
| OUT1379 | Bacteria<br>(99)  | Proteobacteria<br>(78)  | unclassified<br>(<50)        | unclassified<br>(<50)      | unclassified<br>(<50)          | unclassified<br>(<50)            |
| OUT1380 | Bacteria<br>(100) | Actinobacteria<br>(100) | Actinobacteria<br>(100)      | Pseudonocardiales<br>(97)  | Pseudonocardiaceae<br>(78)     | unclassified<br>(<50)            |
| OUT1381 | Bacteria<br>(100) | Proteobacteria<br>(100) | Gammaproteobacteria<br>(100) | Vibrionales<br>(74)        | Vibrionaceae<br>(74)           | unclassified<br>(<50)            |
| OUT1382 | Bacteria<br>(100) | Actinobacteria<br>(99)  | Actinobacteria<br>(99)       | Pseudonocardiales<br>(98)  | Pseudonocardiaceae<br>(77)     | unclassified<br>(<50)            |
| OUT1383 | Bacteria<br>(100) | Actinobacteria<br>(100) | Actinobacteria<br>(100)      | Pseudonocardiales<br>(100) | Pseudonocardiaceae<br>(86)     | unclassified<br>(<50)            |
| OUT1384 | Bacteria<br>(100) | Proteobacteria<br>(100) | Gammaproteobacteria<br>(100) | Vibrionales<br>(100)       | Vibrionaceae<br>(100)          | <i>Listonella</i><br>(82)        |
| OUT1385 | Bacteria<br>(100) | Proteobacteria<br>(100) | Gammaproteobacteria<br>(100) | Pseudomonadales<br>(98)    | Pseudomonadaceae<br>(98)       | <i>Pseudomonas</i><br>(70)       |
| OUT1386 | Bacteria<br>(100) | Proteobacteria<br>(100) | Gammaproteobacteria<br>(100) | Vibrionales<br>(100)       | Vibrionaceae<br>(100)          | <i>Vibrio</i><br>(84)            |
| OUT1387 | Bacteria<br>(100) | Proteobacteria<br>(100) | Gammaproteobacteria<br>(100) | Vibrionales<br>(100)       | Vibrionaceae<br>(100)          | unclassified<br>(<50)            |
| OUT1388 | Bacteria<br>(100) | Proteobacteria<br>(100) | Gammaproteobacteria<br>(100) | Vibrionales<br>(100)       | Vibrionaceae<br>(100)          | <i>Allomonas</i><br>(68)         |
| OUT1389 | Bacteria<br>(100) | Proteobacteria<br>(100) | Gammaproteobacteria<br>(99)  | Vibrionales<br>(97)        | Vibrionaceae<br>(97)           | <i>Allomonas</i><br>(53)         |
| OUT1390 | Bacteria<br>(100) | Proteobacteria<br>(100) | Gammaproteobacteria<br>(100) | Pseudomonadales<br>(100)   | Moraxellaceae<br>(100)         | <i>Acinetobacter</i><br>(100)    |

|         |                   |                         |                              |                            |                            |                       |
|---------|-------------------|-------------------------|------------------------------|----------------------------|----------------------------|-----------------------|
| OTU1391 | Bacteria<br>(100) | Proteobacteria<br>(100) | Gammaproteobacteria<br>(100) | Vibrionales<br>(99)        | Vibrionaceae<br>(99)       | unclassified<br>(<50) |
| OTU1392 | Bacteria<br>(100) | Actinobacteria<br>(98)  | Actinobacteria<br>(98)       | Pseudonocardiales<br>(96)  | unclassified<br>(<50)      | unclassified<br>(<50) |
| OTU1393 | Bacteria<br>(100) | Proteobacteria<br>(100) | Alphaproteobacteria<br>(100) | Rhodobacterales<br>(70)    | Rhodobacteraceae<br>(70)   | unclassified<br>(<50) |
| OTU1394 | Bacteria<br>(100) | Actinobacteria<br>(100) | Actinobacteria<br>(100)      | Pseudonocardiales<br>(100) | Pseudonocardiaceae<br>(92) | unclassified<br>(<50) |

**Table S2. BLAST homologies for the OTUs found at least five times**

| OTUs    | Best BLAST homology                                                                             | Entry    | %  | sample                                                                   |
|---------|-------------------------------------------------------------------------------------------------|----------|----|--------------------------------------------------------------------------|
| OTU0001 | Uncultured <i>Saccharopolyspora</i> sp. clone VE21-K19 16S ribosomal RNA gene, partial sequence | KF767307 | 99 | parchment                                                                |
| OTU0002 | <i>Saccharopolyspora</i> sp. AFM 10238 16S ribosomal RNA gene, partial sequence                 | KF673492 | 98 | Dead Sea                                                                 |
| OTU0003 | Uncultured bacterium clone I3Q1XXJ02CAUFP 16S ribosomal RNA gene, partial sequence              | KP952426 | 99 | intestinal flora of black tiger shrimp                                   |
| OTU0004 | <i>Saccharopolyspora</i> sp. 13-18-42 16S ribosomal RNA gene, partial sequence                  | KM886189 | 99 | sponge, South China Sea                                                  |
| OTU0005 | <i>Pseudoalteromonas</i> sp. H6 16S ribosomal RNA gene, partial sequence                        | KX236489 | 99 | seawater                                                                 |
| OTU0006 | Uncultured bacterium clone HYPJBHH15I4RDY 16S ribosomal RNA gene, partial sequence              | KF316172 | 99 | hydraulic fracturing fluids and produced water from shale gas extraction |
| OTU0007 | <i>Acinetobacter</i> sp. G2-5 partial 16S rRNA gene, isolate G2-5                               | LK054569 | 99 | anchihaline waters, Western Mediterranean coastal cave                   |
| OTU0008 | <i>Aeromonas veronii</i> strain CB51, complete genome                                           | CP015448 | 99 | blood                                                                    |
| OTU0009 | Uncultured bacterium clone I3Q1XXJ02BWIF9 16S ribosomal RNA gene, partial sequence              | KP953689 | 99 | intestinal flora of black tiger shrimp                                   |
| OTU0010 | Uncultured bacterium clone I3Q1XXJ02BTJK5 16S ribosomal RNA gene, partial sequence              | KP952131 | 99 | intestinal flora of black tiger shrimp                                   |
| OTU0011 | <i>Acinetobacter pittii</i> strain IITRC19 16S ribosomal RNA gene, partial sequence             | KU715842 | 99 | pulp paper mill discharged sludge                                        |
| OTU0012 | <i>Staphylococcus aureus</i> strain ST20130938, complete genome                                 | CP012978 | 99 | hip prosthesis infection                                                 |
| OTU0013 | <i>Pseudomonas</i> sp. G3-45 partial 16S rRNA gene, isolate G3-45                               | LK054584 | 99 | anchihaline waters, Western Mediterranean coastal cave                   |
| OTU0014 | Uncultured bacterium clone nbw525c03c1 16S ribosomal RNA                                        | GQ105040 | 99 | skin, volar forearm                                                      |

|         |                                                                                                 |          |     |                                                                |
|---------|-------------------------------------------------------------------------------------------------|----------|-----|----------------------------------------------------------------|
|         | gene, partial sequence                                                                          |          |     |                                                                |
| OTU0015 | Uncultured Pseudonocardiaceae bacterium partial 16S rRNA gene, clone IZ35.2_K11                 | FN689586 | 99  | fragment of paper bulls of indulgence of the 15th-16th century |
| OTU0016 | <i>Pantoea agglomerans</i> strain XF1 16S ribosomal RNA gene, partial sequence                  | KU373053 | 99  | sugar industry                                                 |
| OTU0017 | <i>Phyllobacterium</i> sp. JCM 28305 gene for 16S ribosomal RNA, partial                        | LC133652 | 99  | stone chambers of the Takamatsuzuka and Kitora Tumuli          |
| OTU0018 | <i>Enterococcus hirae</i> strain RCB498 16S ribosomal RNA gene, partial sequence                | KT260710 | 100 | bat guano                                                      |
| OTU0019 | Uncultured <i>Saccharopolyspora</i> sp. clone VE21-K36 16S ribosomal RNA gene, partial sequence | KF767309 | 99  | parchment                                                      |
| OTU0020 | Uncultured Corynebacterineae bacterium clone 5788 16S ribosomal RNA gene, partial sequence      | KP106988 | 100 | fecal sample                                                   |
| OTU0021 | Uncultured bacterium clone G4TICC403GDU7W 16S ribosomal RNA gene, partial sequence              | JQ074296 | 99  | indoor air                                                     |
| OTU0022 | Uncultured bacterium clone G7DUZBG01BCKNP 16S ribosomal RNA gene, partial sequence              | JX940887 | 99  | intestinal flora of black tiger shrimp                         |
| OTU0023 | <i>Bacillus amyloliquefaciens</i> strain CH-04 16S ribosomal RNA gene, partial sequence         | KU352764 | 99  | coastal marine water, Tamil Nadu, India                        |
| OTU0024 | <i>Escherichia coli</i> strain RCB930 16S ribosomal RNA gene, partial sequence                  | KT261142 | 100 | bat guano                                                      |
| OTU0025 | Uncultured bacterium clone GXTJ5A301AX3JO 16S ribosomal RNA gene, partial sequence              | KF332701 | 99  | intestinal flora of black tiger shrimp                         |
| OTU0026 | Uncultured <i>Saccharopolyspora</i> sp. clone VE21-K19 16S ribosomal RNA gene, partial sequence | KF767307 | 98  | parchment                                                      |
| OTU0027 | Uncultured bacterium clone OTU_23810 16S ribosomal RNA gene,                                    | KR855094 | 99  | soil of a tobacco plantation                                   |

|         |                                                                                                     |           |     |                                                                          |
|---------|-----------------------------------------------------------------------------------------------------|-----------|-----|--------------------------------------------------------------------------|
|         | partial sequence                                                                                    |           |     |                                                                          |
| OTU0028 | <i>Saccharopolyspora qijiaojiangensis</i> strain YIM 91168 16S ribosomal RNA gene, partial sequence | NR_116107 | 99  | salt lake                                                                |
| OTU0029 | Uncultured bacterium clone I3Q1XXJ01BC414 16S ribosomal RNA gene, partial sequence                  | KP953369  | 99  | intestinal flora of black tiger shrimp                                   |
| OTU0030 | <i>Vibrio ponticus</i> strain SB6 16S ribosomal RNA, partial sequence                               | KU249214  | 99  | fish                                                                     |
| OTU0031 | Uncultured bacterium clone OTU_81 16S ribosomal RNA gene, partial sequence                          | KT360371  | 99  | Pu-erh tea                                                               |
| OTU0032 | <i>Acinetobacter tjernbergiae</i> strain T40 16S ribosomal RNA gene, partial sequence               | KU991570  | 100 | surface water                                                            |
| OTU0033 | Uncultured bacterium clone nbw14e10c1 16S ribosomal RNA gene, partial sequence                      | GQ060210  | 99  | human skin, external auditory canal                                      |
| OTU0034 | <i>Pseudomonas indoloxydans</i> strain Bss-13a 16S ribosomal RNA gene                               | KX161387  | 99  | halophilic and halotolerant bacteria from Badab-e Surt travertine spring |
| OTU0035 | <i>Alteromonas confluentis</i> strain DSSK2-12 16S ribosomal RNA, partial sequence                  | NR_137375 | 99  | water from the junction between the ocean and a freshwater spring        |
| OTU0036 | Uncultured bacterium clone nbw212d06c1 16S ribosomal RNA gene partial sequence                      | GQ073741  | 98  | skin microbiome                                                          |
| OTU0037 | <i>Pseudomonas stutzeri</i> strain AAU PG1 16S ribosomal RNA gene, partial                          | KX358068  | 99  | organic concoction "panchagavya"                                         |
| OTU0039 | Uncultured <i>Photobacterium</i> sp. clone F.c-7 16S ribosomal RNA gene, partial sequence           | GU225837  | 99  | shrimp intestine                                                         |
| OTU0040 | <i>Massilia timonae</i> strain Bsw-26b 16S ribosomal RNA gene, partial sequence                     | KX161400  | 99  | water, Badab-e Surt travertine spring                                    |



|         |                                                                                                 |           |     |                                                     |
|---------|-------------------------------------------------------------------------------------------------|-----------|-----|-----------------------------------------------------|
| OTU0041 | Uncultured bacterium clone G4TICC403GDU7W 16S ribosomal RNA gene, partial sequence              | JQ074296  | 98  | Indoor air                                          |
| OTU0042 | <i>Streptococcus vestibularis</i> strain MRS_87-5 16S ribosomal RNA gene, partial sequence      | KX673987  | 99  | human fecal sample                                  |
| OTU0043 | <i>Marinomonas ushuaiensis</i> strain hMe9-8 16S ribosomal RNA gene, partial sequence           | KX453227  | 99  | fluids of marine invertebrates                      |
| OTU0044 | Uncultured bacterium clone HH_b02_1 16S ribosomal RNA gene, partial sequence                    | EU775648  | 100 | hedgehog faeces                                     |
| OTU0045 | <i>Fingoldia magna</i> strain DNF00923 16S ribosomal RNA gene, partial sequence                 | KU726690  | 99  | vaginal fluid from subject with bacterial vaginosis |
| OTU0046 | <i>Micrococcus</i> sp. strain BAB-5964 16S ribosomal RNA gene, partial sequence                 | KX622627  | 99  | soil                                                |
| OTU0047 | <i>Saccharopolyspora halotolerans</i> strain TRM 45123 16S ribosomal RNA, partial sequence      | NR_134166 | 98  | hypersaline lake                                    |
| OTU0048 | Uncultured bacterium clone p23_20-D03 16S ribosomal RNA gene, partial sequence                  | KX437175  | 100 | plaque from teeth                                   |
| OTU0049 | Uncultured bacterium clone I3Q1XXJ02BS9EH 16S ribosomal RNA gene, partial sequence              | KP953699  | 100 | intestinal flora of black tiger shrimp              |
| OTU0050 | <i>Corynebacterium variabile</i> strain AA6-6 16S ribosomal RNA gene, partial sequence          | KU663670  | 99  | insect gut microflora                               |
| OTU0051 | Uncultured <i>Saccharopolyspora</i> sp. clone VE21-K11 16S ribosomal RNA gene, partial sequence | KF767304  | 99  | parchment                                           |
| OTU0052 | <i>Pseudoalteromonas marina</i> strain NJES-88 16S ribosomal RNA gene, partial sequence         | KR140261  | 99  | digestive tracts of Antarctic krills                |
| OTU0053 | Uncultured bacterium clone IZ1RPV403DLWZX 16S ribosomal RNA                                     | KP948142  | 99  | intestinal flora of black tiger shrimp              |

|         |                                                                                              |           |     |                                                                          |
|---------|----------------------------------------------------------------------------------------------|-----------|-----|--------------------------------------------------------------------------|
|         | gene, partial sequence                                                                       |           |     |                                                                          |
| OTU0054 | <i>Saccharopolyspora cavernae</i> strain YIM C01235 16S ribosomal RNA gene, partial sequence | NR_126289 | 97  | swallow cave in Yunnan                                                   |
| OTU0055 | Uncultured bacterium clone IZ1RPV404EDZS2 16S ribosomal RNA gene, partial sequence           | KP948749  | 99  | intestines of the black tiger shrimp                                     |
| OTU0056 | Uncultured <i>Vibrio</i> sp. clone T028deg41 16S ribosomal RNA gene, partial sequence        | JN210667  | 99  | sponge tissue                                                            |
| OTU0057 | <i>Acinetobacter</i> sp. HKG 224 16S ribosomal RNA gene, partial sequence                    | KU687329  | 99  | soil sediments                                                           |
| OTU0058 | <i>Massilia alkalitolerans</i> 16S ribosomal RNA gene, partial sequence                      | KX013423  | 99  | desertic areas of South-East Morocco                                     |
| OTU0059 | Uncultured bacterium clone BIGO525 16S ribosomal RNA gene, partial sequence                  | HM558649  | 99  | herbivore insect microbiome                                              |
| OTU0060 | Uncultured bacterium clone 071065_556 16S ribosomal RNA gene, partial sequence               | JQ475196  | 99  | human mouth                                                              |
| OTU0061 | <i>Cobetia amphilecti</i> strain 25 16S ribosomal RNA gene, partial sequence                 | KX218313  | 99  | male <i>Octopus</i> mucus                                                |
| OTU0062 | Uncultured bacterium clone HYPJBHH13H4NHH 16S ribosomal RNA gene, partial sequence           | KF316017  | 99  | hydraulic fracturing fluids and produced water from shale gas extraction |
| OTU0063 | Uncultured bacterium clone ncd700e08c1 16S ribosomal RNA gene, partial sequence              | HM291804  | 99  | skin, nare                                                               |
| OTU0064 | Uncultured bacterium clone IZ1RPV403CYXQV 16S ribosomal RNA gene, partial sequence           | KP948057  | 99  | intestinal flora of black tiger shrimp                                   |
| OTU0065 | Uncultured bacterium clone ncd1885c01c1 16S ribosomal RNA gene, partial sequence             | JF162761  | 99  | skin, antecubital fossa                                                  |
| OTU0066 | Uncultured <i>Acinetobacter</i> sp. clone BER_e12 16S ribosomal RNA gene,                    | JQ815599  | 100 | Tinto River acidic sediments                                             |

|         |                                                                                                    |          |    |                                                                    |
|---------|----------------------------------------------------------------------------------------------------|----------|----|--------------------------------------------------------------------|
|         | partial sequence                                                                                   |          |    |                                                                    |
| OTU0067 | Uncultured bacterium clone G4RKN2Y15JDCSA                                                          | KC033337 | 99 | soybean aphid                                                      |
| OTU0068 | Uncultured bacterium clone GXTJ5A301BBJGP 16S ribosomal RNA gene, partial sequence                 | KF329567 | 98 | intestinal flora of black tiger shrimp                             |
| OTU0069 | Uncultured Rhodobacteraceae bacterium clone 1LM16-3 16S ribosomal RNA gene, partial sequence       | JN232343 | 98 | seagrass epiphytic biofilm                                         |
| OTU0070 | Uncultured <i>Gemella</i> sp. clone 074-194 16S ribosomal RNA gene, partial sequence               | KU363169 | 99 | oral cavity                                                        |
| OTU0071 | <i>Halomonas</i> sp. U1368-101106-SW116                                                            | JQ082135 | 99 | surface sea water                                                  |
| OTU0072 | <i>Granulicatella adiacens</i> gene for 16S ribosomal RNA, strain: GM01                            | LC125190 | 99 | human endophthalmitis patient                                      |
| OTU0073 | Bacterium 'H. scabra 1 (H-Fa)' 16S ribosomal RNA gene, partial sequence                            | JX022727 | 99 | hindgut-feces                                                      |
| OTU0074 | Uncultured bacterium clone I3Q1XXJ02CG1P3 16S ribosomal RNA gene, partial sequence                 | KP953479 | 98 | intestinal flora of black tiger shrimp                             |
| OTU0075 | <i>Shewanella baltica</i> strain I-M-3-2 16S ribosomal RNA gene, partial sequence                  | KU570317 | 99 | intestinal tract and gills of Chinese mitten crab                  |
| OTU0076 | Uncultured <i>Veillonella</i> sp. clone OTU_10559 16S ribosomal RNA gene, partial sequence         | KR841843 | 99 | soil of a tobacco plantation                                       |
| OTU0077 | Uncultured Pseudonocardiaceae bacterium clone Bo-Arch-K16 16S ribosomal RNA gene, partial sequence | KF767291 | 99 | parchment                                                          |
| OTU0078 | Uncultured <i>Aliivibrio</i> sp. clone O-A5 16S ribosomal RNA gene, partial sequence               | HQ897484 | 99 | intestinal microbiota of farmed Atlantic salmon <i>Salmo salar</i> |
| OTU0079 | Uncultured <i>Saccharopolyspora</i> sp. clone VE21-K13 16S ribosomal RNA gene, partial sequence    | KF767306 | 99 | parchment                                                          |

|         |                                                                                                 |          |     |                                        |
|---------|-------------------------------------------------------------------------------------------------|----------|-----|----------------------------------------|
| OTU0080 | <i>Corynebacterium kroppenstedtii</i> strain VA5601_15 16S ribosomal RNA gene, partial sequence | KT347607 | 99  | prevertebral abscess                   |
| OTU0081 | Uncultured bacterium clone ncd2140c06c1 16S ribosomal RNA gene, partial sequence                | JF184172 | 99  | human skin, nare                       |
| OTU0082 | <i>Fusobacterium</i> sp. Marseille-P2749 partial 16S rRNA gene, strain Marseille-P2749          | LT576389 | 99  | stool sample from hospital in Timone   |
| OTU0083 | Uncultured bacterium clone GXTJ5A301BTLUK 16S ribosomal RNA gene, partial sequence              | KF333779 | 97  | intestinal flora of black tiger shrimp |
| OTU0084 | Uncultured prokaryote clone OTU_5702 16S ribosomal RNA gene, partial sequence                   | KT018789 | 100 | heavy metal contaminated soil          |
| OTU0085 | <i>Actinomyces johnsonii</i> strain RSAA17 16S ribosomal RNA gene, partial sequence             | KX298724 | 99  | sheep                                  |
| OTU0086 | <i>Vibrio harveyi</i> strain ATCC 43516 chromosome 1, complete sequence                         | CP014038 | 99  | shark                                  |
| OTU0087 | Uncultured bacterium clone ncd2677e07c1 16S ribosomal RNA gene, partial sequence                | JF232588 | 99  | skin                                   |
| OTU0088 | <i>Rothia mucilaginosa</i> strain DNF00207 16S ribosomal RNA gene, partial sequence             | KU726646 | 99  | vaginal fluid                          |
| OTU0089 | <i>Pseudomonas oryzihabitans</i> strain H72 16S ribosomal RNA gene, partial sequence            | KX390639 | 100 | indoor environment                     |
| OTU0090 | Uncultured <i>Vibrio</i> sp. clone 12L_112 16S ribosomal RNA gene, partial sequence             | KP183078 | 99  | surface sea water, China South Sea     |
| OTU0091 | Uncultured bacterium clone B4-2 16S ribosomal RNA gene, partial sequence                        | KF494503 | 98  | permafrost soil                        |
| OTU0092 | Uncultured <i>Corynebacterium</i> sp. clone B8-70 16S ribosomal RNA gene, partial               | KF448111 | 99  | water-flooded petroleum reservoirs     |

|         |                                                                                          |           |     |                                                                          |
|---------|------------------------------------------------------------------------------------------|-----------|-----|--------------------------------------------------------------------------|
|         | sequence                                                                                 |           |     |                                                                          |
| OTU0093 | Uncultured <i>Aeromonas</i> sp. clone DGL42 16S ribosomal RNA gene, partial sequence     | AY528791  | 99  | activated sludge                                                         |
| OTU0094 | <i>Kocuria rhizophila</i> strain Bss-9a 16S ribosomal RNA gene, partial sequence         | KX161390  | 99  | sediment from Badab-e Surt travertine spring                             |
| OTU0095 | Uncultured bacterium clone p31_44-D06 16S ribosomal RNA gene, partial sequence           | KX437605  | 99  | plaque from teeth                                                        |
| OTU0096 | <i>Saccharopolyspora</i> sp. AFM 10238 16S ribosomal RNA gene, partial sequence          | KF673492  | 98  | Dead Sea                                                                 |
| OTU0097 | <i>Pseudomonas luteola</i> strain LOCK 1011 16S ribosomal RNA gene, partial sequence     | KT728842  | 100 | textiles from 1250-1450 AC                                               |
| OTU0098 | Uncultured bacterium clone HYPJBHH15I4RDY 16S ribosomal RNA gene, partial sequence       | KF316172  | 99  | hydraulic fracturing fluids and produced water from shale gas extraction |
| OTU0099 | Uncultured bacterium clone I3Q1XXJ01A7M8V 16S ribosomal RNA gene, partial sequence       | KP953518  | 97  | intestinal flora of black tiger shrimp                                   |
| OTU0100 | <i>Azospirillum formosense</i> strain UENF-411203                                        | KU850954  | 99  | tropical fruits crop                                                     |
| OTU0101 | <i>Veillonella parvula</i> strain NRBB60 16S ribosomal RNA gene, partial sequence        | KX130947  | 99  | buffalo rumen liquor                                                     |
| OTU0102 | Uncultured bacterium clone I3Q1XXJ02CAUFP 16S ribosomal RNA gene, partial sequence       | KP952426  | 98  | intestines of the black tiger shrimp                                     |
| OTU0103 | <i>Rheinheimera japonica</i> strain KP17 16S ribosomal RNA gene, partial sequence        | NR_136858 | 99  | seashore sediments of the Sea of Japan                                   |
| OTU0104 | Uncultured <i>Cetobacterium</i> sp. clone L.j-1 16S ribosomal RNA gene, partial sequence | HM031433  | 97  | intestines of marine fishes                                              |
| OTU0105 | <i>Saccharopolyspora</i> sp. 13-18-42 16S ribosomal RNA gene, partial sequence           | KM886189  | 98  | sponge, South China Sea                                                  |

|         |                                                                                                    |          |     |                                        |
|---------|----------------------------------------------------------------------------------------------------|----------|-----|----------------------------------------|
| OTU0106 | <i>Saccharopolyspora</i> sp. 13-18-42 16S ribosomal RNA gene, partial sequence                     | KM886189 | 98  | sponge, South China Sea                |
| OTU0107 | <i>Corynebacterium imitans</i> strain 58FIII 16S ribosomal RNA gene, partial sequence              | KT832816 | 99  | hospital objects and surfaces          |
| OTU0108 | Uncultured bacterium clone OTU_28873 16S ribosomal RNA gene, partial sequence                      | KU224876 | 99  | freshwater biofilm                     |
| OTU0109 | Uncultured <i>Vibrio</i> sp. clone GY29W4J02G4CEG 16S ribosomal RNA gene, partial sequence         | KF116007 | 99  | red palm weevil                        |
| OTU0110 | <i>Aeromonas caviae</i> strain F1 16S ribosomal RNA gene, partial sequence                         | KP120939 | 98  | natural waters                         |
| OTU0111 | Uncultured <i>Neisseriales</i> bacterium clone E5VB3_96 16S ribosomal RNA gene, partial sequence   | HM080824 | 100 | prostatitis sample                     |
| OTU0112 | Uncultured bacterium clone 16S(V3-V4)-865 16S ribosomal RNA gene, partial sequence                 | KX623641 | 99  | rhizosphere soil                       |
| OTU0113 | Uncultured <i>Saccharopolyspora</i> sp. clone VE21-K12 16S ribosomal RNA gene, partial sequence    | KF767305 | 98  | parchment                              |
| OTU0115 | <i>Prevotellaceae</i> bacterium Marseille-P2826 partial 16S rRNA gene, strain Marseille-P2826      | LT576392 | 99  | human duodenum sample                  |
| OTU0116 | Uncultured <i>Saccharopolyspora</i> sp. clone Bo-Arch-K40 16S ribosomal RNA gene, partial sequence | KF767296 | 99  | parchment                              |
| OTU0117 | Uncultured bacterium partial 16S rRNA gene, clone US11.34_V02193B_093                              | FN826506 | 98  | cystic fibrosis patient sputum         |
| OTU0118 | Uncultured bacterium gene for 16S rRNA, partial sequence, clone: PT-MAG-B41                        | AB369028 | 100 | petroleum crude oil in Asia            |
| OTU0119 | Uncultured bacterium clone I3Q1XXJ01A03QI 16S ribosomal RNA gene, partial sequence                 | KP949610 | 97  | intestinal flora of black tiger shrimp |

|         |                                                                                                 |           |    |                                                                  |
|---------|-------------------------------------------------------------------------------------------------|-----------|----|------------------------------------------------------------------|
| OTU0121 | Uncultured Proteobacterium clone Upland_16_5276                                                 | JF985978  | 99 | agricultural soil                                                |
| OTU0123 | <i>Vibrio harveyi</i> strain T4Y2 16S ribosomal RNA gene, partial sequence                      | JF520424  | 99 | marine fish in Sabah                                             |
| OTU0124 | <i>Vibrio porteresiae</i> strain MSSRF30 16S ribosomal RNA gene, partial sequence               | NR_044248 | 99 | rhizosphere of <i>Porteresia coarctata</i> growing in a mangrove |
| OTU0126 | Uncultured bacterium clone OTU_1450 16S ribosomal RNA gene, partial sequence                    | KU226295  | 99 | soil                                                             |
| OTU0127 | Uncultured <i>Saccharopolyspora</i> sp. clone VE21-K39 16S ribosomal RNA gene, partial sequence | KF767303  | 98 | parchment                                                        |
| OTU0130 | Uncultured bacterium clone IZ1RPV403DKA14 16S ribosomal RNA gene, partial sequence              | KP948277  | 98 | intestinal flora of black tiger shrimp                           |
| OTU0131 | Uncultured Rubrobacteridae bacterium clone S3-013 16S ribosomal RNA gene, partial sequence      | KF183142  | 98 | soil of continuous peanut cropping                               |
| OTU0133 | Uncultured <i>Erwinia</i> sp. clone GY29W4J02JHLJO 16S ribosomal RNA gene, partial sequence     | KF115748  | 99 | red palm weevil                                                  |
| OTU0134 | Uncultured <i>Cetobacterium</i> sp. clone L.j-1 16S ribosomal RNA gene, partial sequence        | HM031433  | 99 | intestines of marine fishes                                      |
| OTU0135 | <i>Fusobacterium</i> sp. Marseille-P2749 partial 16S rRNA gene, strain Marseille-P2749          | LT576389  | 98 | stool sample from hospital in Timone                             |
| OTU0136 | <i>Stenotrophomonas</i> sp. s1425 16S ribosomal RNA gene, partial sequence                      | KX085483  | 99 | <i>Stenotrophomonas</i> sp. s1425                                |
| OTU0137 | <i>Salinicoccus</i> sp. strain YM-15 16S ribosomal RNA gene, partial sequence                   | KX225419  | 99 | Yuncheng salt lake                                               |
| OTU0138 | Uncultured Alphaproteobacterium clone Hc_OTU1                                                   | HM593540  | 99 | sponge and corals                                                |
| OTU0139 | <i>Saccharopolyspora</i> sp. AFM 10238 16S ribosomal RNA gene, partial sequence                 | KF673492  | 97 | Dead Sea                                                         |

|         |                                                                                                    |          |    |                                                                          |
|---------|----------------------------------------------------------------------------------------------------|----------|----|--------------------------------------------------------------------------|
| OTU0140 | Uncultured <i>Moraxellaceae</i> bacterium clone SIM056 16S ribosomal RNA gene, partial sequence    | JF733221 | 96 | black flies                                                              |
| OTU0141 | <i>Comamonas</i> sp. RCB175 16S ribosomal RNA gene, partial sequence                               | KT260387 | 99 | bat guano                                                                |
| OTU0142 | Uncultured bacterium clone H39KNTR01BZZ8U 16S ribosomal RNA gene, partial sequence                 | KF315360 | 99 | hydraulic fracturing fluids and produced water from shale gas extraction |
| OTU0143 | Uncultured <i>Saccharopolyspora</i> sp. clone Bo-Arch-K10 16S ribosomal RNA gene, partial sequence | KF767295 | 97 | parchment                                                                |
| OTU0144 | <i>Pseudomonas</i> sp. D2-17 partial 16S rRNA gene, isolate D2-17                                  | AM403176 | 99 | marine aquaculture biofilter                                             |
| OTU0145 | Uncultured <i>Saccharopolyspora</i> sp. clone MS492-K11 16S ribosomal RNA gene, partial sequence   | KF767276 | 99 | parchment                                                                |
| OTU0146 | Uncultured <i>Saccharopolyspora</i> sp. clone VE21-K19 16S ribosomal RNA gene, partial sequence    | KF767307 | 98 | parchment                                                                |
| OTU0148 | <i>Tannerella</i> sp. oral taxon 286 clone WWP_SS7_C16 16S ribosomal RNA gene, partial sequence    | GU409361 | 99 | oral cavity                                                              |
| OTU0149 | Uncultured <i>Saccharopolyspora</i> sp. clone VE21-K19 16S ribosomal RNA gene, partial sequence    | KF767307 | 97 | parchment                                                                |
| OTU0150 | <i>Stenotrophomonas</i> sp. s1425 16S ribosomal RNA gene, partial sequence                         | KX085483 | 99 | <i>Stenotrophomonas</i> sp. s1425                                        |
| OTU0152 | Uncultured actinomycete clone Z0-72 16S ribosomal RNA gene, partial sequence                       | KJ834229 | 98 | wheat straw mushroom compost                                             |
| OTU0155 | <i>Psychrobacter aestuarii</i> strain 0096 16S ribosomal RNA gene, partial sequence                | KP236231 | 99 | coastal area                                                             |
| OTU0156 | Uncultured <i>Saccharopolyspora</i> sp. clone VE21-K19 16S ribosomal RNA gene, partial sequence    | KF767307 | 98 | parchment                                                                |



|         |                                                                                            |          |    |                                          |
|---------|--------------------------------------------------------------------------------------------|----------|----|------------------------------------------|
| OTU0157 | <i>Azospirillum formosense</i> strain UENF-411203 16S ribosomal RNA gene, partial sequence | KU850954 | 98 | rhizosphere soil                         |
| OTU0159 | Uncultured bacterium clone G7DUZBG01AHBU7 16S ribosomal RNA gene, partial sequence         | KF329420 | 99 | intestinal flora <i>Penaeus monodon</i>  |
| OTU0160 | Uncultured bacterium clone I3Q1XXJ01A60NA 16S ribosomal RNA gene, partial sequence         | KP953371 | 99 | intestinal flora <i>Penaeus vannamei</i> |
| OTU0161 | Uncultured bacterium clone JFR0502_aaa12f04 16S ribosomal RNA gene, partial sequence       | HM779123 | 97 | conventionally-raised adult zebrafish    |
| OTU0163 | Uncultured bacterium clone ncd2170d07c2 16S ribosomal RNA gene, partial sequence           | JF189381 | 98 | skin antecubital fossa                   |
| OTU0164 | Uncultured bacterium clone I3Q1XXJ01AWXAX 16S ribosomal RNA gene, partial sequence         | KP952197 | 98 | intestinal flora <i>Penaeus vannamei</i> |
| OTU0165 | <i>Saccharopolyspora</i> sp. MOLA 1509 16S ribosomal RNA gene, partial sequence            | KM273921 | 98 | wash water                               |
| OTU0168 | Uncultured planctomycete clone Dover216A 16S ribosomal RNA gene, partial sequence          | AY499825 | 97 | marine sediment                          |
| OTU0169 | <i>Saccharopolyspora</i> sp. AFM 10238 16S ribosomal RNA gene, partial sequence            | KF673492 | 97 | Dead Sea                                 |
| OTU0172 | Uncultured bacterium clone GXTJ5A301BC6H6 16S ribosomal RNA gene, partial sequence         | JX934603 | 98 | intestinal flora <i>Penaeus monodon</i>  |
| OTU0174 | <i>Saccharopolyspora</i> sp. AFM 10238 16S ribosomal RNA gene, partial sequence            |          | 98 | Dead Sea                                 |
| OTU0175 | Uncultured bacterium clone nbw872c09c1 16S ribosomal RNA gene, partial sequence            | GQ031338 | 99 | skin, retroauricular crease              |
| OTU0176 | Uncultured bacterium clone ncd2062g05c1 16S ribosomal RNA gene, partial sequence           | JF177605 | 99 | skin, antecubital fossa                  |

|         |                                                                                     |          |     |                                                                          |
|---------|-------------------------------------------------------------------------------------|----------|-----|--------------------------------------------------------------------------|
| OTU0179 | Uncultured bacterium clone I3Q1XXJ02B18KP 16S ribosomal RNA gene, partial sequence  | KP953226 | 97  | intestinal flora <i>Penaeus vannamei</i>                                 |
| OTU0181 | <i>Acinetobacter</i> sp. TUST-DFRC2 16S ribosomal RNA gene, partial sequence        | KX390869 | 100 | crude oil marine water                                                   |
| OTU0183 | Uncultured bacterium clone 1_62_F08 16S ribosomal RNA gene, partial sequence        | KX376534 | 100 | mesh from abdominal                                                      |
| OTU0184 | Uncultured bacterium clone p9_62 16S ribosomal RNA gene, partial sequence           | KJ601253 | 97  | seawater around coral                                                    |
| OTU0185 | Uncultured bacterium clone 16S(V3-V4)-3783 16S ribosomal RNA gene, partial sequence | KX626448 | 98  | rhizosphere soil                                                         |
| OTU0186 | Uncultured Rhodobacteraceae bacterium 16S rRNA gene, clone W3R21                    | LT576206 | 99  | roots of wheat plant                                                     |
| OTU0187 | Uncultured bacterium clone HYPJBHH14IN8MC 16S ribosomal RNA gene, partial sequence  | KF315822 | 98  | hydraulic fracturing fluids and produced water from shale gas extraction |
| OTU0189 | Uncultured bacterium clone 16S(V3-V4)-7891 16S ribosomal RNA gene, partial sequence | KX630383 | 99  | rhizosphere soil                                                         |
| OTU0190 | Uncultured bacterium clone GXTJ5A301BTPTV 16S ribosomal RNA gene, partial sequence  | KF334052 | 98  | intestinal flora <i>Penaeus monodon</i>                                  |

The best scoring sequence was chosen; whenever a score was shared by several sequences, the first sequence has been listed, possibly avoiding the ones referring to purified genomes.

Figure S1. Venn diagram of the OTUs found in the purple damaged (Purple) and in the uncoloured undamaged (White) samples.

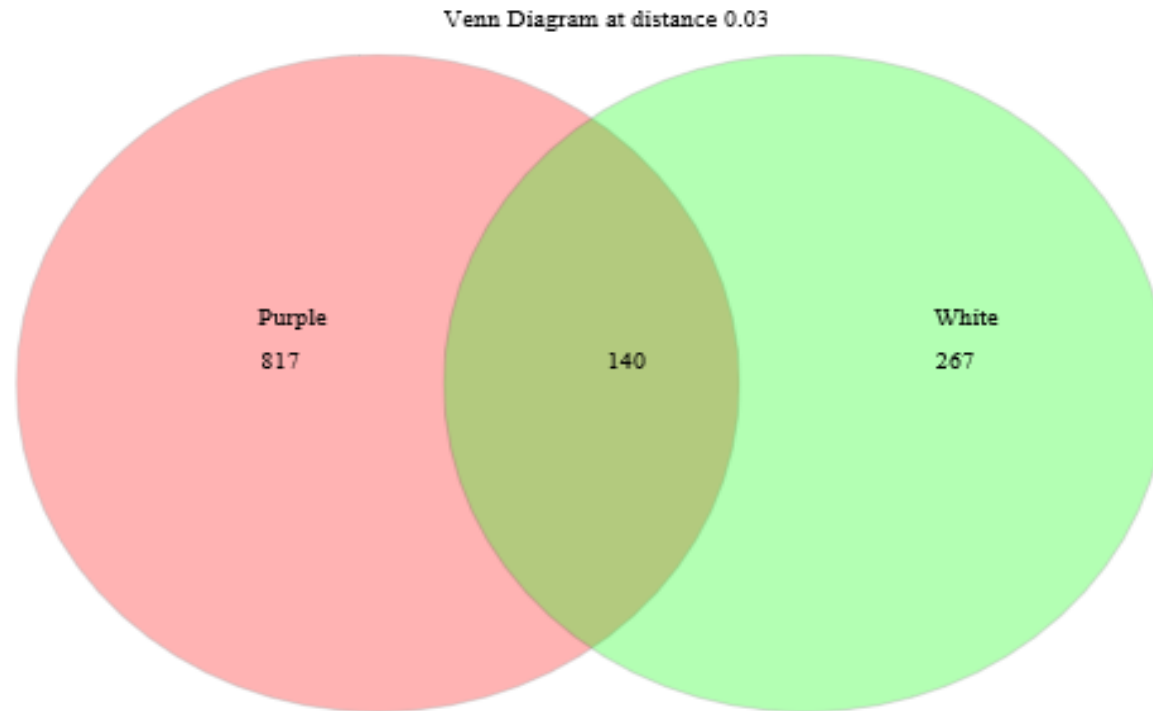

The number of species in group Purple is 957, and the number of sequences is 11445; 1498 sequences are not shared

The number of species in group White is 407, and the number of sequences is 5385; 382 sequences are not shared

The number of species shared between groups Purple and White is 140, and the number of sequences is 14950; 88.8295% of these sequences are shared

Percentage of species that are shared in groups Purple and White is 11.4379

The total richness for all groups is 1224
